# Supplementary material for: What change in body mass index is associated with improvement in percentage body fat in childhood obesity? A meta-regression
Source: PubMed Central journal article supplement (PMC6720247; doi:10.1136/bmjopen-2018-028231), 2019-08-30
Supplement: bmjopen-2018-028231.draft_revisions.pdf [file bmjopen-2018-028231.draft_revisions.pdf]

# BMJ Open

BMJ Open is committed to open peer review. As part of this commitment we make the peer review history of every article we publish publicly available.

When an article is published we post the peer reviewers' comments and the authors' responses online. We also post the versions of the paper that were used during peer review. These are the versions that the peer review comments apply to.

The versions of the paper that follow are the versions that were submitted during the peer review process. They are not the versions of record or the final published versions. They should not be cited or distributed as the published version of this manuscript.

BMJ Open is an open access journal and the full, final, typeset and author-corrected version of record of the manuscript is available on our site with no access controls, subscription charges or pay-per-view fees (<http://bmjopen.bmj.com>).

If you have any questions on BMJ Open's open peer review process please email [info.bmjopen@bmj.com](mailto:info.bmjopen@bmj.com)

# BMJ Open

## What change in body mass index reduces body fat in childhood obesity: a meta-regression.

|                               |                                                                                                                                                                                                                                                                                                                                                                                                                                                |
|-------------------------------|------------------------------------------------------------------------------------------------------------------------------------------------------------------------------------------------------------------------------------------------------------------------------------------------------------------------------------------------------------------------------------------------------------------------------------------------|
| Journal:                      | <i>BMJ Open</i>                                                                                                                                                                                                                                                                                                                                                                                                                                |
| Manuscript ID                 | bmjopen-2018-028231                                                                                                                                                                                                                                                                                                                                                                                                                            |
| Article Type:                 | Research                                                                                                                                                                                                                                                                                                                                                                                                                                       |
| Date Submitted by the Author: | 27-Nov-2018                                                                                                                                                                                                                                                                                                                                                                                                                                    |
| Complete List of Authors:     | Birch, Laura; NIHR Bristol Biomedical Research Centre - Nutrition<br>Perry, Rachel; NIHR Bristol Biomedical Research Centre - Nutrition<br>Hunt, Linda<br>Matson, Rhys; NIHR Bristol Biomedical Research Centre - Nutrition<br>Chong, Amanda; NIHR Bristol Biomedical Research Centre - Nutrition<br>Beynon, Rhona; NIHR Bristol Biomedical Research Centre - Nutrition<br>Shield, Julian; NIHR Bristol Biomedical Research Centre - Nutrition |
| Keywords:                     | obesity, childhood, adolescence, body mass index, body fat                                                                                                                                                                                                                                                                                                                                                                                     |
|                               |                                                                                                                                                                                                                                                                                                                                                                                                                                                |

SCHOLARONE™  
Manuscripts

## What change in body mass index reduces body fat in childhood obesity: a meta-regression.

Laura Birch<sup>a</sup>, RD MSc, Rachel Perry<sup>a</sup>, PhD, Linda P Hunt<sup>a</sup>, PhD, Rhys IB Matson<sup>a</sup>, MSc, Amanda Chong<sup>a</sup>, BSc, Rhona Beynon<sup>a</sup>, MSc, Julian Hamilton-Shield<sup>a,b</sup> MD

**Affiliations:** <sup>a</sup> NIHR Bristol Biomedical Research Centre – Nutrition Theme, Level 3 University Hospitals Bristol Education Centre, Upper Maudlin Street, Bristol.

<sup>b</sup> University Hospitals Bristol NHS Foundation Trust, Level 6 University Hospitals Bristol Education Centre, Upper Maudlin Street, Bristol.

**Address correspondence to:** Laura Birch, NIHR Bristol Biomedical Research Centre – Nutrition Theme, Level 3 University Hospitals Bristol Education Centre, Upper Maudlin Street, Bristol, UK, BS2 8AE, [laura.birch@bristol.ac.uk], +44 (0)117 3421763

[Rachel.Perry@bristol.ac.uk](mailto:Rachel.Perry@bristol.ac.uk)

[L.P.Hunt@bristol.ac.uk](mailto:L.P.Hunt@bristol.ac.uk)

[Rhys20@me.com](mailto:Rhys20@me.com)

[ac14629@bristol.ac.uk](mailto:ac14629@bristol.ac.uk)

[rhona.beynon@bristol.ac.uk](mailto:rhona.beynon@bristol.ac.uk)

[J.P.H.Shield@bristol.ac.uk](mailto:J.P.H.Shield@bristol.ac.uk)

**Short title:** BMI change to reduce body fat in childhood obesity

**Financial Disclosure:** The authors have no financial relationships relevant to this article to disclose.

**Funding Source:** This study was supported by the NIHR Biomedical Research Centre at University Hospitals Bristol NHS Foundation Trust and the University of Bristol. The views expressed in this publication are those of the authors and not necessarily those of the NHS, the National Institute for Health Research or the Department of Health.

**Conflict of Interest:** Professor Hamilton-Shield is a lead author on two studies included in the systematic review that this paper reports on. The other authors have no conflicts of interest to disclose.

**Key words:** obesity, childhood, adolescence, body mass index, body fat

### Abbreviations:

BMI-SDS: body mass index- standard deviation score

RCT: randomised controlled trial

IOTF: International Obesity Task Force

HOMA: Homeostatic model assessment

LDL: Low-density lipoprotein

HDL: High-density lipoprotein

IL6: Interleukin 6

ALT: Alanine transaminase

HTA: Health Technology Assessment

SD: standard deviation

SE: standard error

1  
2  
3 CI: Confidence interval  
4 PI: Prediction interval  
5 IQR: Interquartile range  
6  
7  
8

9 **Word count: 3925**  
10  
11  
12  
13  
14  
15  
16  
17  
18  
19  
20  
21  
22  
23  
24  
25  
26  
27  
28  
29  
30  
31  
32  
33  
34  
35  
36  
37  
38  
39  
40  
41  
42  
43  
44  
45  
46  
47  
48  
49  
50  
51  
52  
53  
54  
55  
56  
57  
58  
59  
60

For peer review only

## Abstract

**Objective:** Using meta-regression this paper sets out the minimum change in BMI-SDS/z-score required to improve adiposity as percentage body fat for obese children and adolescents.

**Design:** Meta-regression.

**Setting:** Studies were identified as part of a large-scale systematic review of the following electronic databases: AMED, Embase, MEDLINE via OVID, Web of Science and CENTRAL via Cochrane library.

**Participants:** Individuals aged 4–19 years with a diagnosis of obesity according to defined BMI thresholds.

**Interventions:** Studies of lifestyle treatment interventions that included dietary, physical activity and/or behavioural components with the objective of reducing obesity were included. Interventions of less than 2 weeks duration and those that involved surgical and/or pharmacological components (e.g. bariatric surgery, drug therapy) were excluded.

**Primary and secondary outcome measures:** To be included in this review, studies had to report baseline and post-intervention BMI-SDS/z-score or change measurements (primary outcome measures) plus one or more of the following markers of metabolic health (secondary outcome measures): adiposity measures other than BMI; blood pressure; glucose; inflammation; insulin sensitivity/resistance; lipid profile; liver function. This paper focuses on the adiposity measures only. Further papers in this series will report on other outcome measures.

**Results:** This paper explores the potential impact of BMI-SDS reduction in terms of change in percentage body fat. Thirty-nine studies reporting change in mean percentage body fat were analysed. Meta-regression demonstrated that reduction of at least 0.6 in mean BMI-SDS ensured a mean reduction of percentage body fat mass, in the sense that the associated 95% prediction interval for change in mean percentage body fat was wholly negative.

**Conclusions:** Interventions demonstrating reductions of 0.6 BMI-SDS might be termed successful in reducing adiposity; a key purpose of weight management interventions.

**Trial registration:** The main review is registered on PROSPERO international prospective register of systematic reviews (PROSPERO 2016 CRD42016025317).

## Article Summary

### Strengths and limitations of this study

- We believe that this is the first paper to attempt to bring together all studies that have reported both a change in BMI-SDS/z-score and changes in a marker of adiposity in the obese paediatric population.
- The systematic methods employed to identify the included studies were stringent, but it is possible that some relevant studies might have been missed.
- There was some variation in the reporting of results where there were multiple publications of the same study; in these cases, the results from the most comprehensive paper have been used.
- Studies that did not report change in mean percentage body fat could not be included in this meta-regression.

### Introduction

Childhood obesity is one of the most serious global public health challenges of the twenty-first century<sup>1</sup>. In England, the latest figures from the National Child Measurement Programme, which measures the height and weight of around one million school children every year, showed that 9.6 percent of children aged 4–5 years and 20 percent of those aged 10–11 years were obese<sup>2,3</sup>. Childhood obesity has adverse health consequences in both the short-and long-term (an increased risk of developing metabolic disturbances, including hypertension, dyslipidaemia and insulin resistance, and becoming obese adults<sup>4</sup>). The presence of adverse changes in cardiac and vascular function and type 2 diabetes, which were previously considered adult morbidities, now being identified in obese children and adolescents<sup>5-11</sup> illustrates the urgent need for effective weight management treatment interventions to improve the metabolic health status of the paediatric population.

Moderate weight loss has been shown to have a positive impact on many metabolic and cardiovascular risk factors<sup>12,13</sup>. Weight management interventions for obese adults that result in a 5-10 percent decrease in body weight are associated with significant improvements in blood pressure, serum lipid levels and glucose tolerance<sup>14</sup> and reduction in the prevalence of

1  
2  
3 hypertension and diabetes<sup>15</sup>. Minimum weight management targets can therefore be set to  
4  
5 improve metabolic health in this population<sup>16</sup>.  
6  
7  
8  
9

10 During childhood, all measurements over time are complicated by the influence of growth,  
11  
12 meaning that cut-offs routinely used in the adult population cannot be used in children and  
13  
14 adolescents. However measured values of body mass index (BMI) can be standardized into z-  
15  
16 scores in respect to reference populations<sup>2,3</sup> (BMI z-scores) or standard deviation scores (BMI-  
17  
18 SDS). The degree of overweight is quantified using Cole's box cox-transformation, which  
19  
20 normalizes the BMI skewed distribution in childhood and expresses BMI as a standard deviation  
21  
22 score (BMI-SDS)<sup>17</sup>. These standardised scores provide a normalised measurement for the degree  
23  
24 of obesity in children and young people, indicating to what degree an individual BMI lies above  
25  
26 or below the median BMI value.  
27  
28  
29  
30  
31  
32

33 A meta-analysis by Ho *et al*<sup>18</sup> concluded that lifestyle interventions can lead to improvements  
34  
35 in weight and cardio-metabolic outcomes in child obesity. However, whilst numerous lifestyle  
36  
37 intervention programmes to tackle childhood obesity are conducted across the UK, and many  
38  
39 describe statistically significant reductions in BMI-SDS<sup>19</sup>, these results do not necessarily  
40  
41 translate into clinical benefit for the individual. The clinical significance of the reduced BMI-  
42  
43 SDS in terms of improvements in adiposity and metabolic profile is uncertain. The amount of  
44  
45 weight reduction needed to effect beneficial change in metabolic health in the paediatric  
46  
47 population is largely unknown.  
48  
49  
50  
51  
52  
53  
54

55 Paediatric weight management guidelines exist in many countries to promote best practice, but  
56  
57 at present many of these recommendations are based on low-grade scientific evidence<sup>20</sup>.  
58  
59 Understanding how much BMI must be reduced to positively affect metabolic health is important  
60

1  
2  
3 to ensure that treatment interventions are appropriately designed and evaluated<sup>21</sup>. Interventions  
4 must effect beneficial change in relation to cardiometabolic risk factors, rather than just  
5 statistical significance, if they are to be considered successful.  
6  
7  
8  
9

10  
11  
12  
13 Given the scale of the obesity problem and the significant and sustained adverse effects on  
14 health, clinically effective paediatric weight management treatment options are vital. A meta-  
15 analysis of cardiovascular disease risk in healthy children and its association with BMI has been  
16 conducted<sup>22</sup> but there is yet to be a systematic quantification of the reduction in BMI or adiposity  
17 needed to achieve improvements in metabolic health in the obese paediatric population.  
18  
19  
20  
21  
22  
23  
24  
25

26  
27 It is important to highlight that when assessing interventions designed to manage overweight  
28 and obesity in children and adolescents, it is essential to recognise that measures such as BMI  
29 and derived SDS scores are surrogates of the real purpose: reduction of adiposity, fat being the  
30 key organ involved in metabolic complications<sup>23</sup>. To rigorously assess the clinical and cost  
31 effectiveness of weight management interventions in young people, it is first necessary to  
32 understand what BMI-SDS change means in terms of key outcomes such as effects on adiposity  
33 and metabolic health. This paper is designed to put BMI-SDS changes in context when  
34 considering clinical efficacy. Through meta-regression analysis we explore the potential impact  
35 of BMI-SDS reduction in terms of change in percentage body fat. The outcome of which will  
36 both inform clinical guidelines for paediatric weight management interventions and guide  
37 outcome measures in future clinical trials.  
38  
39  
40  
41  
42  
43  
44  
45  
46  
47  
48  
49  
50  
51

## 52 53 54 **Objective**

55  
56 This paper aims to establish the minimum change in BMI-SDS needed to effect improvements  
57 in adiposity markers of obese children and adolescents. This is the first of a series of three papers  
58  
59  
60



1  
2  
3 reporting on the findings from studies identified in a large systematic review (N=90 studies;  
4 searched up to May 2017) and focuses on the evidence in relation to adiposity (percentage body  
5 fat).  
6  
7  
8  
9

## 10 11 12 **Methods**

13  
14 The studies included in this paper were identified as part of large-scale systematic review  
15 (PROSPERO CRD42016025317). The protocol for this systematic review is available:  
16  
17 <https://doi.org/10.1186/s13643-016-0299-0>. The review was completed in January 2018 and the  
18  
19 results are still being evaluated.  
20  
21  
22  
23

### 24 25 26 *Participants*

27  
28 Studies with participants aged 4–19 years with a diagnosis of obesity using defined BMI  
29 thresholds were considered for inclusion. BMI-SDS was calculated as a function of the degree  
30 of obesity of the subjects when compared with BMI standards. BMI standards included, but were  
31 not limited to, the 98th centile on the UK 1990 growth reference chart<sup>24</sup>, 95th percentile on the  
32 US Centre for Disease Control and Prevention growth chart<sup>25</sup>, the International Obesity  
33 Taskforce (IOTF) BMI for age cut-points<sup>26</sup> and the World Health Organisation growth  
34 references<sup>27,28</sup>, in addition to country-specific obesity thresholds using BMI reference data from  
35 their paediatric populations. Studies that included overweight, as opposed to obese, individuals,  
36 pregnant females, or those with a critical illness, endocrine disorders or syndromic obesity were  
37 excluded from this review.  
38  
39  
40  
41  
42  
43  
44  
45  
46  
47  
48  
49  
50  
51

### 52 53 54 *Interventions*

55  
56 Studies of lifestyle treatment interventions that included dietary, physical activity and/or  
57 behavioural components with the objective of reducing obesity were included. Interventions of  
58  
59  
60

1  
2  
3 less than 2 weeks duration and those that involved surgical and/or pharmacological components  
4 (e.g. bariatric surgery, drug therapy) were excluded. Studies focused on obesity prevention were  
5  
6 also excluded. No restrictions were imposed regarding the setting or delivery of the  
7  
8 interventions.  
9  
10

### 11 12 13 14 15 *Outcome measures*

16  
17 To meet the inclusion criteria interventions had to report baseline (pre-) and post-intervention  
18  
19 BMI-SDS/z-score or change measurements of BMI-SDS/z-score plus one or more of the  
20  
21 following markers of metabolic health:  
22

- 23 • Adiposity measures other than BMI (including waist circumference and percentage body fat)
- 24
- 25 • Glucose
- 26
- 27 • Insulin sensitivity/resistance (homeostatic model assessment (HOMA))
- 28
- 29 • Lipid profile (triglycerides, total cholesterol, low-density lipoprotein (LDL)/high-density
- 30  
31 lipoprotein (HDL) cholesterol)
- 32
- 33 • Inflammation (C-reactive protein)
- 34
- 35 • Blood pressure (systolic, diastolic)
- 36
- 37 • Liver function
- 38  
39  
40  
41  
42  
43

44 This paper focuses on the adiposity measures only. Further papers in this series will report on  
45  
46 other outcome measures.  
47  
48  
49

### 50 51 *Study design*

52  
53 Completed, published, randomised controlled trials (RCTs) and non-randomised studies (cohort  
54  
55 studies) of lifestyle treatment interventions for obese children and adolescents, with or without  
56  
57 follow-up.  
58  
59  
60

### *Ethics*

Ethical approval was not required as this paper reviewed published studies only.

### *Information sources and search methods*

Studies were identified by searching five electronic databases from inception to May 2017 (AMED, Embase, MEDLINE via OVID, Web of Science and CENTRAL via Cochrane library), alongside scanning reference lists of included articles and through consultation with experts in the field. The search strategy for MEDLINE database is presented in Supplementary File 1.

### *Study Selection and data extraction*

Titles and abstracts were assessed for eligibility and the data outcome measures described previously were extracted by two independent reviewers from the review team (LB, AC, RP, RB) using a standardised data extraction template, which was piloted by both reviewers before starting the review to ensure consistency.

### *Quality assessment*

The focus of our study is the relationship between change in BMI-SDS and change in metabolic health parameters, rather than the specific treatment interventions that effect these changes. Therefore, risk of bias tools, such as the Cochrane Risk of Bias tool,<sup>29</sup> were not considered appropriate. The included studies were assessed for methodological quality by two members of the review team during the data extraction process using the Quality Assessment tool utilised in the 2004 Health Technology Assessment (HTA) systematic review of the long-term effects and economic consequences of treatments for obesity and implications for health improvement<sup>30</sup>. This Quality Assessment tool comprises 20 questions which are added together to give a final

1  
2  
3 score and a percentage rating, from which a level of quality is assigned. Any discrepancies in  
4  
5 Quality Assessment scoring were resolved through discussion.  
6  
7  
8  
9

### 10 *Analysis*

11  
12 We carried out random-effects meta-regression as implemented in Stata<sup>31</sup> to try to quantify the  
13  
14 relationship between mean change in BMI-SDS/z-score (independent, predictor variable) and  
15  
16 mean change in percentage body fat (target variable), where these were either reported, or were  
17  
18 able to be calculated from reported data. Further details are given below. We were not trying to  
19  
20 assess the relative effects of the various interventions, but rather to examine the relationship  
21  
22 between these two outcomes. Meta-regression allows for residual heterogeneity in the target  
23  
24 variable not explained by the predictor. Subsets from the same study (e.g. intervention vs control,  
25  
26 boys vs girls) were regarded as independent observations provided there was no data duplication.  
27  
28  
29  
30  
31  
32

## 33 **Results**

### 34 *Search Results*

35  
36 In total, 98 published articles relating to 90 different studies met the inclusion criteria for the  
37  
38 entire systematic review. See Figure 1 for a flow diagram illustrating the number of papers  
39  
40 excluded at each stage of the review. For studies reported in multiple publications, the reference  
41  
42 that provided the most comprehensive information has been used (see Table 1 for details).  
43  
44  
45  
46  
47  
48

### 49 ***Figure 1: Flow diagram from the systematic review that identified the included studies***

50  
51  
52  
53 The Venn diagram (Figure 2) illustrates how many studies were identified for the various  
54  
55 markers of metabolic health. Seventy-three studies assessed and reported adiposity measures.  
56  
57 The adiposity measures reported included percentage body fat, body fat-SDS, body mass, fat  
58  
59  
60

1  
2  
3 mass, fat-free-mass, waist circumference and waist circumference-SDS. The 68 studies that  
4  
5 examined diabetes/inflammation measures (HOMA, insulin, glucose, C-reactive protein,  
6  
7 Interleukin-6 (IL6), Alanine transaminase (ALT) and the 71 studies examining cardiac measures  
8  
9 (e.g. lipids, cholesterol, blood pressure) will be reported separately  
10  
11  
12  
13

14 ***Figure 2: Venn diagram illustrating the markers of metabolic health measured***  
15

16  
17  
18 *Studies for inclusion in meta-regression analysis*  
19

20  
21 Seventy-three studies assessed and reported adiposity measures. Of the different adiposity  
22  
23 measures that were reported in the 73 adiposity studies (percentage body fat, body fat-SDS, body  
24  
25 mass, fat mass, fat-free-mass, waist circumference and waist circumference-SDS), we elected to  
26  
27 examine percentage body fat as it was far more frequently reported across studies. Therefore, of  
28  
29 these 73 adiposity studies, we conducted our meta-regression on 39 studies which reported  
30  
31 percentage body fat values. These studies are presented in Table 1 with the corresponding  
32  
33 changes in BMI-SDS/z-score. The characteristics of the remaining studies that were excluded  
34  
35 from the meta-regression are summarised in Appendix 2.  
36  
37  
38  
39  
40  
41  
42  
43  
44  
45  
46  
47  
48  
49  
50  
51  
52  
53  
54  
55  
56  
57  
58  
59  
60

**Table 1: Characteristics of studies reporting adiposity outcomes with results of mean change in BMI-SDS and percentage body fat**

|   | Author, Year, Country (Intervention name)              | Study design: Sample size (n) Analysed (An)    | Obesity definition                                                                            | Age range (inclusion): Mean $\pm$ (SD) Sex (% F)                                                      | Pubertal status measure d | Diet D)/ Exercise (E)/D+E: Setting | Format & content                                                                                                                                                                                                                                                                                                                                                                                                                                                                                                                | Durati on (mths): Follow up (mths) | $\Delta$ BMI SDS/z-score by subgroup when reported | $\Delta$ % body fat score by subgroup when reported |
|---|--------------------------------------------------------|------------------------------------------------|-----------------------------------------------------------------------------------------------|-------------------------------------------------------------------------------------------------------|---------------------------|------------------------------------|---------------------------------------------------------------------------------------------------------------------------------------------------------------------------------------------------------------------------------------------------------------------------------------------------------------------------------------------------------------------------------------------------------------------------------------------------------------------------------------------------------------------------------|------------------------------------|----------------------------------------------------|-----------------------------------------------------|
| 1 | Bell 2007 <sup>32</sup><br>Australia                   | Cohort<br>Total = 14                           | BMI $\geq$ 95 <sup>th</sup> %ile                                                              | Age range:9-16<br>12.70(2.32); F=43%                                                                  | Yes-Tanner                | E:<br>community                    | 8 weeks structured circuits exercise training: 3 x 1hr sessions/week. No standard dietary modifications.                                                                                                                                                                                                                                                                                                                                                                                                                        | 2:<br>0                            | All:-0.03                                          | All:-0.57                                           |
| 2 | Bock 2014 <sup>33</sup><br>Canada<br>HIP KIDS          | Cohort:<br>Total = 42 (41)                     | BMI $\geq$ 95 <sup>th</sup> %ile (CDC)                                                        | Age range: 8-17<br>12.8 $\pm$ 3.14; F=50%                                                             | Yes - Tanner              | D+E:<br>Clinic (Hospital)          | Intensive phase (3 mths): bi-wkly 90 min counselling. Maintenance phase (9 months): alternating mthly GP or individual sessions (90 mins). Sessions focus on exercise/psychosocial/behavioural aspects.                                                                                                                                                                                                                                                                                                                         | 12:<br>0                           | All: -0.04                                         | All: -1.39                                          |
| 3 | Bruyndonckz, 2015 <sup>34</sup><br>Belgium             | Quasi-RCT:<br>Total = 61<br>IG = 33<br>CG = 28 | BMI $\geq$ 97 <sup>th</sup> %ile adolescents <16 yrs; BMI $\geq$ 35 adolescents $\geq$ 16 yrs | Age range:12-18<br>IG: 15.4 $\pm$ 1.5; F = 75%<br>CG: 15.1 $\pm$ 1.2; F=75%                           | NR                        | D+E:<br>Clinic (Hospital)          | Intervention: Dietary restriction 1500-1800 kcal/day + 2 hrs/day supervised play/lifestyle activities + 2hrs/wk PE + 3 x 40min/wk supervised training session.<br>Control: Usual care.                                                                                                                                                                                                                                                                                                                                          | 10:<br>0                           | IG: -1.21<br>CG: 0.13                              | IG: -11.30<br>CG: 0.4                               |
| 4 | Bustos 2015 <sup>34</sup><br>Chile                     | Cohort:<br>Total = 50 (28 completed)           | CDC                                                                                           | Age range: NR<br>9.5 $\pm$ 1.9; F=47.6%                                                               | NR                        | D+E:<br>Academic Institution       | Nutrition/behavioural modification session 40 min/wk + PA 50 min x2/wk+ Family support every 15 days for first 2 mths, then mthly.                                                                                                                                                                                                                                                                                                                                                                                              | 8:<br>0                            | All: -0.3                                          | All: -3.00                                          |
| 5 | Calcaterra 2013 <sup>36</sup><br>Italy                 | Cohort:<br>Total = 22                          | BMI > 95 <sup>th</sup> %ile                                                                   | Age range: 9-16<br>13.23 $\pm$ 1.76; F=41%                                                            | Yes - Tanner              | E:<br>Academic Institution         | 2 x 90 mins exercise training sessions/wk                                                                                                                                                                                                                                                                                                                                                                                                                                                                                       | 3:<br>0                            | All: -0.15                                         | All: -3.30                                          |
| 6 | Dobe 2011 <sup>37</sup><br>Germany<br>OBELDICKS – mini | Cohort:<br>Total = 103                         | >97 <sup>th</sup> to 99.5 percentile                                                          | Age range: 4-8<br>6.1 $\pm$ 1<br>F=56%                                                                | NR                        | D+E:<br>Academic Institution       | Obeldicks mini: focus on training parents (22.5 hrs for parents, 4.5 hrs for children). Group sessions. Parents+children classes every 4 <sup>th</sup> session,<br>Children's classes: 9 x monthly sessions (30 mins): 1 x introduction; 3 x diet; 5 x eating habits<br>Parenting classes: 13 x monthly sessions (1.5 hrs): 1x introduction 1x medicine 3x nutrition 5x eating habits + education tips<br>3x discussion circle<br>Individual consultation: every 2 months (30 mins)<br>Exercise: 50 x weekly sessions (1.5 hrs) | 12:<br>0                           | Obeldicks-mini: -0.46                              | Obeldicks-mini: -3.00                               |
| 7 | Farpour-Lambert, 2009 <sup>38</sup><br>Switzerland     | RCT:<br>Total = 44<br>IG= 22<br>OC=22          | BMI > 97 <sup>th</sup> %ile                                                                   | Age range: 6-11<br>8.9 $\pm$ 1.5<br>IG: F=59%<br>OC: F= 68%                                           | Yes                       | E<br>Clinic (Hospital)             | 180 min/wk PA + 135 min/wk PE                                                                                                                                                                                                                                                                                                                                                                                                                                                                                                   | 3:<br>0                            | IG: -0.1<br>CG: 0                                  | IG: -1.50<br>CG: 0.80                               |
| 8 | Ford, 2010a,b UK <sup>39,40</sup>                      | RCT:<br>Total = 106                            | BMI $\geq$ 95 <sup>th</sup> %ile (CDC)                                                        | Mandometer: 9.0 - 16.9<br>SC: 9.1 - 17.5<br>Mandometer: 12.7 $\pm$ 2.2<br>SC: 12.5 $\pm$ 2.3<br>F=56% | Yes                       | D<br>Clinic (Hospital)             | Mandometer device to regulate rate of eating and total intake vs SC                                                                                                                                                                                                                                                                                                                                                                                                                                                             | 12:<br>0                           | IG:-0.36<br>CG:-0.14                               | IG:-4.60<br>CG:-1.30                                |

1  
2  
3  
4  
5  
6  
7  
8  
9  
10  
11  
12  
13  
14  
15  
16  
17  
18  
19  
20  
21  
22  
23  
24  
25  
26  
27  
28  
29  
30  
31  
32  
33  
34  
35  
36  
37  
38  
39  
40  
41  
42  
43  
44  
45  
46

|    |                                                                                                                        |                                                     |                                                                                                                |                                                                                    |                                                                     |                                          |                                                                                                                                                                                                                                                                                 |                                   |                                        |                                     |
|----|------------------------------------------------------------------------------------------------------------------------|-----------------------------------------------------|----------------------------------------------------------------------------------------------------------------|------------------------------------------------------------------------------------|---------------------------------------------------------------------|------------------------------------------|---------------------------------------------------------------------------------------------------------------------------------------------------------------------------------------------------------------------------------------------------------------------------------|-----------------------------------|----------------------------------------|-------------------------------------|
| 9  | Gajewska, 2016 <sup>41</sup><br>Poland                                                                                 | Cohort:<br>Total = 100                              | BMI SDS > 2                                                                                                    | Age range: 5-10<br>with WL: 8.1(6.8-9.2); F=55%<br>without WL: 8,8(7,3-9.6); F=53% | reported with Tanner stage, any with pubertal development excluded. | D+E:<br>Community & Academic institution | 3-mth intervention, low energy diet (1200-1400kcal), 3-5 meals every day, instructions concerning PA, 10-14 food day diary, 3-day food diary.                                                                                                                                   | 3:<br>0                           | WL: -0.98<br>No WL:-0.2                | WL:-2.90<br>No WL:0.30              |
| 10 | Garanty-Bogacka, 2011 <sup>42</sup><br>Poland                                                                          | Cohort:<br>Total = 50                               | BMI > 97 <sup>th</sup> %ile<br>(Polish ref pop.)                                                               | Age range:8-18<br>14.2 ± 2.6; F=58%                                                | Yes                                                                 | D+E:<br>Clinic (Hospital)                | Exercise therapy (Instructions in PA + reducing sedentary behaviour) + Reduction in fat and sugar intake.                                                                                                                                                                       | 6:<br>0                           | All:-1                                 | All: -4.70                          |
| 11 | Grønbæk 2012 <sup>43</sup><br>& Kazankov 2014 <sup>44</sup><br>Denmark<br><b>Julemærkehjem met Hobro (same cohort)</b> | Cohort:<br>Total = 117<br>(n=71 attended 12 mth FU) | NR.<br>Obese. BL BMI-SDS: 2.93±0.52                                                                            | Age range: NR<br>12.1 ± 1.3<br>F=56%                                               | NR                                                                  | D+E:<br>Community                        | Individually designed healthy diet + moderately strenuous PA program (at least 1hr/day).                                                                                                                                                                                        | 2.5 month s/10 weeks:<br>12mth FU | All: -0.63                             | All:-4.30                           |
| 12 | Hvidt 2014 <sup>45</sup><br>Denmark                                                                                    | Cohort:<br>Total = 61                               | Children's Obesity Clinic; BMI > 90 <sup>th</sup> %ile (Danish ref pop.) = z-score 1.28. BL BMI-SDS: 2.73±0.60 | Age range:10-18<br>Median: 12.5<br>F=54%                                           | NR                                                                  | D+E:<br>Clinic (Hospital)                | Family-centred approach involving behaviour changing techniques (90 advice and advice strategies on low-calorie diet + activity e.g. 10-20 items aimed to reduce obesity).                                                                                                      | 12:<br>0                          | All: -0.21                             | All: -3.40                          |
| 13 | Kirk, 2005 <sup>46</sup><br>USA                                                                                        | Cohort:<br>Total = 177                              | BMI > 95 <sup>th</sup> %ile                                                                                    | Age range: 5-19<br>9.0 ± 1.5; F=61%                                                | NR                                                                  | D+E:<br>Clinic (Hospital)                | Behavioural intervention with individualised behavioural goals for nutrition, PA & family support.                                                                                                                                                                              | 5:<br>6                           | GP1: -0.18<br>GP2: -0.13<br>All: -0.15 | GP1:-2.10<br>GP2:-2.40<br>All:-2.20 |
| 14 | Klijn 2007 <sup>47</sup><br>The Netherlands                                                                            | Cohort:<br>Total = 15                               | BMI>30                                                                                                         | Age range:10-18<br>14.7(2.1); F=NR                                                 | NR                                                                  | E:<br>Community                          | Aerobic exercise training programme – 12 weeks; 3 x 30-60 min aerobic group sessions/week (2x gym/outdoors, 1 x swimming pool). P.E teacher led. Diverse indoor, outdoor and swimming activities.                                                                               | 3:<br>0                           | All: -0.4                              | All: -3.80                          |
| 15 | Lazzer 2008 <sup>48</sup><br>Italy                                                                                     | Cohort:<br>Total = 19<br>Boys = 7<br>Girls = 12     | BMI > 97 <sup>th</sup> %ile                                                                                    | Age range: 8-12<br>Boys: 9.9 ±1.6<br>Girls:11.2 ± 1.5<br>Overall F=63%             | Yes – Tanner                                                        | D+E:<br>Community                        | 2 x 50min/wk endurance training + 2hr/wk PE lessons + 1 x wk child & parent dietetic class + 1 x wk psychological group class.                                                                                                                                                  | 8:<br>12                          | Boys: -0.4<br>Girls: -0.2              | Boys: -4.00<br>Girls:-2.20          |
| 16 | Meyer 2006 <sup>49</sup><br>Germany                                                                                    | RCT:<br>Total = 67<br>IG=33<br>OC=34                | BMI > 97 <sup>th</sup> %ile<br>(German paediatric population)                                                  | Age range: 11-16<br>IG: 13.7 ± 2.1; F=48%<br>OC: 14.1 ± 2.4; F =50%                | Yes - Tanner                                                        | E:<br>Clinic (Hospital)                  | 3 x exercise sessions (Monday: swimming and aqua aerobic training 60 min + Wednesday sports games 90 min + Friday walking 60 min)/wk;<br>Control: Maintain current level of PA                                                                                                  | 6:<br>0                           | IG: -0.43<br>CG: -0.14                 | IG:-1.00<br>CG: 0.00                |
| 17 | Miraglia 2015 <sup>50</sup><br>Brazil                                                                                  | Cohort:<br>Total = 27                               | BMI z-score > 2                                                                                                | Age range: 6-13<br>Median 10.3; F=48%                                              | NR                                                                  | D+E:<br>Clinic (Hospital)                | AmO: Outpatient Ambulatory. Obesity outpatient clinic - lifestyle change based on goals agreed relative to feeding habits & physical exercise, followed mthly. 12 mths: Subjects assessed at inclusion & after 12 mths of FU to obtain anthropometric & adipokine measurements. | 12:<br>0                          | All: -0.4                              | All: -0.10                          |

1  
2  
3  
4  
5  
6  
7  
8  
9  
10  
11  
12  
13  
14  
15  
16  
17  
18  
19  
20  
21  
22  
23  
24  
25  
26  
27  
28  
29  
30  
31  
32  
33  
34  
35  
36  
37  
38  
39  
40  
41  
42  
43  
44  
45  
46

|    |                                                                                                |                                                                                            |                                                   |                                                                                          |                       |                                 |                                                                                                                                                                                                                                                                                                                                                                                                                 |                   |                                                         |                                                      |
|----|------------------------------------------------------------------------------------------------|--------------------------------------------------------------------------------------------|---------------------------------------------------|------------------------------------------------------------------------------------------|-----------------------|---------------------------------|-----------------------------------------------------------------------------------------------------------------------------------------------------------------------------------------------------------------------------------------------------------------------------------------------------------------------------------------------------------------------------------------------------------------|-------------------|---------------------------------------------------------|------------------------------------------------------|
| 18 | Morell-Azanza 2016 <sup>51</sup><br>Rendo-Urteaga 2015 <sup>52</sup><br>Spain<br>(same cohort) | Cohort:<br>Total = 40<br>Cohort:<br>Total = 12<br>high responders =6<br>low responders = 6 | OW/OB as per Cole <i>et al</i> 2000               | Age range: 7-15<br>Mean =11<br>F=53%                                                     | Yes –<br>Tanner       | D:<br>Clinic (Hospital)         | Moderate energy-restricted diet + nutritional education sessions with dietitian + family involvement.                                                                                                                                                                                                                                                                                                           | 2.5:<br>0         | HR:-0.79<br>LR: -0.18<br><br>HR: -0.64<br>LR: -0.07     | HR:-3.10<br>LR: -0.60<br><br>HR: -2.49<br>LR: -0.37  |
| 19 | Murer 2011 <sup>53</sup><br>Aeberli, 2010 <sup>54</sup><br>Switzerland<br>(same cohort)        | Cohort:<br>Total = 206 (197)                                                               | BMI > 98 <sup>th</sup> %ile                       | Age range:10-18<br>14.1 ± 1.9; F=42%                                                     | NR                    | D+E:<br>Clinic/hospital         | Moderate caloric restriction.2 x 60-90min/day endurance exercise + 4-5 hr/wk. exercise session + behaviour modification.                                                                                                                                                                                                                                                                                        | 2:<br>0           | All: -0.42                                              | All: -5.50                                           |
| 20 | Murdolo 2017 <sup>55</sup><br>Italy                                                            | Cohort:<br>Total = 53                                                                      | NR                                                | Age range: 5-13<br>Responders: 9.0 ± 1.1;<br>F=50%<br>Non-responders: 2.09 ± 0.32; F=33% | Yes -<br>Tanner       | D+E:<br>Community               | Educational Wt Excess Reduction Program                                                                                                                                                                                                                                                                                                                                                                         | 24:<br>>6<br>mths | Responders<br>:<br>-0.44<br>Non-<br>responders:<br>0.11 | Responders<br>:-2.90<br>Non-<br>responders:<br>-2.00 |
| 21 | Ning 2014 <sup>56</sup><br>& BEAN 2011 <sup>57</sup><br>USA<br>TEENS<br>(same cohort)          | Cohort:<br>Total = 145**                                                                   | BMI ≥ 95 <sup>th</sup> %ile<br>(CDC)              | Age range: 11-18<br>13.1<br>F=65%                                                        | NR                    | D+E:<br>Academic<br>Institution | 12 x 30 min nutritional session with adolescent and parent/s + Education/behavioural support sessions once every 2 wks, or alternating wks + PA 3 x 60 min/wk during initial 12 wks, then minimum of twice/wk.                                                                                                                                                                                                  | 6:<br>0           | All: -0.1                                               | All: -2.40                                           |
| 22 | Pacifico 2013 <sup>58</sup><br>Italy                                                           | Cohort:<br>Total = 120                                                                     | BMI > 95 <sup>th</sup> %ile                       | Age range: (11.5-12.2)<br>11.9; F=35%                                                    | Yes<br>(method<br>ND) | D+E:<br>Clinic (Hospital)       | Hypocaloric diet (25-30 Kcal/kg/day) + 60 min/day ~ 5 days/wk moderate exercise + Reduce sedentary behaviour.                                                                                                                                                                                                                                                                                                   | 12:<br>0          | All: -0.32                                              | All: -2.10                                           |
| 23 | Racil 2013 <sup>59</sup><br>Tunisia                                                            | RCT:<br>Total = 34<br>HIIT=11<br>MIIT=11<br>OC=12                                          | BMI > 97 <sup>th</sup> %ile<br>(French standards) | Age range: NR<br>HIIT: 15.6 ± 0.7<br>MIIT: 16.3 ± 0.52<br>OC:15.9 ±1.2<br>Overall F=100% | Yes -<br>Tanner       | D+E:<br>Community               | 4-day diet records + HIIT or MIIT. Interval training program 3 x /wk on non-consecutive days.                                                                                                                                                                                                                                                                                                                   | 3:<br>0           | HIT: -0.4<br>MIT: -0.3<br>OC: 0                         | HIT: -2.90<br>MIT:-2.00<br>OC: -0.40                 |
| 24 | Racil 2016 <sup>60</sup><br>Tunisia                                                            | RCT:<br>Total = 47<br>HIIT =17<br>MIIT16<br>OC =14                                         | BMI > 97 <sup>th</sup> %ile<br>(French standards) | Age range: NR<br>14.2 ± 1.2; F=100%                                                      | NR                    | E:<br>Academic<br>Institution   | HIIT (Warm up + Interval training at 100%/50% MAS + Cooling down);<br>MIIT (Warm up + Interval training 80%/50% MAS + Cooling down)                                                                                                                                                                                                                                                                             | 3:<br>0           | HIT: -0.3<br>MIT: -0.3<br>OC: 0                         | HIT:- -3.90<br>MIT:-3.40<br>OC: -0.50                |
| 25 | Reinehr 2004a <sup>61</sup><br>Germany<br>OBELDICKS                                            | Cohort:<br>Total = 42                                                                      | BMI ≥ 97 <sup>th</sup> %ile                       | Age range: 6.1-15.1<br>10.2; F=57%                                                       | Yes -<br>Tanner       | D+E:<br>Clinic (Hospital)       | Obeldicks: Intensive phase 3 mths (Parents' course 2x/month + Behaviour therapy 2x/month + Nutritional course 2x/month + Exercise therapy 1x/wk) + Establishing phase 3 mths (Talk rounds for parents 1x/month + Psychological therapy + Exercise therapy 1x/wk) + Establishing phase 2 for 3 mths (Psychological therapy + Exercise therapy 1x/wk) + Establishing phase 3 for 3 mths (Exercise therapy 1x/wk). | 12:<br>0          | Sig. WL-0.9<br>NS WL: -0.2                              | Sig. WL:-<br>7.50<br>NS WL:-<br>3.00                 |



1

2

3

4

5

6

7

8

9

10

11

12

13

14

15

16

17

18

19

20

21

22

23

24

25

26

27

28

29

30

31

32

33

34

35

36

37

38

39

40

41

42

43

44

45

46

|    |                                                                                                         |                                                                                                            |                                                                                                                                                                                                                  |                                                                                                                                                                   |                 |                                                    |                                                                                                                                                                                                                                                                                                                                                                                                                                                                                                              |                                   |                                                |                                                |
|----|---------------------------------------------------------------------------------------------------------|------------------------------------------------------------------------------------------------------------|------------------------------------------------------------------------------------------------------------------------------------------------------------------------------------------------------------------|-------------------------------------------------------------------------------------------------------------------------------------------------------------------|-----------------|----------------------------------------------------|--------------------------------------------------------------------------------------------------------------------------------------------------------------------------------------------------------------------------------------------------------------------------------------------------------------------------------------------------------------------------------------------------------------------------------------------------------------------------------------------------------------|-----------------------------------|------------------------------------------------|------------------------------------------------|
| 26 | Reinehr, 2008a,<br>b <sup>62,63</sup><br>Germany<br><b>OBELDICKS</b>                                    | Cohort:<br>RBP4<br>Total = 43 (+ n=19<br>lean)<br>Fetuin-A<br>Total = 34 (+ n=14<br>lean)                  | IOTF using pop. -<br>specific data                                                                                                                                                                               | Ob: 10.8 ± 2.6; F=61%<br>Lean C: 10.3±2.9; F=58%<br>Ob+NAFLD: 11.2 ± 2.8;<br>F=61%<br>Ob + norm. wt; F=33%<br>NAFLD: 10.2 ± 2.0;<br>F=67%<br>C: 10.3 ± 2.9, F=64% | Yes -<br>Tanner | D+E:<br>Clinic (Hospital)                          | Obeldicks                                                                                                                                                                                                                                                                                                                                                                                                                                                                                                    | 12:<br>0                          | WL: -0.6<br>No WL: -0.1                        | WL: -8.00<br>No WL:0.00                        |
| 27 | Rohrer 2008 <sup>64</sup><br>Germany<br><b>Fit Kids</b>                                                 | Cohort:<br>Total = 22                                                                                      | BMI > 99.5 <sup>th</sup> %ile<br>(German standard<br>values) or BMI > 97 <sup>th</sup><br>%ile with obesity-<br>associated risk<br>factors or BMI > 90 <sup>th</sup><br>%ile with obesity-<br>associated disease | Age range: 7-15<br>Median: 11.9<br>F=27%                                                                                                                          | NR              | D+E:<br>Community                                  | Physical exercise (2 x wk, 100 hrs in total) + Nutritional/health<br>education and psychological care for the child (x wk, 43.5 hrs total)<br>and parent/s (2 x wk, 12 hrs total).                                                                                                                                                                                                                                                                                                                           | 12:<br>0                          | Increased<br>BMI: 0.12<br>Reduced<br>BMI:-0.35 | Increased<br>BMI: 1.05<br>Reduced<br>BMI:-0.05 |
| 28 | Rolland-Cachera<br>2004 <sup>65</sup><br>France                                                         | RCT:<br>Total = 99<br>PROT- = 61 (53)<br>PROT+ = 60 (46)                                                   | BMI > 97 <sup>th</sup> %ile<br>(French reference<br>values)                                                                                                                                                      | Age range: 11-16<br>PROT- = 14.1 ± 1.2; F =<br>74%<br>PROT+ = 14.4 ± 1.3; F =<br>72%                                                                              | NR              | D+E:<br>Academic<br>Institution                    | Wt reducing diet; 7hr/wk vigorous sports + 7hr/wk outdoor<br>activities; advice on nutrition & PA during wkends/holidays.                                                                                                                                                                                                                                                                                                                                                                                    | 9:<br>12 + 24                     | PROT- :-2.6<br>PROT+:-2.5                      | PROT- :-<br>12.40<br>PROT+:-<br>12.10          |
| 29 | Roth 2016 <sup>66</sup><br>Germany<br><b>OBELDICKS</b>                                                  | Cohort:<br>Total = 69                                                                                      | OB as per IOTF<br>criteria                                                                                                                                                                                       | NR – (see Obeldicks age<br>range)<br>Ob with WL: 11.8 ± 2.0;<br>F=50%<br>Ob without WL: 12.1 ±<br>2.1; F=51%<br>Normal wt: 12.3 ± 3.0;<br>F=45%                   | Yes -<br>Tanner | D+E:<br>Clinic (Hospital)                          | Obeldicks                                                                                                                                                                                                                                                                                                                                                                                                                                                                                                    | 12:<br>0                          | WL: -0.69<br>No WL:<br>0.03                    | WL: -9.60<br>No WL:<br>-4.30                   |
| 30 | Savoye 2005 <sup>67</sup><br>USA<br><b>Bright Bodies</b>                                                | Cohort:<br>Total = 25 SMP=10<br>BFC = 23                                                                   | BMI ≥ 95 <sup>th</sup> %ile                                                                                                                                                                                      | Age range: 11-16<br>13.5 ± 0.3;<br>SMP:13.3 ± 0.6; F=75%<br>BFC: 13.6 ± 0.3; F= 65%                                                                               | NR              | D+E:<br>Academic<br>Institution                    | Bright Bodies Weight Management Program: nutrition education,<br>exercise, behavioural modification.<br>2 x 30 min exercise sessions + 1 x 45 min nutrition/behaviour<br>medication group session per week. 4 levels: Beginner, Intermediate<br>i, Intermediate ii, Advanced. All levels 12 weeks duration.<br>Mthly maintenance classes after 1 yr (support-group style)                                                                                                                                    | 12:<br>12                         | SMP: -0.36<br>BFC: -0.12                       | SMP:-6.50<br>BFC: -4.20                        |
| 31 | Savoye 2007,<br>2011 <sup>68,69</sup><br>USA<br><b>Bright Bodies</b><br>(data taken from<br>2011 paper) | RCT+ Long term FU<br>results (cohort)<br>RCT Total = 174<br>BB=105<br>CC=69<br>FU Total = 76 at 24<br>mths | BMI ≥ 95 <sup>th</sup> %ile<br>(CDC)                                                                                                                                                                             | Age range: 8-16<br>BB: 12.0 ± 2.5; F=55%<br>CC: 12.5 ± 2.3; F=68%<br><br>FU cohort:<br>13.9 ± 2.4; F=62%                                                          | NR              | D+E:<br>Academic<br>Institution (local<br>school). | Bright Bodies Weight Management Program: nutrition education,<br>exercise, behavioural modification. 2 x sessions/wk for 6 mths, then<br>biweekly for next 6 mths. BB: 2x50 min exercise + 1x40 min<br>nutrition/behaviour modification per wk + 12 mths no active<br>intervention.<br>Control group: standard care – paed. obesity clinic (biannual clinic<br>appt; diet + exercise counselling) Structured tx & teaching program<br>(28 x 45 min therapeutic sessions e.g. PA, nutrition, healthy cooking) | 12:<br>12<br><br>FU<br>1.5:<br>24 | IG: -0.21<br>CG: 0.01                          | IG: -3.90<br>CG: 2.10                          |

1  
2

|    |                                                                                                 |                                                                  |                                                            |                                                                                                       |                 |                                 |                                                                                                                                                                                                                                                                                                                                                            |            |                                         |                                           |
|----|-------------------------------------------------------------------------------------------------|------------------------------------------------------------------|------------------------------------------------------------|-------------------------------------------------------------------------------------------------------|-----------------|---------------------------------|------------------------------------------------------------------------------------------------------------------------------------------------------------------------------------------------------------------------------------------------------------------------------------------------------------------------------------------------------------|------------|-----------------------------------------|-------------------------------------------|
| 32 | Savoye 2014 <sup>70</sup><br>USA<br><b>Bright Bodies</b>                                        | RCT<br>Total = 75<br>BB=38 (31)<br>CC=37 (27)                    | BMI ≥ 95 <sup>th</sup> %ile                                | Age range:10-16<br>BB: 12.7 (1.9); F=68%<br>CC: 13.2 (1.8); F=62%                                     | Yes-<br>Tanner  | D+E:<br>Academic<br>Institution | Bright Bodies Weight Management Program: nutrition education, exercise, behavioural modification. 2 x 30 min exercise sessions + 1 x 45 min nutrition/behaviour medication group session per week. 4 levels: Beginner, Intermediate I, Intermediate ii, Advanced. All levels 12 weeks duration. Mthly maintenance classes after 1 yr (support-group style) | 6:<br>0    | BB: -0.05<br>CC: 0.04                   | BB: -3.30<br>CC: 0.40                     |
| 33 | Schiel 2016 <sup>71</sup><br>Germany                                                            | Cohort:<br>Total=143                                             | BMI-SDS ≥97 <sup>th</sup> %ile                             | Age range: NR<br>13.9 ± 2.4; F=62%                                                                    | NR              | D+E:<br>Clinic (Hospital)       | Structured Tx & Teaching Program (STTP):<br>28 x 45 min therapeutic sessions e.g. PA, nutrition, healthy cooking                                                                                                                                                                                                                                           | 1.5:<br>24 | All: -0.26                              | All: -3.40                                |
| 34 | Seabra 2016 <sup>72</sup><br>Portugal                                                           | Cohort:<br>Total = 88<br>soccer =29<br>Trad. Act. =29<br>OC =30  | BMI-SDS > 2                                                | Age range: 8-12<br>Soccer: 10.5 ± 1.5<br>Trad. act: 11.0 ± 1.6<br>OC=10.0 ±1.3<br>Overall F=0%        | Yes -<br>Tanner | E:<br>Community                 | Soccer & trad. activity programmes (3 x 60-90min/wk) + 2 x 1hr at BL & 3 mths later energy balance session.                                                                                                                                                                                                                                                | 6:<br>0    | Soccer: -0.2<br>Trad.: -0.2<br>CG: -0.1 | Soccer:-<br>2.20<br>Trad:-4.10<br>CG:3.10 |
| 35 | Truby 2016 <sup>73</sup><br>Australia                                                           | RCT:<br>Total = 87<br>SMC=37 (33)<br>SLF=36 (32)<br>WList OC =14 | BMI > 90 <sup>th</sup> %ile<br>(CDC)                       | Age range: 10-17<br>SMC: 13.2 ± 1.9; F=73%<br>SLF: 13.2 ± 2.1; F=72%<br>WList OC: 13.6 ±1.9;<br>F=71% | Yes -<br>Tanner | D:<br>Clinic (Hospital)         | Structured modified CHO diet (35% CHO; 30% protein; 35% fat), structured low-fat diet (55% CHO; 20% protein; 25% fat), Control (no dietary advice).                                                                                                                                                                                                        | 3:<br>0    | SLF: -0.09<br>SMC:-0.15<br>CG: 0.02     | SLF: -0.13<br>SMC: -0.40<br>CG: 2.62      |
| 36 | Van der Baan-Slootweg 2014 <sup>74</sup><br>Netherlands                                         | RCT:<br>Total = 90<br>Inpt. = 45 (37)<br>AmO = 45 (36)           | BMI z score ≥ 3.0 or > 2.3 with OB-related health problems | Age range: 8-18<br>Inpt: 13.8 ± 2.3; F=58%<br>AmO: 13.9 ± 2.5; F=58%                                  | NR              | D+E:<br>Clinic (Hospital)       | Inpt. (Hospitalised 26 wks on working days - 4 days/wk 30-60min exercise + nutrition/BM once/wk + parents/caregivers 3 x 1hr lesson on nutrition/BM); Ambulatory (12 visits at increasing time intervals - 1 hr exercise session + encouraged 3 x exercise/wk + 1 hr educational programme + 30 min nutrition education).                                  | 6:<br>24   | InpT: -0.6<br>AmO: -0.35                | InP: -3.34<br>AmO:-7.87                   |
| 37 | Visuthranukul 2015 <sup>75</sup><br>Thailand                                                    | RCT:<br>Total = 70 (52)<br>I =35(25)<br>OC=35 (27)               | ND.<br>BL BMI z-score:<br>I = 3.7 ±0.9<br>C = 3.6±1.6      | Age range: 9-16<br>I = 11.9 ± 1.9; F=36%<br>C = 12.0 ± 2.1; F=30%                                     | Yes -<br>Tanner | D:<br>Clinic (Hospital)         | I (Low GI diet + Energy restriction 1400-1500 kcal/day + Increased exercise);<br>OC (Energy restriction 1200-1300 kcal/day + Low fat/high fibre diet + Increased exercise).                                                                                                                                                                                | 6:<br>0    | IG:-0.3<br>CG: -0.3                     | IG:0.10<br>CG:0.10                        |
| 38 | Vitola 2009 <sup>76</sup><br>USA                                                                | Cohort:<br>Total = 8(7)                                          | BMI ≥ 95 <sup>th</sup> %ile                                | Age range: NR<br>15.3± 0.6; F=12.8%                                                                   | Yes -<br>Tanner | D+E:<br>Clinic (Hospital)       | Individual behavioural therapy sessions with psychologist. Parents involvement encouraged. Self-monitoring of PA & food intake. Gradual reduction of caloric intake to ≈1200-1500 kcal/day. Ongoing therapy - wt loss therapy repeated when 5% body wt lost & wt stable for at least 4 wks                                                                 | NR         | All: -0.3                               | All: -5.30                                |
| 39 | Wickham, 2009 <sup>77</sup><br>& Evans, 2009 <sup>78</sup><br>USA<br><b>TEENS (same cohort)</b> | Cohort:<br>Total = 168 (64) *                                    | BMI ≥ 95 <sup>th</sup> %ile<br>(CDC)                       | Age range: 11-18<br>13.4 ± 1.8; F=60%<br>13.9 ± 1.9; F=62%                                            | NR              | D+E:<br>Academic<br>Institution | Exercise 1 day/wk at facility + 2 additional exercise days at facility of ppts' choice + 30 min/wk nutrition education/behavioural support sessions.                                                                                                                                                                                                       | 6:<br>0    | Completers<br>:<br>-0.07                | Completers<br>:-1.30                      |

**KEY:** %ile = percentile; AmO = Outpatient Ambulatory; An. = analysed; apt. = appointment; BB =Bright Bodies; BFC = Better food choices; BL = baseline; BM = behaviour modification; BMI= body mass index; C = control; CG: control group; CBT = cognitive behavioural therapy; CDC = Centre for Disease Control; CG = control group; CHO = carbohydrate; D = diet; E = exercise; FBBT = family-based behavioural treatment; F = female; FU = follow up; GI = glycaemic index; GT = group therapy; HGI = high glycaemic index; hr = hour; HZ = heterozygous; HO = homozygous; ht = height; I = intervention; IG= intervention group; IOTF = International Obesity Task Force; Inpt. = inpatient; LGI = low glycaemic index; LMS= least-mean-squares; LS = long stay; min= minute; mth = month; MO = morbidly obese; norm. normal; n = number; NAFLD = Non-alcoholic fatty liver disease; ND = not described; NR = not reported; OB = obese; OC =

1  
2  
3  
4  
5  
6  
7  
8  
9  
10  
11  
12  
13  
14  
15  
16  
17  
18  
19  
20  
21  
22  
23  
24  
25  
26  
27  
28  
29  
30  
31  
32  
33  
34  
35  
36  
37  
38  
39  
40  
41  
42  
43  
44  
45  
46

obese control; OW = overweight; paed. = paediatric; PA = physical activity; PE = physical activity; PROT= protein; RCT = randomised controlled trial; SD = standard deviation; SDS = standard deviation score; SMP= Structured meal plan; SS= short stay; SMC= structured modified carbohydrate diet; trad. = traditional; Trad. act = traditional activity; tx = treatment; wk = week; WList OC– wait list obese control; WL = weight loss; wt = weight; X-over = crossover; yr = year

\*studies with change in % body fat included in the analysis  
\*\*minor discrepancies in reporting of data in papers

N.B. For studies reported in multiple publications, the reference that provided the most comprehensive information has been used (*thus Ning et al 2014<sup>56</sup> includes data from Bean et al 2011<sup>57</sup>; Evans et al 2009<sup>78</sup> is reported under Wickham et al 2009<sup>77</sup>, Aeberli et al 2010<sup>54</sup> is reported under Murer et al 2011<sup>53</sup>; Rendo-Urtega et al 2015<sup>52</sup> is reported under Morell-Azanza et al<sup>51</sup> and Kazankov et al 2014<sup>44</sup> is reported under Grønbaek et al 2012<sup>43</sup>*).

For peer review only

1  
2  
3 *Narrative description of studies that reported BMI-SDS and percentage body fat*  
4

5 Of the 39 studies that reported percentage body fat included in our analysis, seven were  
6 conducted in both Germany and USA, four in Italy, followed by Australia (n=2), Denmark (n=2),  
7 Netherlands (n=2), Poland (n=2), Switzerland (n=2), Tunisia (n=2) and one each in Belgium,  
8 Brazil, Canada, Chile, France, Portugal, Spain, Thailand and the UK. There were country-  
9 specific variations in the definition of obesity, with most studies defining obesity by participants  
10 having a BMI-SDS > 2, or a BMI percentile of at least > 90th percentile. Most of studies utilised  
11 a cohort design (n = 27), 11 were randomised controlled trials (RCTs), of which one included  
12 results from a cohort of the original RCT. There was also one study which adopted a quasi-  
13 randomised design.  
14  
15  
16  
17  
18  
19  
20  
21  
22  
23  
24  
25  
26  
27

28 Most studies (n=20) conducted their intervention in the hospital clinic setting. Eight studies  
29 conducted the intervention in the community setting and ten in academic institutions. One  
30 conducted the intervention in mixed setting, reporting use of both a community setting and  
31 academic institution.  
32  
33  
34  
35  
36  
37  
38  
39

40 Twenty-eight studies conducted interventions that comprised both diet and exercise components.  
41 The remaining studies (n=11) utilised interventions that focused either on exercise or diet only.  
42 The duration of the interventions ranged from 15 days to 24 months. The majority of studies  
43 (n=29; 74%) did not report any follow-up after the lifestyle treatment intervention. The duration  
44 of follow-up in the studies where it was conducted and reported, ranged from 6 months to 2  
45 years.  
46  
47  
48  
49  
50  
51  
52  
53

54 The sample sizes of the included studies ranged from 8 to 203 participants. The age of the  
55 participants ranged from 4 to 19 years. Studies predominantly had a mix of males and females  
56  
57  
58  
59  
60

1  
2  
3 (95%) with only three studies specifically focused on either only girls<sup>59,60</sup> or boys<sup>72</sup>. Seventeen  
4  
5 studies (44%) measured pubertal development of participants according to Marshall and Tanner  
6  
7 staging, with pubertal status categorised into three groups: prepubertal, pubertal, and late/post-  
8  
9 pubertal<sup>79</sup>. Four studies (10%) reported that pubertal development was measured but the  
10  
11 methodology was not defined. Eighteen studies (46%) did not report any measures of pubertal  
12  
13 development.  
14  
15

### 16 17 18 19 *Quality Assessment*

20  
21 The quality of the conduct of each study was assessed using the same criteria as the HTA  
22  
23 systematic review of the long-term effects and economic consequences of treatments for obesity  
24  
25 and implications for health improvement<sup>30</sup>. The results of the quality assessment can be found in  
26  
27 Table 2. In summary, none of the 39 studies that reported percentage body fat were considered  
28  
29 to be of poor quality, 21 studies (54%) were rated as being of moderate quality and 18 studies  
30  
31 (46%) achieved a score over 81% indicating high quality.  
32  
33  
34  
35  
36  
37  
38  
39  
40  
41  
42  
43  
44  
45  
46  
47  
48  
49  
50  
51  
52  
53  
54  
55  
56  
57  
58  
59  
60

Table 2: Quality Assessment of included studies

|    |                                        | SAMPLE                 |                          |                               |                                          |                                                  |                                   | CONDUCT OF STUDY                                  |                                |                                     |                                                 | FOLLOW-UP                  |                              | ANALYSIS                             |                                          |                        |                                             | INTERPRETATION                             |                                                    |                                              |                                       |              |                |
|----|----------------------------------------|------------------------|--------------------------|-------------------------------|------------------------------------------|--------------------------------------------------|-----------------------------------|---------------------------------------------------|--------------------------------|-------------------------------------|-------------------------------------------------|----------------------------|------------------------------|--------------------------------------|------------------------------------------|------------------------|---------------------------------------------|--------------------------------------------|----------------------------------------------------|----------------------------------------------|---------------------------------------|--------------|----------------|
|    | Author, Year,                          | 1. Aims clearly stated | 2. sample size justified | 3. Age of participant defined | 4. Measurements at start clearly stated? | 5. Measurements likely to be valid and reliable? | 6. Risk factors recorded clearly? | 7. Was the intervention before follow-up defined? | 8. Setting of the study clear? | 9. Is mode of assessment described? | 10. Did untoward events occur during the study? | 11. Was there a follow up? | 12. Was follow up necessary? | 13. Are losses to follow up defined? | 14. Was basic data adequately described? | 15. Do numbers add up? | 16. Did analysis allow for passage of time? | 17. Was statistical significance assessed? | 18. Were the main findings interpreted adequately? | 19. Were null/negative findings interpreted? | 20. Are important effects overlooked? | Total (x/40) | Overall rating |
| 1  | Bell 2007                              | Yes                    | Yes                      | Yes                           | Yes                                      | Yes                                              | No                                | Yes                                               | ?                              | Yes                                 | No                                              | No                         | Yes                          | Yes                                  | Yes                                      | Yes                    | Yes                                         | Yes                                        | Yes                                                | No                                           | 35                                    | 87.5         |                |
| 2  | Bock 2014                              | Yes                    | No                       | Yes                           | Yes                                      | Yes                                              | No                                | Yes                                               | Yes                            | Yes                                 | No                                              | Yes                        | Yes                          | Yes                                  | Yes                                      | Yes                    | Yes                                         | Yes                                        | Yes                                                | No                                           | 36                                    | 90           |                |
| 3  | Bruyndonckz 2015                       | Yes                    | No                       | Yes                           | Yes                                      | Yes                                              | No                                | Yes                                               | Yes                            | Yes                                 | No                                              | Yes                        | Yes                          | Yes                                  | Yes                                      | Yes                    | Yes                                         | Yes                                        | Yes                                                | No                                           | 36                                    | 90           |                |
| 4  | Bustos 2015                            | Yes                    | No                       | Yes                           | Yes                                      | Yes                                              | No                                | Yes                                               | Yes                            | Yes                                 | No                                              | Yes                        | No                           | Yes                                  | Yes                                      | Yes                    | Yes                                         | Yes                                        | No                                                 | No                                           | 30                                    | 75           |                |
| 5  | Calcaterra 2013                        | Yes                    | No                       | Yes                           | Yes                                      | Yes                                              | No                                | Yes                                               | Yes                            | Yes                                 | No                                              | Yes                        | No                           | Yes                                  | Yes                                      | Yes                    | Yes                                         | Yes                                        | ?                                                  | No                                           | 31                                    | 77.5         |                |
| 6  | Dobe 2011                              | ?                      | No                       | Yes                           | ?                                        | ?                                                | No                                | Yes                                               | ?                              | ?                                   | No                                              | No                         | Yes                          | No                                   | Yes                                      | Yes                    | Yes                                         | Yes                                        | ?                                                  | No                                           | 26                                    | 65           |                |
| 7  | Farpour-Lambert, 2009                  | Yes                    | Yes                      | Yes                           | Yes                                      | Yes                                              | No                                | Yes                                               | ?                              | Yes                                 | No                                              | Yes                        | Yes                          | Yes                                  | Yes                                      | Yes                    | Yes                                         | Yes                                        | Yes                                                | No                                           | 37                                    | 92.5         |                |
| 8  | Ford, 2010a, b                         | Yes                    | Yes                      | Yes                           | Yes                                      | Yes                                              | No                                | Yes                                               | Yes                            | Yes                                 | ?                                               | Yes                        | Yes                          | Yes                                  | Yes                                      | Yes                    | Yes                                         | Yes                                        | Yes                                                | ?                                            | 35                                    | 87.5         |                |
| 9  | Gajewska, 2016                         | Yes                    | No                       | Yes                           | Yes                                      | Yes                                              | No                                | Yes                                               | Yes                            | Yes                                 | No                                              | No                         | Yes                          | No                                   | Yes                                      | Yes                    | Yes                                         | Yes                                        | Yes                                                | ?                                            | No                                    | 31           | 77.5           |
| 10 | Garanty-bogacka, 2011                  | Yes                    | No                       | Yes                           | Yes                                      | Yes                                              | ?                                 | ?                                                 | ?                              | Yes                                 | ?                                               | No                         | ?                            | No                                   | Yes                                      | ?                      | Yes                                         | Yes                                        | ?                                                  | No                                           | 26                                    | 65           |                |
| 13 | Gronbaek 2012; Kazankov 2014           | Yes                    | ?                        | Yes                           | Yes                                      | Yes                                              | No                                | Yes                                               | Yes                            | Yes                                 | No                                              | Yes                        | Yes                          | Yes                                  | Yes                                      | Yes                    | Yes                                         | Yes                                        | Yes                                                | No                                           | 37                                    | 92.5         |                |
| 11 | Hvidt 2014                             | Yes                    | No                       | Yes                           | Yes                                      | Yes                                              | No                                | Yes                                               | Yes                            | Yes                                 | No                                              | Yes                        | Yes                          | Yes                                  | Yes                                      | Yes                    | Yes                                         | Yes                                        | Yes                                                | ?                                            | 34                                    | 85           |                |
| 12 | Kirk, 2005                             | Yes                    | No                       | Yes                           | Yes                                      | Yes                                              | No                                | Yes                                               | Yes                            | Yes                                 | ?                                               | No                         | Yes                          | ?                                    | Yes                                      | Yes                    | Yes                                         | Yes                                        | Yes                                                | ?                                            | ?                                     | 29           | 72.5           |
| 13 | Klijn 2007                             | Yes                    | No                       | Yes                           | Yes                                      | Yes                                              | No                                | Yes                                               | ?                              | Yes                                 | No                                              | No                         | Yes                          | No                                   | No                                       | Yes                    | Yes                                         | Yes                                        | Yes                                                | No                                           | No                                    | 27           | 67.5           |
| 14 | Lazzer 2008                            | Yes                    | No                       | Yes                           | Yes                                      | Yes                                              | No                                | Yes                                               | Yes                            | Yes                                 | No                                              | Yes                        | Yes                          | No                                   | Yes                                      | Yes                    | Yes                                         | Yes                                        | Yes                                                | No                                           | No                                    | 32           | 80             |
| 15 | Meyer 2006                             | Yes                    | No                       | Yes                           | Yes                                      | Yes                                              | No                                | No                                                | Yes                            | Yes                                 | No                                              | No                         | Yes                          | No                                   | Yes                                      | Yes                    | Yes                                         | Yes                                        | Yes                                                | Yes                                          | No                                    | 30           | 75             |
| 16 | Miraglia 2015                          | Yes                    | No                       | No                            | Yes                                      | Yes                                              | No                                | Yes                                               | ?                              | Yes                                 | No                                              | No                         | Yes                          | No                                   | ?                                        | Yes                    | Yes                                         | Yes                                        | ?                                                  | Yes                                          | Yes                                   | 25           | 62.5           |
| 17 | Morell-Azanza 2016; Rendo-Urteaga 2015 | Yes                    | Yes                      | Yes                           | Yes                                      | Yes                                              | No                                | Yes                                               | Yes                            | Yes                                 | No                                              | Yes                        | Yes                          | No                                   | Yes                                      | Yes                    | Yes                                         | Yes                                        | Yes                                                | No                                           | No                                    | 32           | 80             |

1  
2  
3  
4  
5  
6  
7  
8  
9  
10  
11  
12  
13  
14  
15  
16  
17  
18  
19  
20  
21  
22  
23  
24  
25  
26  
27  
28  
29  
30  
31  
32  
33  
34  
35  
36  
37  
38  
39  
40  
41  
42  
43  
44  
45  
46

|    |                            |     |     |     |     |     |    |     |     |     |    |     |     |     |     |     |     |     |     |     |     |           |             |             |
|----|----------------------------|-----|-----|-----|-----|-----|----|-----|-----|-----|----|-----|-----|-----|-----|-----|-----|-----|-----|-----|-----|-----------|-------------|-------------|
| 18 | Murer 2011; Aeberli, 2010  | Yes | Yes | Yes | Yes | Yes | No | Yes | Yes | Yes | No | Yes | Yes | Yes | Yes | Yes | Yes | Yes | Yes | Yes | No  | <b>38</b> | <b>92</b>   |             |
| 19 | Murdolo 2017               | Yes | No  | Yes | Yes | Yes | No | No  | No  | Yes | No | Yes | Yes | No  | Yes | Yes | Yes | Yes | Yes | No  | No  | <b>28</b> | <b>70</b>   |             |
| 20 | Ning 2014; Bean 2011       | Yes | No  | Yes | Yes | Yes | No | Yes | Yes | Yes | No | Yes | Yes | Yes | Yes | Yes | Yes | Yes | Yes | No  | No  | <b>34</b> | <b>85</b>   |             |
| 21 | Pacifico 2013              | Yes | No  | Yes | Yes | Yes | No | Yes | Yes | Yes | No | Yes | Yes | No  | Yes | Yes | Yes | Yes | Yes | Yes | No  | ?         | <b>31</b>   | <b>77.5</b> |
| 22 | Racil 2013                 | Yes | No  | Yes | Yes | Yes | No | Yes | ?   | Yes | No | No  | ?   | No  | Yes | Yes | Yes | Yes | Yes | Yes | Yes | ?         | <b>29</b>   | <b>72.5</b> |
| 23 | Racil 2016                 | Yes | No  | ?   | Yes | Yes | No | Yes | ?   | Yes | No | No  | Yes | No  | Yes | Yes | Yes | Yes | Yes | Yes | No  | No        | <b>28</b>   | <b>70</b>   |
| 24 | Reinehr 2004a              | Yes | No  | Yes | Yes | Yes | No | Yes | Yes | Yes | No | No  | Yes | No  | Yes | Yes | Yes | Yes | Yes | Yes | No  | ?         | <b>29</b>   | <b>72.5</b> |
| 25 | Reinehr, 2008a, b          | Yes | No  | Yes | Yes | Yes | No | Yes | Yes | Yes | No | Yes | Yes | No  | Yes | Yes | Yes | Yes | Yes | Yes | Yes | No        | <b>32</b>   | <b>80</b>   |
| 26 | Rohrer 2008                | Yes | No  | Yes | Yes | Yes | No | Yes | Yes | Yes | No | Yes | Yes | No  | Yes | Yes | Yes | Yes | Yes | Yes | ?   | No        | <b>33</b>   | <b>82.5</b> |
| 27 | Rolland-Cachera 2004       | Yes | No  | Yes | Yes | Yes | No | Yes | Yes | Yes | No | Yes | Yes | Yes | ?   | Yes | Yes | Yes | Yes | Yes | No  | No        | <b>33</b>   | <b>82.5</b> |
| 28 | Roth 2016                  | Yes | No  | Yes | Yes | Yes | No | Yes | No  | Yes | No | No  | Yes | No  | Yes | Yes | Yes | Yes | Yes | Yes | No  | No        | <b>28</b>   | <b>70</b>   |
| 29 | Savoye 2005                | Yes | No  | Yes | Yes | Yes | No | Yes | Yes | Yes | No | Yes | Yes | Yes | Yes | Yes | Yes | Yes | Yes | Yes | No  | No        | <b>34</b>   | <b>85</b>   |
| 30 | Savoye 2007,2011           | Yes | Yes | Yes | Yes | Yes | No | Yes | Yes | Yes | No | Yes | Yes | Yes | Yes | Yes | Yes | Yes | Yes | Yes | No  | No        | <b>36</b>   | <b>90</b>   |
| 31 | Savoye 2014                | Yes | Yes | Yes | Yes | Yes | No | Yes | ?   | Yes | No | No  | Yes | Yes | Yes | Yes | Yes | Yes | Yes | Yes | Yes | No        | <b>35</b>   | <b>87.5</b> |
| 32 | Schiel 2016                | Yes | No  | ?   | Yes | Yes | No | Yes | Yes | Yes | No | Yes | Yes | Yes | Yes | Yes | ?   | Yes | No  | ?   | Yes | <b>29</b> | <b>72.5</b> |             |
| 33 | Seabra 2016                | Yes | Yes | Yes | Yes | Yes | No | Yes | Yes | Yes | No | No  | Yes | Yes | Yes | Yes | Yes | Yes | Yes | Yes | No  | No        | <b>34</b>   | <b>85</b>   |
| 34 | Truby 2016                 | Yes | Yes | Yes | Yes | Yes | No | Yes | Yes | Yes | No | Yes | Yes | Yes | Yes | Yes | Yes | Yes | Yes | Yes | Yes | No        | <b>38</b>   | <b>95</b>   |
| 35 | Van der Baan-Slootweg 2014 | Yes | Yes | Yes | Yes | Yes | No | Yes | Yes | Yes | No | Yes | Yes | Yes | Yes | Yes | Yes | Yes | Yes | Yes | No  | No        | <b>36</b>   | <b>90</b>   |
| 36 | Visuthranukul 2015         | Yes | Yes | Yes | Yes | Yes | No | Yes | Yes | Yes | No | Yes | Yes | Yes | Yes | Yes | Yes | Yes | Yes | Yes | Yes | No        | <b>38</b>   | <b>95</b>   |
| 37 | Vitola 2009                | Yes | No  | Yes | Yes | Yes | No | ?   | ?   | Yes | No | No  | Yes | No  | Yes | Yes | Yes | Yes | Yes | Yes | No  | No        | <b>28</b>   | <b>70</b>   |
| 38 | Wickham, 2009; Evans 2009  | Yes | No  | Yes | Yes | Yes | No | Yes | Yes | Yes | No | Yes | Yes | ?   | Yes | Yes | Yes | Yes | No  | Yes | ?   | <b>30</b> | <b>75</b>   |             |

**DECISION KEY:**

? = Unclear  
For Q6. Were risk factors clearly recorded? We said "No" rather than "unclear" to all the studies that didn't record risk factors;  
For Q10. Did untoward events occur during the study? We said "No" rather than unclear if not mentioned.

**Rating:** Not satisfactory 1-50%; Moderate quality = 51-80%; High quality = 81%

### *Quantitative Analysis*

From the studies that reported percentage body fat, 67 data subsets were identified which documented both a mean change in BMI-SDS/z-score and an associated mean change in percentage body fat or gave pre- and post- 'intervention' values from which these could be calculated as well as the number of cases analysed. Note that 'intervention' here could have been the 'control' arm in some cases. The following studies were excluded from analysis for the following reasons: there were different numbers of participants for BMI-SDS and percentage body fat<sup>90</sup>; five were duplicated in other studies<sup>52,54,57,69, 78</sup>. One further study (3 data sets) was excluded because the standard errors (SEs) were estimated from a Mixed Model and not directly comparable<sup>108</sup>. These excluded studies are reported in Appendix 2.

SEs were required for the mean changes in percentage body fat and, if not given explicitly, were calculated, from either the standard deviations (SDs) or the 95% confidence intervals (CIs) of the mean changes. In total, 23 data sets had SEs. For the remainder, the SEs were estimated from the SDs associated with the baseline and the post-intervention percentage body fat values, making an assumption about the degree of correlation between them. The median and interquartile range (IQR) of the correlation coefficients estimated from the 9 data sets where both the SEs of mean change and the SDs for baseline and post intervention percentage body fat values were available was 0.81 (IQR 0.59-0.82) and 0.81 has been used in the following analysis. A small number of data sets (n=6)<sup>34,41,61</sup> only had medians and IQRs (or range) reported for the baseline and post intervention results; the mean and SDs were estimated from them<sup>80</sup>.

The meta-regression line was fitted and plotted together with the 95% prediction intervals for the change in percentage body fat across the study data sets. The smallest reduction of mean BMI-SDS/z-score associated with a reduction in mean percentage body fat was determined as



1  
2  
3 the smallest reduction in mean BMI-SDS/z-score with an associated 95% prediction interval  
4  
5 wholly below zero.  
6  
7  
8  
9

10  
11 A series of sensitivity analyses were conducted and these are presented in Figure 5. Sensitivity  
12  
13 Analysis 5i: using the 23 cases where the SEs of the mean change in percentage body fat were  
14  
15 actually known, Sensitivity Analysis 5ii: omission of 2 extreme values and Sensitivity Analysis  
16  
17 5iii: assuming a correlation of 0.50 instead of 0.81. In further exploratory analyses, the  
18  
19 percentage of girls and the length of the study (baseline to end of intervention) were added to  
20  
21 see if these affected the prediction of mean change in percentage body fat.  
22  
23  
24  
25  
26

### 27 **Results from the quantitative analysis**

28  
29 Figure 3 shows the results of the analysis and the fitted regression line. The circles represent the  
30  
31 study results (i.e. the mean changes in percentage body fat and mean changes in BMI-SDS/z-  
32  
33 score) analysed for each study, with the size of the circles representing the precision of the mean  
34  
35 change in percentage body fat, i.e. the reciprocal of the SE squared).  
36  
37  
38  
39  
40

41 ***Figure 3: Regression line showing the relationship between mean change in percentage body***  
42 ***fat and BMI-SDS/z-score across the 39 studies (67 subsets) analysed***  
43  
44  
45

46 The fitted regression line shown in Figure 3 is:

47  
48 Mean change in percentage body fat = 5.18 x Mean change in BMI-SDS/z-score - 0.781.  
49  
50  
51

52  
53 The regression slope was statistically significant ( $P < 0.001$ ), confirming a relationship between  
54  
55 the mean loss of percentage body fat and the mean change in BMI-SDS/z-score across the data  
56  
57 subsets; the proportion of the between-subset variance explained by the mean change in BMI-  
58  
59 SDS/z-score (i.e. 'a type of adjusted R-squared') was 68%. There was, however, significant  
60

1  
2  
3 between-subset heterogeneity with 89% of the percentage of the total residual variance  
4 attributable to this, (i.e.  $I^2$ ). It was further noted that when added to the model, neither the  
5 percentage girls in the study sets nor the durations of the interventions significantly improved  
6 the prediction of mean change in percentage body fat from the mean change in BMI-SDS/z-  
7 score (P=0.54, P=0.97 respectively).  
8  
9  
10  
11  
12  
13  
14  
15  
16

17 Figure 3 also shows the 95% prediction intervals for the mean change in percentage body fat.  
18 The upper limit of the prediction interval was below 0 only when the mean reduction in BMI-  
19 SDS/z-score was greater than 0.6, suggesting that any new study should aim to reduce the BMI-  
20 SDS/s-score by at least this amount to be confident of achieving a mean reduction of percentage  
21 body fat.  
22  
23  
24  
25  
26  
27  
28  
29

30 A normal plot for the standardised predicted random effects is shown in Figure 4. Most were  
31 within +/-2 although the data sets themselves were not wholly independent (as some came from  
32 the same studies).  
33  
34  
35  
36  
37  
38

39 ***Figure 4: Normal plot to show the standardised predicted random effects from the meta-***  
40 ***regression***  
41  
42  
43

44 None of the sensitivity analyses conducted (Figure 5) significantly altered the findings, namely  
45 that a mean change of 0.6 or more in BMI z-score was associated with a definitive mean loss in  
46 percentage body fat. In Figure 5(ii), with the exclusion of the two extreme data points, the linear  
47 trend can be seen more clearly across the range of mean BMI z-score losses.  
48  
49  
50  
51  
52  
53  
54

55 ***Figure 5: Sensitivity analyses***  
56  
57  
58  
59  
60

## DISCUSSION

### Summary of main results

This is the first of a series of papers that report on studies identified in a large systematic review. The objective of this paper was to attempt to establish the minimum change in BMI-SDS/z-score needed to achieve improvements in body fat in obese children and adolescents; BMI-SDS/z-score being by far the most frequently reported outcome in terms of weight management trial interventions in childhood. Seventy-three of the 90 included studies reported adiposity measures but in our meta-regression only percentage body fat can be used as a reliable, comparable marker of change of adiposity. Thus, the analyses presented in this paper were conducted using data from 39 studies. All of the included studies were considered to be of moderate to high quality according to the HTA quality assessment tool<sup>30</sup>. Despite there being a positive relationship between mean change in percentage body fat and mean change in BMI-SDS, our modelling suggested that, in order to be confident of effecting a mean loss in percentage body fat, any future study should aim to reduce the BMI-SDS/z-score by at least 0.6.

### Strengths and limitations

We believe that this is the first paper to attempt to bring together all studies that have reported both a change in BMI-SDS/z-score and changes in a marker of adiposity in the obese paediatric population. The systematic methods employed to identify the included studies were stringent, but it is possible that some relevant studies might have been missed. In addition, there was some variation in the reporting of results where there were multiple publications of the same study; in these cases, the results from the most comprehensive paper have been used. An important limitation to address in the broader context going forward, is whether BMI-SDS/Z-

1  
2  
3 scores are the best way to represent changes in BMI at extremes of body weight. This has been  
4  
5 addressed in a recent article by Freedman et al demonstrating that there are better measures of  
6  
7 adiposity in severe obesity, such as percentage of 95<sup>th</sup> percentile BMI (%BMI<sup>p95</sup>) or distance  
8  
9 in Kg/m<sup>2</sup> from the 95<sup>th</sup> percentile ( $\Delta$  BMI<sup>p95</sup>)<sup>119</sup>. However, we based this analysis on the data  
10  
11 available to us which was almost entirely reported in terms of BMI-SDS/z-scores.  
12  
13

14 It has been suggested that the relationship between change in percentage body fat and change  
15  
16 in BMI-SDS/z-score may differ between very young and older children<sup>120</sup>). Our inclusion  
17  
18 criteria stipulated ages from 4 to 19 years. Most of the studies spanned a wide range of ages  
19  
20 (see Table 1) and we did not have access to individual child data to facilitate stratification by  
21  
22 age. Data from two studies based specifically on younger children<sup>37,41</sup> (4-8 years, and 5-10  
23  
24 years respectively), however, did not suggest a different relationship from the whole cohort  
25  
26 (Appendix 3).  
27  
28  
29  
30  
31  
32  
33

### 34 **Agreements and disagreements with other research**

35  
36  
37 Previous research has shown that an improvement in body composition and cardiometabolic  
38  
39 risk can be achieved with a BMI-SDS reduction of greater than or equal to 0.25 in obese  
40  
41 adolescents, with greater benefits achieved when losing at least 0.5 BMI-SDS<sup>39</sup>.  
42  
43  
44

45 In clinical practice, the degree of weight loss with lifestyle intervention is moderate and the  
46  
47 success rate 2 years after onset of an intervention is low (<20% with a decrease in BMI-SDS  
48  
49 <0.25)<sup>81</sup>. There have been numerous reports of lifestyle-based weight management  
50  
51 interventions for obese children, many documenting changes in BMI-SDS/z-score but a recent  
52  
53 meta-analysis has documented that whilst such changes may be statistically significant, they  
54  
55 are unlikely to lead to clinical improvements in metabolic health<sup>82, 83</sup>. To our knowledge this is  
56  
57  
58  
59  
60

1  
2  
3 the first paper to establish the minimum change in BMI-SDS/z-score required to be certain of  
4  
5 improving adiposity as percentage body fat for obese children and adolescents in clinical trials.  
6  
7  
8  
9

### 10 11 **Clinical implications** 12

13  
14 If reducing fat mass is the aim of weight management interventions, our analysis in this review  
15 demonstrates that BMI-SDS/z-score changes must be of an order seldom achieved in trials  
16 worldwide. From our model, to be confident about ensuring an improvement in mean body fat,  
17 one should aim to reduce mean BMI-SDS/z-score by at least 0.6. Figure 3 and Sensitivity  
18 Analysis 5ii (Figure 5) suggest that to reduce body fat by 5% requires a much larger BMI-SDS  
19 reduction, of the order of 1.3 to 1.5, although there was a paucity of data in this region.  
20  
21  
22  
23  
24  
25  
26  
27  
28  
29  
30  
31

### 32 **Recommendations for future research** 33

34  
35 Whilst we are undertaking further analyses looking at key cardiovascular and metabolic  
36 outcomes in childhood obesity that may demonstrate improvements at lesser levels of BMI-  
37 SDS/z-score reduction, the evidence suggests that very few childhood weight management  
38 trials to date are likely to have improved percentage body fat and calls in to question their  
39 overall efficacy in terms of health improvement. That said, any trial demonstrating an  
40 improvement of the magnitude of 0.6 BMI-SDS might be termed successful with a likely  
41 reduction in fat mass.  
42  
43  
44  
45  
46  
47  
48  
49  
50  
51  
52  
53

### 54 **Conclusions** 55

56  
57 Using our model, to predict any fat mass improvement when reporting a weight management  
58 trial outcome requires a BMI-SDS/z-score decrease of 0.6. When evaluating key outcomes for  
59  
60

1  
2  
3 future weight management trials and services, this figure needs to be borne in mind by  
4  
5 researchers, health care professionals and commissioners when assessing apparent success.  
6  
7 However, given the evidence that BMI-SDS/z-scores may not accurately reflect adiposity at  
8  
9 extremes of obesity it seems prudent for future trials to report additional indices of derived  
10  
11 BMI values which may better reflect changes in actual adiposity.  
12  
13  
14  
15  
16

### 17 **Author Contributions**

18  
19 Ms Birch and Dr Perry provided substantial contributions to the conception and design of the  
20  
21 study, designed the data extraction instrument, performed electronic database searches, data  
22  
23 screening, extraction and quality assessment, coordinated and supervised data collection and  
24  
25 drafted and revised the manuscript.  
26  
27

28  
29 Professor Hamilton-Shield provided a substantial contribution to the conception and design of  
30  
31 the study, conducted data screening and interpretation, and assisted with drafting and revision  
32  
33 of the manuscript.  
34

35  
36 Dr Hunt provided statistical expertise in relation to study design and conducted the data  
37  
38 analyses and contributed to the drafting and revision of the manuscript.  
39

40  
41 Mr Matson, Ms Chong and Ms Beynon were involved in data acquisition and management.

42  
43 All authors approved the final manuscript as submitted and agree to be accountable for all  
44  
45 aspects of the work.  
46  
47  
48  
49  
50  
51  
52  
53  
54  
55  
56  
57  
58  
59  
60

## References

1. Organization, WHO, Report of the commission on ending childhood obesity. 2016: World Health Organization.
2. Poskitt E. Defining childhood obesity: the relative body mass index (BMI). *Acta Paediatrica*. 1995;84(8):961-963.
3. Cole TJ, Green PJ. Smoothing reference centile curves: the LMS method and penalized likelihood. *Statistics in Medicine*. 1992;11(10):1305-1319.
4. Simmonds M, Llewellyn A, Owen CG, Woolacott N. Predicting adult obesity from childhood obesity: a systematic review and meta-analysis. *Obesity Reviews*. 2016;17(2): 95-107.
5. Hannon TS, Rao G, Arslanian SA. Childhood Obesity and Type 2 Diabetes Mellitus. *Pediatrics*. 2005;116(2):473-480.
6. Haines L, Wan KC, Lynn R, Barrett TG, Shield JP. Rising Incidence of Type 2 Diabetes in Children in the U.K. *Diabetes Care*. 2007;30(5):1097-1101.
7. Urbina EM, Kimball TR, McCoy CE, et al. Youth with Obesity and Obesity-Related Type 2 Diabetes Mellitus Demonstrate Abnormalities in Carotid Structure and Function. *Circulation*. 2009;119(22):2913-2919.
8. Pires A, Martins P, Pereira AP, et al. Insulin Resistance, Dyslipidemia and Cardiovascular Changes in a Group of Obese Children. *Arquivos Brasileiros de Cardiologia*., 2015;104:266-273.
9. Cook S, Kavey REW. Dyslipidemia and Pediatric Obesity. *Pediatric Clinics of North America* 2011;58(6):1363-1373.
10. Chiarelli F, Marcovecchio ML. Insulin resistance and obesity in childhood. *European Journal of Endocrinology*. 2008;159(suppl 1): S67-S74.
11. Tounian P, Aggoun Y, Dubern B, et al. Presence of increased stiffness of the common carotid artery and endothelial dysfunction in severely obese children: a prospective study. *The Lancet*. 2001;358(9291): 1400-1404.
12. Klein S, Burke LE, Bray GA, et al. Clinical Implications of Obesity with Specific Focus on Cardiovascular Disease. A Statement for Professionals from the American Heart Association Council on Nutrition, Physical Activity, and Metabolism: Endorsed by the American College of Cardiology Foundation. *Circulation*. 2004;110(18):2952-2967.
13. Krebs JD, Evans S, Cooney L, et al. Changes in risk factors for cardiovascular disease with body fat loss in obese women. *Diabetes, Obesity and Metabolism*. 2002;4(6):379-387.
14. Goldstein DJ. Beneficial health effects of modest weight loss. *International journal of obesity and related metabolic disorders*. 1992;16(6):397-415.

15. Colditz GA, Willett WC, Rotnitzky A, Manson JE. Weight gain as a risk factor for clinical diabetes mellitus in women. *Annals of Internal Medicine*. 1995;122(7):481-486.
16. National Heart, Lung, and Blood Institute. "Clinical guidelines on the identification, evaluation, and treatment of overweight and obesity in adults. Bethesda (MD): National Heart, Lung, and Blood Institute (1998).
17. Cole TJ. The LMS method for constructing normalized growth standards. *European Journal of Clinical Nutrition*. 1990; 44:45–60.
18. Ho M, Garnett SP, Baur L, et al. Effectiveness of Lifestyle Interventions in Child Obesity: Systematic Review with a Meta-analysis. *Pediatrics*. 2012;130(6): e1647-1671.
19. Colquitt JL, Loveman E, O'Malley C, et al. Diet, physical activity, and behavioural interventions for the treatment of overweight or obesity in preschool children up to the age of 6 years. *Cochrane Database Syst Rev*, 2016. **3**: p. Cd012105.
20. Oude Luttikhuis H, Baur L, Jansen H, et al., Cochrane review: Interventions for treating obesity in children. *Evidence-based child health: A Cochrane Review Journal*. 2009;4(4):1571-1729.
21. National Institute for Health and Care Excellence. Quality Standard [QS94]. Obesity in children and young people: prevention and lifestyle weight management programmes. *NICE*. 2015; <https://www.nice.org.uk/guidance/qs94>.
22. Friedemann C, Mahtani K, Thompson M, Perera R. Cardiovascular disease risk in healthy children and its association with body mass index: systematic review and meta-analysis. *British Medical Journal*. 2012; 345: e4759.
23. Prentice AM, Jebb SA. Beyond body mass index. *Obesity Review*. 2001; 2(3):141-7.
24. Cole TJ, Freeman JV, Preece MA. Body mass index reference curves for the UK, 1990. *Archives of Disease in Childhood*. 1995;73(1):25-29.
25. Kuczmarski RJ, Ogden CL, Grummer-Strawn LM, et al. CDC growth charts: United States. *Advance Data*, 2000;(314):1-27.
26. Cole TJ, Bellizzi MC, Flegal KM, Dietz WH. Establishing a standard definition for child overweight and obesity worldwide: international survey. *British Medical Journal*. 2000; 320(7244):1240.
27. De Onis M, Garza C, Onyango AW, Borghi E. Comparison of the WHO child growth standards and the CDC 2000 growth charts. *The Journal of Nutrition*. 2007;137(1):144-148.



- 1
  - 2
  - 3
  - 4
  - 5
  - 6
  - 7
  - 8
  - 9
  - 10
  - 11
  - 12
  - 13
  - 14
  - 15
  - 16
  - 17
  - 18
  - 19
  - 20
  - 21
  - 22
  - 23
  - 24
  - 25
  - 26
  - 27
  - 28
  - 29
  - 30
  - 31
  - 32
  - 33
  - 34
  - 35
  - 36
  - 37
  - 38
  - 39
  - 40
  - 41
  - 42
  - 43
  - 44
  - 45
  - 46
  - 47
  - 48
  - 49
  - 50
  - 51
  - 52
  - 53
  - 54
  - 55
  - 56
  - 57
  - 58
  - 59
  - 60
28. De Onis MD, Onyango AW, Borghi E, Siyam A, Nishida C, Siekmann J. Development of a WHO growth reference for school-aged children and adolescents. *Bulletin of the World Health Organization*. 2007b; 85(9):660-667.
29. Higgins J, Green S. *Cochrane handbook for systematic reviews of interventions*. Chichester: Wiley; 2011.
30. Avenell A, Broom J, Brown TJ. Systematic review of the long-term effects and economic consequences of treatments for obesity and implications for health improvement. *Health Technol. Assess.* 2004; 8(21):iii-iv:1-182.
31. Harbord RM, Higgins JPT. 'Meta-regression in Stata.' *The Stata Journal*. 2008;8(4):493-519.
32. Bell L, Watts K, Siafarikas A, et al. Exercise alone reduces insulin resistance in obese children independently of changes in body composition. *Journal of Clinical Endocrinol. Metab.* 2007; 92(11):4230-4235.
33. Bock DE, Watts K, Siafarikas A, et al. The Health Initiative Program for Kids (HIP Kids): effects of a 1-year multidisciplinary lifestyle intervention on adiposity and quality of life in obese children and adolescents - a longitudinal pilot intervention study. *BMC Pediatrics*. 2014; 14:296. doi: 10.1186/s12887-014-0296-1
34. Bruyndonckx L, Hoymans VY, De Guchtenaere A, et al. Diet, exercise, and endothelial function in obese adolescents. *Pediatrics*. 2015;135(3): e653-e661.
35. Bustos P, Orias J, Sáez K, Maldonado M, Cuadra L, Asenjo S. Effects of the Bright Bodies Program in Chilean obese children. *Revista Medica De Chile*. 2015;143(9):1136-1143.
36. Calcaterra V, Larizza D, Codrons E, et al. Improved metabolic and cardiorespiratory fitness during a recreational training program in obese children. *Journal of Pediatric Endocrinology*. 2013; 26(3-4):271-276.
37. Dobe M, Geisler A, Hoffmann D, et al. [The Obeldicks concept. An example for a successful outpatient lifestyle intervention for overweight or obese children and adolescents]. *Bundesgesundheitsblatt, Gesundheitsforschung, Gesundheitsschutz*. 2011; 54(5):628-635.
38. Farpour-Lambert NJ, Aggoun Y, Marchand LM, Martin XE, Herrmann FR, Beghetti M. Physical activity reduces systemic blood pressure and improves early markers of atherosclerosis in pre-pubertal obese children. *Journal of the American College of Cardiology*. 2009; 54: 2396-406 DOI: 10.1016/j.jacc.2009.08.030.
39. Ford AL, Hunt LP, Cooper A, Shield JP. What reduction in BMI SDS is required in obese adolescents to improve body composition and cardiometabolic health? *Archives of Disease in Childhood*. 2010a; 95:256-261. DOI: 10.1136/adc.2009.165340.

- 1
  - 2
  - 3
  - 4
  - 5
  - 6
  - 7
  - 8
  - 9
  - 10
  - 11
  - 12
  - 13
  - 14
  - 15
  - 16
  - 17
  - 18
  - 19
  - 20
  - 21
  - 22
  - 23
  - 24
  - 25
  - 26
  - 27
  - 28
  - 29
  - 30
  - 31
  - 32
  - 33
  - 34
  - 35
  - 36
  - 37
  - 38
  - 39
  - 40
  - 41
  - 42
  - 43
  - 44
  - 45
  - 46
  - 47
  - 48
  - 49
  - 50
  - 51
  - 52
  - 53
  - 54
  - 55
  - 56
  - 57
  - 58
  - 59
  - 60
40. Ford AL, Bergh C, Sabin MA, Hollinghurst S, Hunt LP, Shield JP. Treatment of childhood obesity by retraining eating behaviour: randomised controlled trial. *British Medical Journal*, 2010b. 340: p. b5388.
41. Gajewska J, Kuryłowicz A, Mierzejewska E, et al. Complementary Effects of Genetic Variations in LEPR on Body Composition and Soluble Leptin Receptor Concentration after 3-Month Lifestyle Intervention in Prepubertal Obese Children. *Nutrients*. 2016;8(6). pii: E328. doi: 10.3390/nu8060328
42. Garanty-Bogacka B, Syrenicz M, Goral J, et al. Changes in inflammatory biomarkers after successful lifestyle intervention in obese children. *Endokrynologia Polska*. 2011;62(6):499-505.
43. Grønbæk H, Lange A, Birkebæk NH, et al. Effect of a 10-week weight loss camp on fatty liver disease and insulin sensitivity in obese Danish children. *Journal of Pediatric Gastroenterol.Nutr*. 2012 54(2) p.223-228.
44. Kazankov K, Møller HJ, Lange A, et al. The macrophage activation marker sCD163 is associated with changes in NAFLD and metabolic profile during lifestyle intervention in obese children. *Pediatric Obesity*. 2015;10(3):226-233.
45. Hvidt KN, Olsen MH, Ibsen H, Holm JC. Effect of changes in BMI and waist circumference on ambulatory blood pressure in obese children and adolescents. *Journal of Hypertension*. 2014; 32(7):1470-1477.
46. Kirk S, Zeller M, Claytor R, Santangelo M, Khoury PR, Daniels SR. The relationship of health outcomes to improvement in BMI in children and adolescents. *Obesity Research*. 2005; 13(5): 876-882.
47. Klijn P, van der Baan-Slootweg O, van Stel HF. Aerobic exercise in adolescents with obesity: preliminary evaluation of a modular training program and the modified shuttle. *BMC Pediatrics*. 2007; 7(19): doi:10.1186/1471-2431-7-19
48. Lazzer S, Molin M, Stramare D, Facchini S, Francescato MP. Effects of an eight-month weight-control program on body composition and lipid oxidation rate during exercise in obese children. *Journal of Endocrinological Investigation*. 2008; 31(6): 509-514.
49. Meyer AA, Kundt G, Lenschow U, Schuff-Werner P, Kienast W. Improvement of early vascular changes and cardiovascular risk factors in obese children after a six-month exercise program. *Journal of the American College of Cardiology*. 2006; 48(9):1865-1870.
50. Miraglia F, de Moraes Silveira CR, Gomes Beghetto M, dos Santos Oliveira F, de Mello ED. Behavior of adipokines after a year follow-up in the Obesity Outpatient Clinic for Children and Adolescents. *Nutricion Hospitalaria*. 2015; 32(4):1554-1559.
51. Morell-Azanza L, García-Calzón S, Rendo-Urteaga T, et al. Serum oxidized low-density lipoprotein levels are related to cardiometabolic risk and decreased after a weight loss treatment in obese children and adolescents. *Pediatric Diabetes*. 2017; 18: 392-398.

- 1  
2  
3 52. Rendo-Urteaga T, García-Calzón S, González-Muniesa P, et al. Peripheral blood  
4 mononuclear cell gene expression profile in obese boys who followed a moderate energy-  
5 restricted diet: Differences between high and low responders at baseline and after the  
6 intervention. *British Journal of Nutrition*. 2015; 113(2): 331-342.  
7  
8  
9 53. Murer SB, Knöpfli BH, Aeberli I, et al. Baseline leptin and leptin reduction predict  
10 improvements in metabolic variables and long-term fat loss in obese children and  
11 adolescents: A prospective study of an inpatient weight-loss program. *American Journal of*  
12 *Clinical Nutrition*. 2011; 93(4): 695-702.  
13  
14 54. Aeberli I, Jung A, Murer SB, et al. During rapid weight loss in obese children, reductions  
15 in TSH predict improvements in insulin sensitivity independent of changes in body weight  
16 or fat. *The Journal of clinical endocrinology and metabolism*. 2010; 95(12):5412-8.  
17  
18 55. Murdolo G, Tortoioli C, Celi F, et al. Fetuin-A, adiposity-linked insulin resistance and  
19 responsiveness to an educational-based weight excess reduction program: a population-  
20 based survey in prepubertal schoolchildren. *Endocrine*. 2017; 56(2): 357-365.  
21  
22 56. Ning Y, Yang S, Evans RK, et al. Changes in body anthropometry and composition in  
23 obese adolescents in a lifestyle intervention program. *European Journal of Nutrition*. 2014;  
24 53(4):1093-1102.  
25  
26 57. Bean M, Mazzeo SE, Stern M, et al. Six-month dietary changes in ethnically diverse, obese  
27 adolescents participating in a multidisciplinary weight management program. *Clin Pediatr*.  
28 2011;50(5):408-416.  
29  
30 58. Pacifico L, Arca M, Anania C, Cantisani V, Di Martino M, Chiesa C. Arterial function and  
31 structure after a 1-year lifestyle intervention in children with nonalcoholic fatty liver  
32 disease. *Nutrition, metabolism, and cardiovascular diseases*. 2013; 23(10):1010-6.  
33  
34 59. Racil G, Ben Ounis O, Hammouda O, et al. Effects of high vs. moderate exercise intensity  
35 during interval training on lipids and adiponectin levels in obese young females. *European*  
36 *Journal of Applied Physiology*. 2013; 113(10):2531-40.  
37  
38 60. Racil G, Coquart JB, Elmontassar W, et al. Greater effects of high- compared with  
39 moderate-intensity interval training on cardio-metabolic variables, blood leptin  
40 concentration and ratings of perceived exertion in obese adolescent females. *Biology of*  
41 *Sport*. 2016; 33(2): 145-152.  
42  
43 61. Reinehr T, Roth C, Menke T, Andler W. Adiponectin before and after weight loss in obese  
44 children. *The Journal of Clinical Endocrinology and Metabolism*. 2004; 89(8): 3790-4.  
45  
46 62. Reinehr T, Stoffel-Wagner B, Roth CL. Retinol-binding protein 4 and its relation to insulin  
47 resistance in obese children before and after weight loss. *The Journal of Clinical*  
48 *Endocrinology and Metabolism*. 2008; 93(6):2287-93.  
49  
50 63. Reinehr T, Roth CL. Fetuin-A and its relation to metabolic syndrome and fatty liver disease  
51 in obese children before and after weight loss. *The Journal of Clinical Endocrinology and*  
52 *Metabolism*. 2008; 93(11):4479-85.  
53  
54  
55  
56  
57  
58  
59  
60

- 1  
2  
3  
4  
5  
6  
7  
8  
9  
10  
11  
12  
13  
14  
15  
16  
17  
18  
19  
20  
21  
22  
23  
24  
25  
26  
27  
28  
29  
30  
31  
32  
33  
34  
35  
36  
37  
38  
39  
40  
41  
42  
43  
44  
45  
46  
47  
48  
49  
50  
51  
52  
53  
54  
55  
56  
57  
58  
59  
60
64. Rohrer TR, Rizzo F, Cäsar JJ, Muelbredt O, et al. Changes in Hepatic Risk Factors, Metabolic Variables, Body Composition, and Physical Fitness in Obese Children After a One-Year Weight Loss Program. *Journal of Pediatric Endocrinology & Metabolism*, 2008; 21(9): 837-845.
  65. Rolland-Cachera MF, Thibault H, Souberbielle JC, et al. Massive obesity in adolescents: dietary interventions and behaviours associated with weight regain at 2 y follow-up. *International journal of obesity and related metabolic disorders*. 2004; 28(4):514-519.
  66. Roth, CL, Elfers C, Lass N, Reinehr T. Betatrophin: No relation to glucose metabolism or weight status in obese children before and after lifestyle intervention. *Pediatric Diabetes*. 2017; 18: 485-491.
  67. Savoye M, Berry D, Dziura J, et al. Anthropometric and psychosocial changes in obese adolescents enrolled in a Weight Management Program. *Journal of the American Dietetic Association*. 2005; 105(3):364-370.
  68. Savoye M, Nowicka P, Shaw M, et al. Long-term Results of an Obesity Program in an Ethnically Diverse Pediatric Population. *Pediatrics*. 2011; 127(3):402-410.
  69. Savoye M, Shaw M, Dziura J, et al. Effects of a Weight Management Program on Body Composition and Metabolic Parameters in Overweight Children. *JAMA*. 2007; 297(24):2697-2704.
  70. Savoye M, Caprio S, Dziura J, et al. Reversal of early abnormalities in glucose metabolism in obese youth: Results of an intensive lifestyle randomized controlled trial. *Diabetes Care*. 2014;37(2):317 – 324.
  71. Schiel R, Kaps A, Günter Stein G, Steveling A. Identification of Predictors for Weight Reduction in Children and Adolescents with Overweight and Obesity (IDA-Insel Survey). *Healthcare*. 2016; 4(1): 07. doi:10.3390/healthcare4010005
  72. Seabra A, Katzmarzyk P, Carvalho MJ, et al. Effects of 6-month soccer and traditional physical activity programmes on body composition, cardiometabolic risk factors, inflammatory, oxidative stress markers and cardiorespiratory fitness in obese boys. *Journal of Sports Sciences*. 2016; 34(19):1822-1829.
  73. Truby H, Baxter K, Ware RS, et al. A Randomized Controlled Trial of Two Different Macronutrient Profiles on Weight, Body Composition and Metabolic Parameters in Obese Adolescents Seeking Weight Loss. *PLoS ONE [Electronic Resource]*. 2016; 11(3): e0151787.
  74. van der Baan–Slootweg O, Benninga MA, Beelen A, van der Palen J, et al. Inpatient treatment of children and adolescents with severe obesity in the Netherlands. A Randomized Clinical Trial. *JAMA Pediatr*, 2014; 168(9):807-814.
  75. Visuthranukul C, Sirimongkol P, Prachansuwan A, Pruksananonda C, Chomtho S. Low-glycemic index diet may improve insulin sensitivity in obese children. *Pediatric Research*. 2015;78(5):567-573.

- 1  
2  
3 76. Vitola BE, Deivanayagam S, Stein RI, et al. Weight loss reduces liver fat and improves  
4 hepatic and skeletal muscle insulin sensitivity in obese adolescents. *Obesity*. 2009;  
5 17:1744-1748.  
6
- 7  
8 77. Wickham EP, Stern M, Evans RK, et al. Prevalence of the Metabolic Syndrome Among  
9 Obese Adolescents Enrolled in a Multidisciplinary Weight Management Program: Clinical  
10 Correlates and Response to Treatment. *Metabolic Syndrome and Related Disorders*. 2009;  
11 7(3):179-186.  
12
- 13  
14 78. Evans RK, Franco RL, Stern M, et al. Evaluation of a 6-month multi-disciplinary healthy  
15 weight management program targeting urban, overweight adolescents: Effects on physical  
16 fitness, physical activity, and blood lipid profiles. *International Journal of Pediatric*  
17 *Obesity*. 2009; 4(3):130-133.  
18
- 19  
20 79. Tanner JM. Growth at adolescence: with a general consideration of the effects of hereditary  
21 and environmental factors upon growth and maturation from birth to maturity. 2nd ed.  
22 Oxford, England: Blackwell Scientific, 1962.  
23
- 24  
25 80. Wan X, Wang W, Liu J, Tong T. Estimating the sample size and standard deviation from  
26 the sample size, median, range and/or interquartile range. *BMC Medical Research*  
27 *Methodology*. 2014; 14:135 doi: 10.1186/1471-2288-14-135.  
28
- 29  
30 81. Reinehr T. Lifestyle intervention in childhood obesity: changes and challenges. *Nat Rev*  
31 *Endocrinol*. 2013; 9(10):607-614.  
32
- 33  
34 82. Al-Khudairy L, Loveman E, Colquitt JL, et al. Diet, physical activity and behavioural  
35 interventions for the treatment of overweight or obese adolescents aged 12 to 17 years.  
36 *Cochrane Database Syst Rev*. 2017 Jun 22;6:CD012691. doi:  
37 10.1002/14651858.CD012691.  
38
- 39  
40 83. Mead E, Brown T, Rees K, et al. Diet, physical activity and behavioural interventions for  
41 the treatment of overweight or obese children from the age of 6 to 11 years. *Cochrane*  
42 *Database Syst Rev*. 2017 Jun 22;6:CD012651. doi: 10.1002/14651858.CD012651.  
43
- 44  
45 84. Carraway ME, Lutes LD, Crawford Y, et al.. Camp-based immersion treatment for obese,  
46 low socioeconomic status, multi-ethnic adolescents. *Childhood obesity* (Print). 2014;10(2):  
47 122-131.  
48
- 49  
50 85. Croker H, Viner RM, Nicholls D. Family-based behavioural treatment of childhood obesity  
51 in a UK National Health Service setting: randomized controlled trial. *International Journal*  
52 *of Obesity*. 2012; 36(1):16-26.  
53
- 54  
55 86. Doughty KN, Njike VY, Katz DL. Effects of a Cognitive-Behavioral Therapy-Based  
56 Immersion Obesity Treatment Program for Adolescents on Weight, Fitness, and  
57 Cardiovascular Risk Factors: A Pilot Study. *Childhood Obesity*. 2015;11(2):215-218.  
58  
59  
60



- 1  
2  
3  
4  
5  
6  
7  
8  
9  
10  
11  
12  
13  
14  
15  
16  
17  
18  
19  
20  
21  
22  
23  
24  
25  
26  
27  
28  
29  
30  
31  
32  
33  
34  
35  
36  
37  
38  
39  
40  
41  
42  
43  
44  
45  
46  
47  
48  
49  
50  
51  
52  
53  
54  
55  
56  
57  
58  
59  
60
87. Elloumi M, Ben Ounis O, Makni E, Van Praagh E, Tabka Z, Lac G. Effect of individualized weight-loss programmes on adiponectin, leptin and resistin levels in obese adolescent boys. *Acta Paediatr.* 2009; 98(9):1487-93.
  88. Grulich-Henn J, Lichtenstein S, Hörster F, Hoffmann GF, Nawroth PP, Hamann A. Moderate weight reduction in an outpatient obesity intervention program significantly reduces insulin resistance and risk factors for cardiovascular disease in severely obese adolescents. *Int J Endocrinol.* 2011;2011:541021
  89. Gunnarsdottir T, Einarsson SM, Njardvik U, et al. Family-based behavioral treatment for obese children - results and two year follow up. *Laknabladid.* 2014;100(3):139-45.
  90. Holm JC, Buckert M, Hans-Christoph Friederich H-C, et al. Time course and determinants of leptin decline during weight loss in obese boys and girls. *International Journal of Pediatric Obesity.* 2007; 2(1): 2-10.
  91. Kalavainen M, Utriainen P, Vanninen E, Korppi M, Nuutinen O. Impact of childhood obesity treatment on body composition and metabolic profile. *World Journal of Pediatrics.* 2012; 8(1):31-7.
  92. Kolsgaard ML, Joner G, Brunborg C, et al. Reduction in BMI z-score and improvement in cardiometabolic risk factors in obese children and adolescents. The Oslo Adiposity Intervention Study - a hospital/public health nurse combined treatment.[Erratum appears in *BMC Pediatr.* 2012;12:77; PMID: 22709339]. *BMC Pediatrics.* 2011; 11: 47.
  93. Kolotourou M, Radley D, Gammon C, Smith L, Chadwick P, Sacher PM. Long-Term Outcomes following the MEND 7-13 Child Weight Management Program. *Childhood Obesity.* 2015;11(3): 325-330.
  94. Marcano, H, Fernández M, Paoli M, et al. Limited Weight Loss or Simply No Weight Gain following Lifestyle-Only Intervention Tends to Redistribute Body Fat, to Decrease Lipid Concentrations, and to Improve Parameters of Insulin Sensitivity in Obese Children. *International Journal of Pediatric Endocrinology.* 2011. 2011(1): 241703.
  95. Mager DR, Iñiguez IR, Gilmour S, Yap J. The effect of a low fructose and low glycemic index/load (FRAGILE) dietary intervention on indices of liver function, cardiometabolic risk factors, and body composition in children and adolescents with non-alcoholic fatty liver disease (NAFLD). *J Parenter Enteral Nutr.* 2015;39(1):73-84.
  96. Makkes S, Renders CM, Bosmans JE, van der Baan-Slootweg OH, Hoekstra T, Seidell JC. One-year effects of two intensive inpatient treatments for severely obese children and adolescents. *BMC Pediatrics,* 2016;16:120 doi: 10.1186/s12887-016-0659-x.
  97. Martos R, Valle M, Morales RM, Cañete R, Gascón F, Urbano MM. Changes in body mass index are associated with changes in inflammatory and endothelial dysfunction biomarkers in obese prepubertal children after 9 months of body mass index SD score loss. *Metabolism-Clinical and Experimental.* 2009; 58(8):1153-1160.

- 1  
2  
3 98. Obert P, Gueugnon C, Nottin S, et al., Impact of diet and exercise training-induced weight  
4 loss on myocardial mechanics in severely obese adolescents. *Obesity*, 2013; 21(10): 2091-  
5 8.  
6
- 7  
8 99. Panagiotopoulos C, Ronsley R, Al-Dubayee M, et al., The Centre for Healthy Weights-  
9 Shapedown BC: A Family-Centered, Multidisciplinary Program that Reduces Weight Gain  
10 in Obese Children over the Short-Term. *International Journal of Environmental Research*  
11 *and Public Health*. 2011; 8(12):4662-4678.  
12
- 13  
14 100. Pozzato C, Verduci E, Scaglioni S, Liver Fat Change in Obese Children After a 1-year  
15 Nutrition-behavior Intervention. *Journal of Pediatric Gastroenterology and Nutrition*.  
16 2010;51(3), 331–335.  
17
- 18 101. Verduci E, Radaelli G, Salvioni M, Riva E, Giovannini M. Plasma long-chain fatty acids  
19 profile and metabolic outcomes in normolipidaemic obese children after one-year  
20 nutritional intervention. *Acta paediatrica*. 2011;100(4): 585-9  
21
- 22  
23 102. Reinehr T. and Andler W. Changes in the atherogenic risk factor profile according to  
24 degree of weight loss. *Archives of Disease in Childhood*. 2004;89(5):419-422.  
25
- 26  
27 103. Reinehr T, C Schmidt C, Toschke AM, Andler W. Lifestyle intervention in obese children  
28 with non-alcoholic fatty liver disease: 2-year follow-up study. *Archives of Disease in*  
29 *Childhood*. 2009; 94(6):437-442.  
30
- 31  
32 104. Rijks JM, Plat J, Mensink RP, Dorenbos E, Buurman WA, Vreugdenhil AC. Children with  
33 morbid obesity benefit equally as children with overweight and obesity from an ongoing  
34 care program. *Journal of Endocrinol Metab*. 2015; 100(9): 3572-3580.  
35
- 36  
37 105. Rovira AF, París Miró N, Zaragoza-Jordana M, et al Clinical and metabolic effectiveness  
38 of a new motivational therapy for the treatment of obesity in adolescents (OBEMAT).  
39 *Anales De Pediatria*. 2013. 78(3): 157-166.  
40
- 41  
42 106. Santomauro M, Paoli-Valeri M, Fernández M, et al., Non-alcoholic fatty liver disease and  
43 its association with clinical and biochemical variables in obese children and adolescents:  
44 Effect of a one-year intervention on lifestyle. *Endocrinología y Nutrición* (English Edition),  
45 2012;59(6): p. 346-353.  
46
- 47  
48 107. Schum J, Blumenstock G, Weber K, et al. Variants of the FTO Gene in Obese Children and  
49 their Impact on Boy Composition and Metabolism before and after Lifestyle Intervention.  
50 *Experimental and Clinical Endocrinology & Diabetes*. 2012;120(3):128-131.  
51
- 52  
53 108. Shalitin S, Ashkenazi-Hoffnung L, Yackobovitch-Gavan M, et al. Effects of a Twelve-  
54 week randomized intervention of exercise and/or diet on weight loss and weight  
55 maintenance, and other metabolic parameters in obese preadolescent children. *Hormone*  
56 *Research*. 2009;72(5):287-301  
57
- 58  
59 109. Springer F, Ballweg V, Schweizer R, et al. Changes in whole-body fat distribution,  
60 intrahepatic lipids, and insulin resistance of obese adolescents during a low-level lifestyle  
intervention. *European Journal of Pediatrics*, 2015;174(12):1603-12.

- 1  
2  
3 110. Tan-Ting AM, Llido L. Outcome of a hospital based multidisciplinary weight loss program  
4 in obese Filipino children. *Nutrition*. 2011; 27:50-54.  
5  
6  
7 111. Valle Jimenez M, Martos R, Morales RM, et al. Relationship between changes in plasma  
8 leptin concentrations and plasminogen activator inhibitor-1 in obese prepubertal children  
9 after nine months of treatment. *Annals of nutrition & metabolism*. 2013; 63(3): 216-22.  
10  
11 112. Vanhelst J, Fardy PS, Béghin L, Bui-Xuan G, Mikulovic J. Strategies in intervention  
12 programmes for obese youth: implication of the age and the type of physical activities.  
13 *Clinical Physiology and Functional Imaging*. 2015; 35(1): 17-20.  
14  
15 113. Vasquez F, Diaz E, Lera L, Vasquez L, Anziani A, Burrows R. Impact of a strength training  
16 exercise program on body composition and cardiovascular risk factors in a group of obese  
17 schoolchildren by pubertal stage. *American Journal of Sports Science and Medicine*. 2014;  
18 2(1): 40-47.  
19  
20 114. Verduci E, Lassandro C, Giaccherio R, Miniello VL, Banderali G, Radaelli G. Change in  
21 metabolic profile after 1-year nutritional-behavioral intervention in obese children.  
22 *Nutrients*. 2015; 7(12): 10089-10099.  
23  
24 115. Vos RC, Wit JM, Pijl H, Houdijk EC. Long-term effect of lifestyle intervention on  
25 adiposity, metabolic parameters, inflammation and physical fitness in obese children: a  
26 randomized controlled trial. *Nutrition & Diabetes*. 2011; 1:e9. doi: 10.1038/nutd.2011.5  
27  
28  
29  
30  
31 116. Weiss R, Shaw M, Savoye M, Caprio S. Obesity dynamics and cardiovascular risk factor  
32 stability in obese adolescents. *Pediatric Diabetes*. 2009; 10(6): 360-7.  
33  
34 117. Wiegand C, Kokocinski K, Lederer P, Dötsch J, Rascher W, Knerr I. Childhood obesity:  
35 Concept, feasibility, and interim results of a local group-based, long-term treatment  
36 program. *J Nutr Educ Behav*. 2008; 40:369-373.  
37  
38  
39 118. Wong WW, Abrams SH, Mikhail C, et al. An innovative summer camp program improves  
40 weight and self-esteem in obese children. *Journal of Pediatric Gastroenterology and*  
41 *Nutrition*. 2009; 49(4):493-497.  
42  
43  
44 119. Freedman DS, Butte NF, Tavares EM, Lundeen EA, Blanck, HM, Goodman AB, Ogden  
45 CL. BMI z-scores are a poor indicator of adiposity among 2- to 19-year -olds with very  
46 high BMIs, NHANES 1999-2000 to 2013-2014. *Obesity*, 2017; 25(4): 739–746.  
47 doi:10.1002/oby.21782.  
48  
49 120. Woo JG, Cole TJ. Assessing adiposity using BMI-Z scores in children with severe obesity.  
50 *Obesity*, 2017; 25(4); 662  
51  
52  
53  
54  
55  
56  
57  
58  
59  
60



**Figure 1: Flow diagram from the systematic review that identified the included studies**

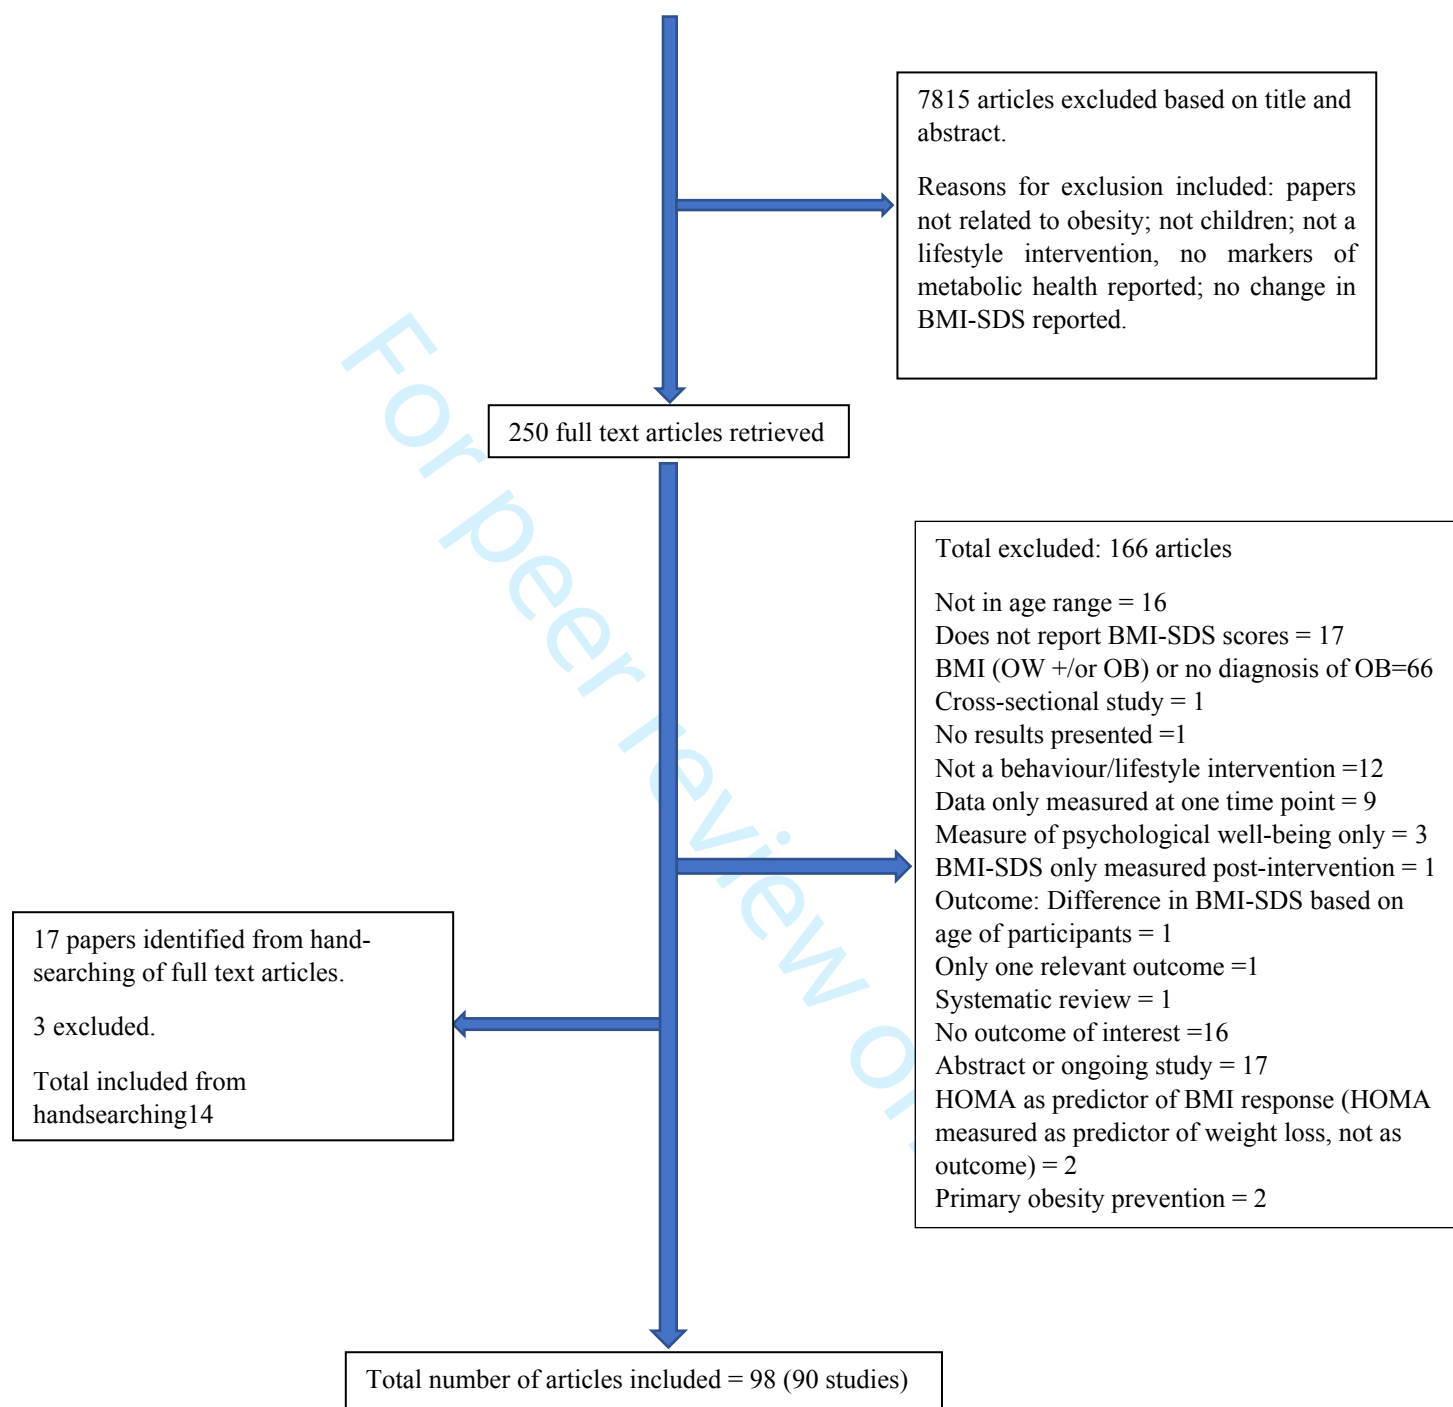

1  
2  
3  
4  
5 **Figure 2: Venn diagram illustrating the markers of metabolic health measured**  
6  
7

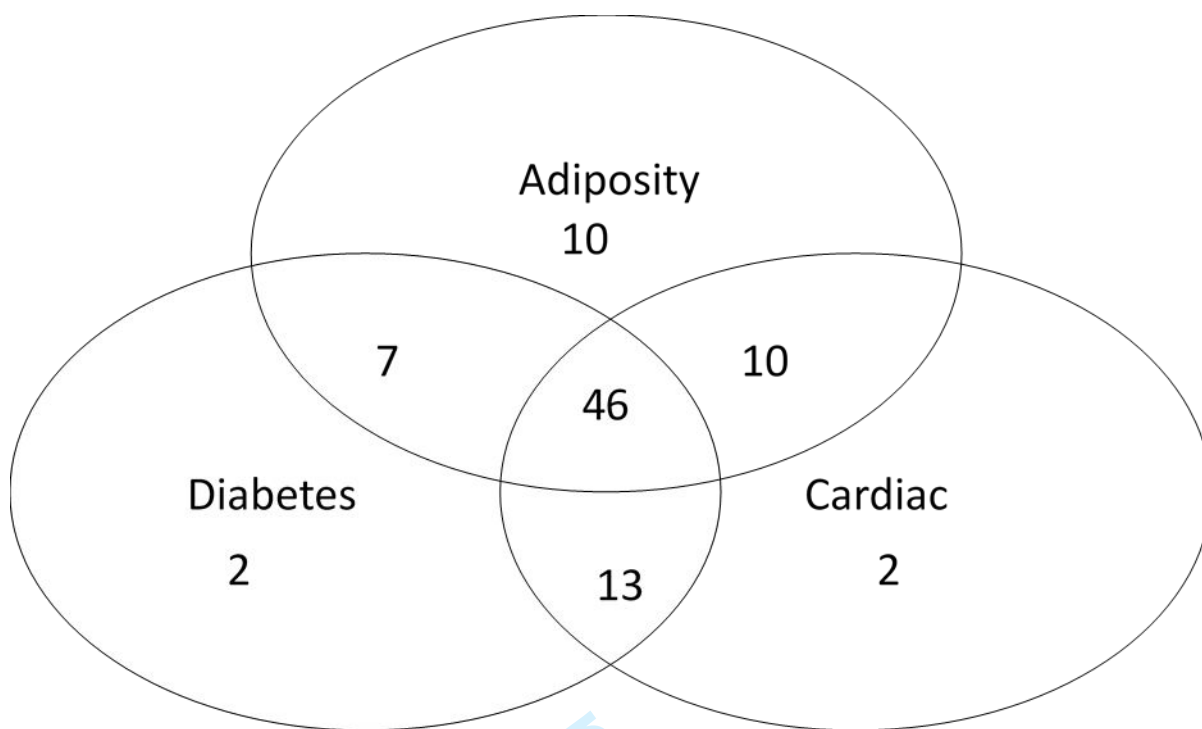

**TOTAL NUMBER OF STUDIES = 90**

review only

Figure. 3: Regression line showing the relationship between mean change in percentage body fat and BMI-SDS/z-score across the 39 studies (67 subsets) analysed

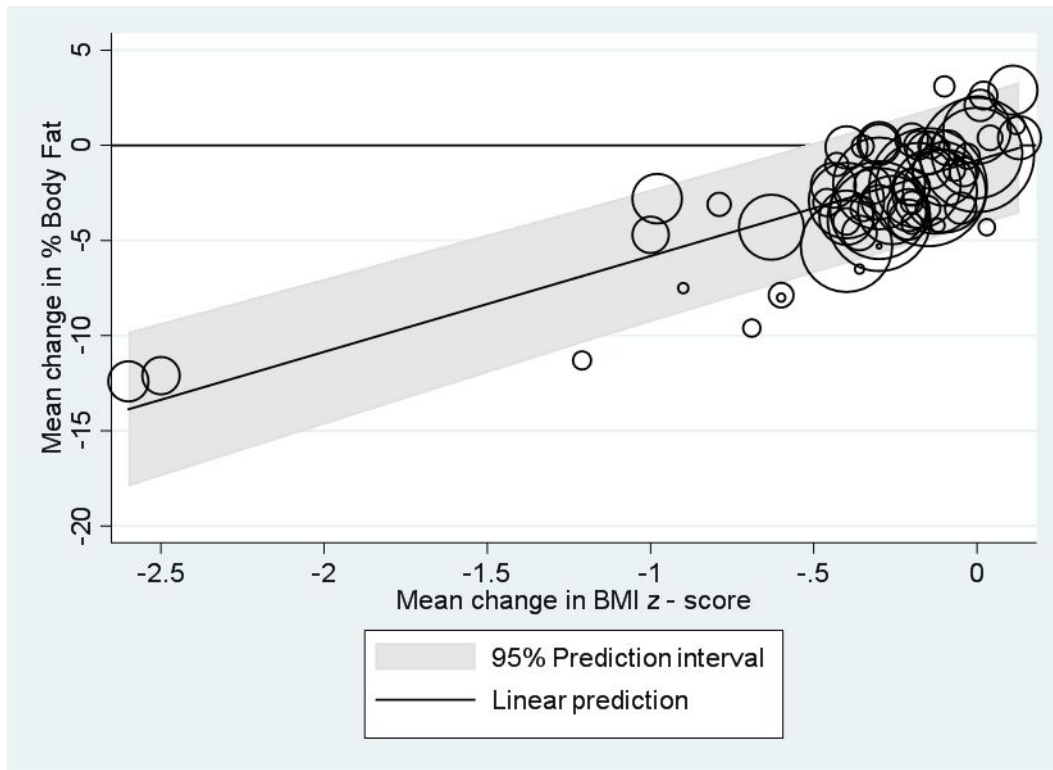

Review only

Figure 4: Normal plot to show the standardised predicted random effects from the meta-regression

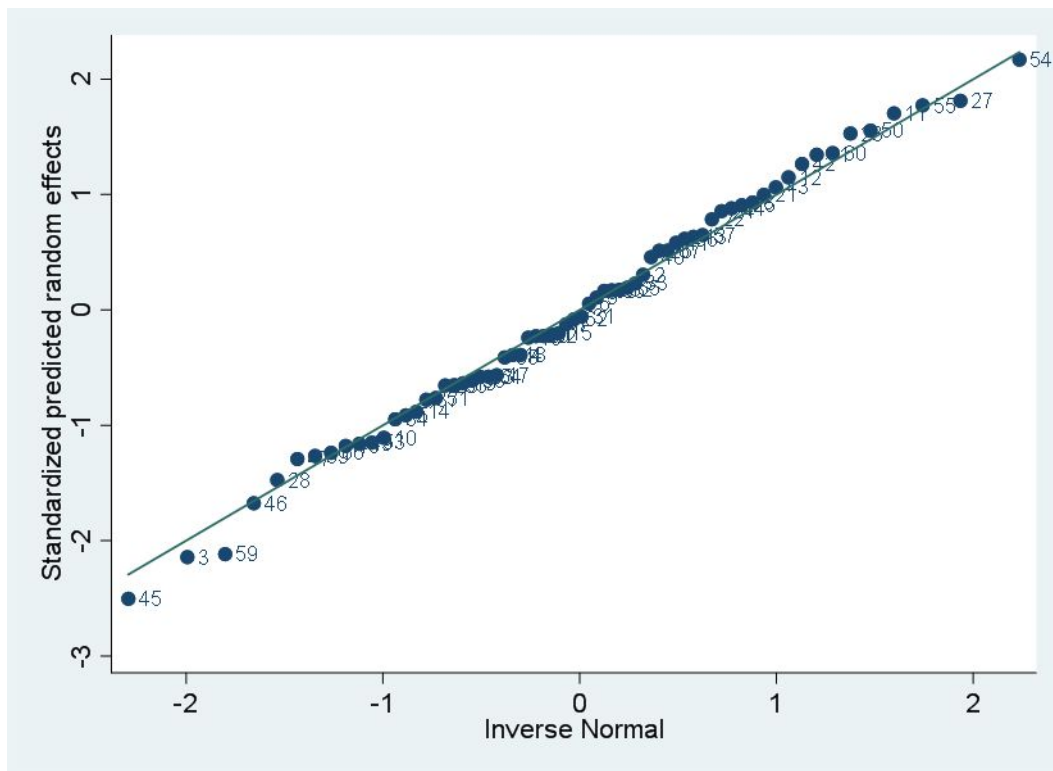

### Figure 5: Sensitivity analyses

Figure 5(i): Analyses based on the 23 data sets where the SEs of the mean changes in %Body Fat were known (Fitted regression line: Mean change in %Body Fat =  $4.482 \times$  Mean change in BMI z-score -  $0.856$ .)

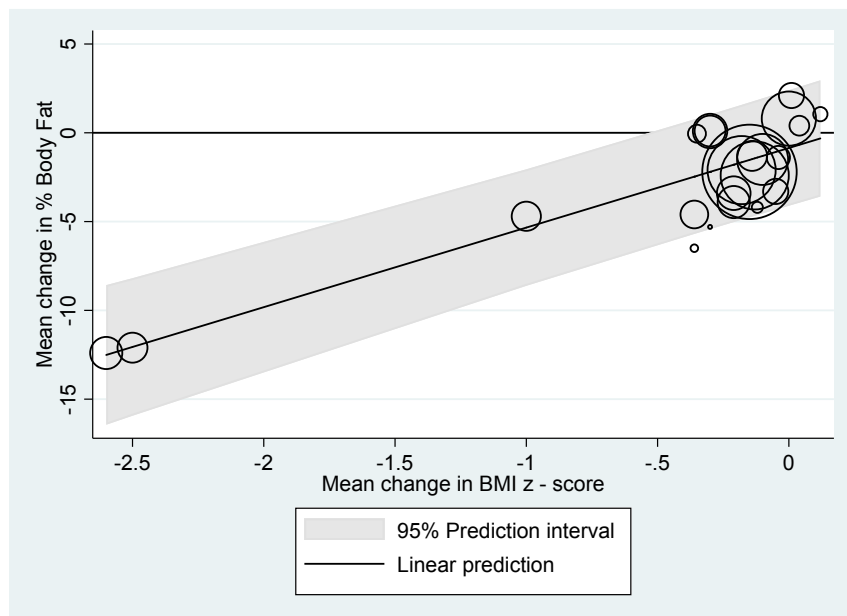

Figure 5(ii) Analysis using all the data subsets but excluding two extreme values (reduction of mean BMI z-score of more than 1.5) leaving 65 subsets. (Fitted regression line: Mean change in %Body Fat  $7.082 \times$  Mean change in BMI z-score -  $0.334$ )

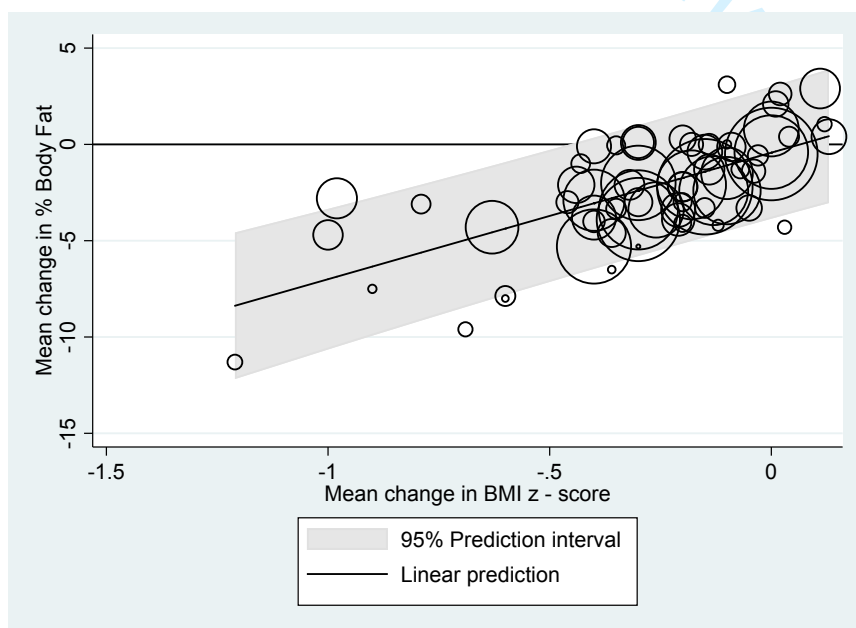

1  
2  
3 *Figure 5(iii) Analysis using all the data subsets but using a correlation coefficient of 0.50,*  
4 *rather than 0.81 to estimate the SE of the mean change in %Body Fat. (Fitted regression line*  
5 *was Mean change in %Body Fat = 5.033x Mean change in BMI z-score - 0.800)*  
6  
7

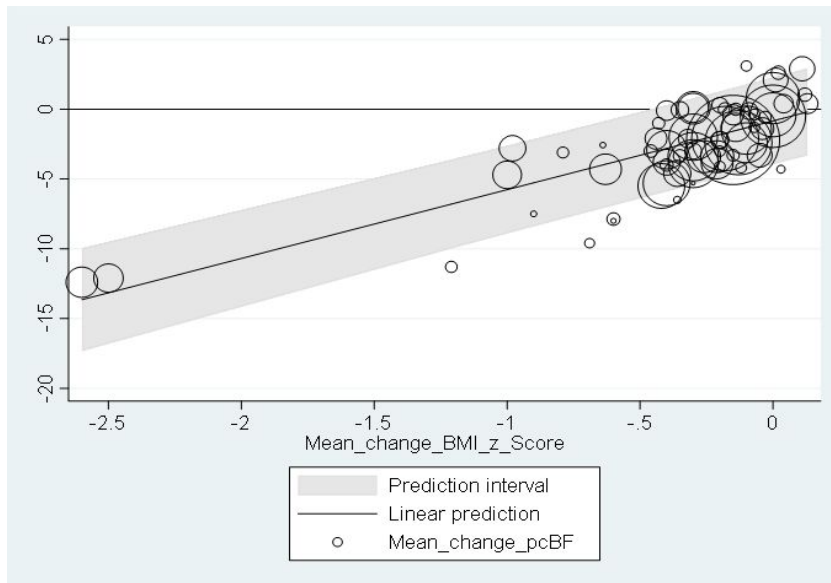

## APPENDIX 1: Childhood obesity BMI systematic review\_MEDLINE

1. exp Child/
2. exp Adolescent/
3. juvenile.tw.
4. exp Infant/
5. exp Pediatrics/
6. child\$.tw.
7. infant\$.tw.
8. teen\$.tw.
9. p?ediatric\$.tw.
10. young person.tw.
11. schoolchild\$.tw.
12. youth.tw.
13. (boy\$ or girl\$).tw.
14. 1 or 2 or 3 or 4 or 5 or 6 or 7 or 8 or 9 or 10 or 11 or 12 or 13
15. exp body weight/
16. exp energy metabolism/
17. exp obesity/
18. exp childhood obesity/
19. exp metabolic syndrome X/
20. exp metabolic disorder/
21. (metabol\$ adj1 disorder\$).ti,ab.
22. (metabol\$ adj1 syndrome\$).ti,ab.
23. (cardiometabolic or cardio-metabolic or cardio metabolic).ti,ab.
24. (weight adj3 (cyc\$ or reduc\$ or los\$ or maint\$ or decreas\$ or watch\$ or control\$ or gain\$ or chang\$)).tw.
25. (body fat or body fat percent\$ or percent\$ body fat or fat mass or adipos\$).ti,ab.
26. waist-hip ratio\$.tw.
27. waist circumferenc\$.ti,ab.
28. (lean adj1 body adj1 mass).ti,ab.
29. (percentage adj1 body adj1 fat).ti,ab.
30. fat.ti,ab.

- 1  
2  
3 31. obes\$.ti,ab.  
4  
5 32. (overweight or over weight or over-weight).ti,ab.  
6  
7 33. exp abdominal fat/  
8  
9 34. adipose tissue/  
10  
11 35. ((food or energy or calor\$) adj1 intake).ti,ab.  
12  
13 36. (BMI or body mass ind\$ or body-mass-ind\$ or weight for height or weight-for-height).ti,ab.  
14  
15 37. (overfeed\$ or over feed\$).tw.  
16  
17 38. (overeate\$ or over eat\$).tw.  
18  
19 39. exp weight gain/  
20  
21 40. exp weight reduction/  
22  
23 41. (weight adj1 los\$).ti,ab.  
24  
25 42. (fat adj1 los\$).ti,ab.  
26  
27 43. 15 or 16 or 17 or 18 or 19 or 20 or 21 or 22 or 23 or 24 or 25 or 26 or 27 or 28 or 29 or 30 or 31 or  
28 32 or 33 or 34 or 35 or 36 or 37 or 38 or 39 or 40 or 41 or 42  
29  
30 44. (BMI adj5 z score).af.  
31  
32 45. (BMI adj5 SDS).af.  
33  
34 46. (BMI adj5 standard adj1 deviation).af.  
35  
36 47. (Body adj1 mass adj1 index adj5 sd adj1 score).af.  
37  
38 48. (Body adj1 mass adj1 index adj5 SD).af.  
39  
40 49. 44 or 45 or 46 or 47 or 48  
41  
42 50. 14 and 43 and 49  
43  
44  
45  
46  
47  
48  
49  
50  
51  
52  
53  
54  
55  
56  
57  
58  
59  
60



## Appendix 2: Characteristic of studies excluded from meta-regression

|     | Author, Year, Country (Intervention name)          | Study design: Sample size (n) Analysed (An)                                                                        | Obesity definition                                                                 | Diet D)/ Exercise (E)/D+E: Setting | Format & content                                                                                                                                                                                                                                                                                                                                        | Adiposity outcome measurement or reasons for exclusion for meta-regression |
|-----|----------------------------------------------------|--------------------------------------------------------------------------------------------------------------------|------------------------------------------------------------------------------------|------------------------------------|---------------------------------------------------------------------------------------------------------------------------------------------------------------------------------------------------------------------------------------------------------------------------------------------------------------------------------------------------------|----------------------------------------------------------------------------|
| 1.  | Carraway 2014 <sup>84</sup><br>USA                 | Cohort<br>Total = 52 (subgroup n =33 & families offered FU for 10 months)                                          | BMI > 95th %ile                                                                    | Community                          | 6 x 1 hr nutrition sessions + ad-lib access to a nutritious diet + 7hr/day PA + GT + CBT.                                                                                                                                                                                                                                                               | WC only                                                                    |
| 2.  | Croker 2012 <sup>85</sup><br>UK                    | RCT:<br>Total = 72 (63)<br>FBBT= 37 (33)<br>OC =35 (30)                                                            | OW or Ob as per IOTF<br>Mean BMI SDS>3                                             | D+E<br>Clinic (Hospital)           | Reduce snacking ≤ 2 occasions/day + Balanced diet following 'Eatwell plate and 'Traffic Light system' + Reduce sedentary behaviour + 60 min/day exercise.                                                                                                                                                                                               | body mass, fat mass, WC & WC-SDS                                           |
| 3.  | Doughty 2015 <sup>86</sup><br>USA                  | Cohort<br>Total = 12                                                                                               | BMI ≥ 89th %ile.<br>Requested data from study authors regarding OB/OW—no response. | D+E<br>Academic Institution        | Behavioural counselling + Daily caloric targets + 2 x 1hr/5 days and one 1hr/day physical training) + behavioural counselling.                                                                                                                                                                                                                          | WC. body mass                                                              |
| 4.  | Elloumi 2009 <sup>87</sup><br>Tunisia              | RCT<br>Total =21<br>Energy restriction =7<br>Exercise training =7<br>Both =7                                       | BMI > 97th %ile<br>(French standards)                                              | D+E<br>Academic Institution        | 2-month intervention. 3 groups, R = energy restricted group. E=individualised exercise group. RE= energy restriction + exercise. Individualized dietary advice by dietitian. 500kcal/day deficit (15% protein, 55% CHO, 30% fat). Exercise: 90 mins per day; 4 days per week. Intensity of exercise at heart rate corresponding to lipox <sub>max</sub> | Body mass, fat mass                                                        |
| 5.  | Grulich-Henn, 2011 <sup>88</sup><br>Germany        | Cohort Total = 58                                                                                                  | BMI > 97th %ile<br>(German paed. standards)                                        | D + E<br>Academic Institution      | 6 x monthly nutritional consultation & CBT + 24 weekly PA programs.                                                                                                                                                                                                                                                                                     | Body mass only                                                             |
| 6.  | Gunnarsdottir, 2014 <sup>89</sup><br>Iceland       | Cohort Total = 84                                                                                                  | BMI z-score > 2.0 SDS<br>(Swedish growth curve)                                    | D+E<br>Clinic (Hospital)           | Family-based Epstein behavioural intervention.                                                                                                                                                                                                                                                                                                          | Body mass only                                                             |
| 7.  | Holm 2007 <sup>90</sup><br>Denmark                 | Cohort<br>Total enrolled =120; BL =110,<br>post-intervention = 87                                                  | BMI-SDS LMS method<br>(Danish ref pop.)                                            | D+E<br>Academic Institution        | Restricted low-fat diet (6500-7000 kJ/day) + Mandatory and optional PA.                                                                                                                                                                                                                                                                                 | number of pps not consistent for BMI-SDS and % body fat                    |
| 8.  | Kalavainen, 2012 <sup>91</sup><br>Finland          | RCT<br>Total = 70<br>routine treatment = 35,<br>group treatment = 35                                               | Wt-for-ht 115-182%                                                                 | D+E<br>Community                   | 2 interventions (Group and routine) - Routine (2 school health care sessions) + Group (10 x 90 min/wk parents and children separate focusing on healthy lifestyle/physical activity session, then next 5 sessions/2 wks + 1 session together)                                                                                                           | Fat mass only                                                              |
| 9.  | Kolsgaard, 2011 <sup>92</sup><br>Norway            | Cohort<br>Total = 230 analysed (n= 307 started)                                                                    | BMI > 97.5 %ile for ht according to Norwegian percentiles.                         | D+E<br>Clinic (Hospital)           | ~1hr biannual diet & PA (60 min/day exercise encouraged) counselling session with children & parent/s.                                                                                                                                                                                                                                                  | Body mass, WC                                                              |
| 10. | Kolotourou 2013 <sup>93</sup><br>UK<br><b>MEND</b> | Cohort: Recruited from MEND<br>RCT.<br>Total = 230 analysed<br>Subsample 1 = 71 (6 mth RCT completers – both arms) | BMI ≥ 98 <sup>th</sup> %ile                                                        | D+E:<br>Community                  | Family-based 9-week MEND program (2 x wk group sessions including nutrition education, behaviour modification + fun-based PA) + 12 wk free family swim pass.                                                                                                                                                                                            | WC only                                                                    |

|     |                                                                                                                      |                                                                                                                      |                                                                                        |                              |                                                                                                                                                                                                                                                                                                                                                                                                                                                                           |                     |
|-----|----------------------------------------------------------------------------------------------------------------------|----------------------------------------------------------------------------------------------------------------------|----------------------------------------------------------------------------------------|------------------------------|---------------------------------------------------------------------------------------------------------------------------------------------------------------------------------------------------------------------------------------------------------------------------------------------------------------------------------------------------------------------------------------------------------------------------------------------------------------------------|---------------------|
|     |                                                                                                                      | Subsample 2 = 42 (12 mth RCT completers – IG only)                                                                   |                                                                                        |                              |                                                                                                                                                                                                                                                                                                                                                                                                                                                                           |                     |
| 11. | Marcano, 2011 <sup>94</sup><br>Venezuela                                                                             | Cohort<br>Total = 111                                                                                                | OW: BMI >90th %ile/BMI z-score > 1.5.<br>OB: BMI >97th %ile/BMI z-score >2             | D+E:<br>Clinic (Hospital)    | Nutrition+PA recommendations + A form to register wkly hours of PA, number of steps taken/day, and hrs/wk spent in sedentary activities + Restrict calorie intake and focus on a balanced diet encouraged.                                                                                                                                                                                                                                                                | Body fat only       |
| 12. | Mager 2015 <sup>95</sup>                                                                                             | Cohort<br>Total=12 (completed =9)                                                                                    | CDC criteria                                                                           | D Clinic (but unclear)       | 1 session of education for parents and children and then follow up at 3 months and 6 months afterwards.                                                                                                                                                                                                                                                                                                                                                                   | WC only             |
| 13. | Makkes 2016 <sup>96</sup><br>Netherlands                                                                             | RCT:<br>Total = 80<br>Short-stay (SS)=40<br>Long-stay (LS)=40                                                        | BMI-SDS ≥3.0 or BMI-SDS ≥2.3 + OB-related comorbidity                                  | D+E:<br>Clinic (Hospital)    | Intensive 12-month lifestyle treatment. In-patient period of either 2 months (short-stay group) or 6 months (long-stay group). Short-stay group: biweekly 2-day return visits for 4 months, then monthly 2-day return visits for 6 months following in-pt period. Long-stay group: monthly 2-day return visits for 6 months following in-pt period.<br>Treatment: Nutrition, physical activity and behaviour change. Required active participation of parents/caregivers. | WC,WC-SDS           |
| 14. | Martos, 2009 <sup>97</sup><br>Spain<br>(Same intervention as Valle Jimenez 2013 <sup>112</sup> but different sample) | Cohort<br>Total = 47                                                                                                 | BMI > 95th %ile on growth curves                                                       | D+E<br>Community             | Moderately OB subjects (Low-calorie diet); Severe/refractory OB subjects (Restriction diet of 25-30%) + Moderate/intense exercise 60 min/day x 5 days/wk encouraged.                                                                                                                                                                                                                                                                                                      | Body mass only      |
| 15. | Obert 2013 <sup>98</sup><br>France                                                                                   | Cohort<br>Total = 28 (plus 20 healthy lean controls)                                                                 | BMI > 97th French %ile                                                                 | D+E:<br>Clinic (Hospital)    | Cycle ergometer (9 x 5 mins x 3 times/week: 4 min moderate + 1 min intense) + 2 times/wk moderate exercise for 1st 2 mths                                                                                                                                                                                                                                                                                                                                                 | Body mass, fat mass |
| 16. | Panagiotopoulos2011 <sup>99</sup><br>Canada                                                                          | Cohort<br>Total =119                                                                                                 | OB: BMI ≥ 95th %ile;<br>OW: BMI ≥ 85th %ile and <95th %ile with at least 1 comorbidity | D+E:<br>Clinic (Hospital)    | 10 x consecutive wkly group sessions (6-10 families): 30 min PA + nutrition session + behavioural session.                                                                                                                                                                                                                                                                                                                                                                | Body mass only      |
| 17. | Pedrosa, 2011 <sup>100</sup><br>Portugal                                                                             | RCT<br>Total = 51 (OB grouped with OW in intervention individually conventional treatment and group-based treatment) | BMI z-score > 2                                                                        | D:<br>Clinic (Hospital)      | 6 mths: Participants randomised to a hypocaloric LGI or HGI diet (matched for macronutrient composition).                                                                                                                                                                                                                                                                                                                                                                 | Body mass only      |
| 18. | Pozzato <sup>101</sup><br>Verduci 2011 <sup>102</sup><br>Italy                                                       | Cohort:<br>Total = 26                                                                                                | >30kg/m2 age and sex adjusted Cole <i>et al</i> curve                                  | D+E.<br>Community and Clinic | Normocaloric balanced diet and active lifestyle based on italian guidelines for treatment of childhood obesity                                                                                                                                                                                                                                                                                                                                                            | WC only             |
| 19. | Reinehr, 2004b <sup>103</sup><br>Germany<br>OBELDICKS                                                                | Cohort:<br>Total = 57                                                                                                | BMI ≥ 97th %ile                                                                        | D+E:<br>Clinic (Hospital)    | Obeldicks - Intensive phase 3 mnths (Parents' course 2x/mnth + Behaviour therapy 2x/mnth + Nutritional course 2x/mnth + Exercise therapy 1x/wk) + Establishing phase 3 mnths (Talk rounds for parents 1x/mnth + Psychological therapy + Exercise therapy 1x/wk) + Establishing phase 2 for 3 mnths (Psychological therapy + Exercise therapy 1x/wk) + Establishing phase 3 for 3 mnths (Exercise therapy 1x/wk).                                                          | Body fat only       |
| 20. | Reinehr, 2009 <sup>104</sup><br>Germany<br>OBELDICKS                                                                 | Cohort<br>Total = 109 (plus 43 obese controls)                                                                       | IOTF criteria: OB                                                                      | D+E:<br>Clinic (Hospital)    | Obeldicks (as above)                                                                                                                                                                                                                                                                                                                                                                                                                                                      | WC only             |

1  
2  
3  
4  
5  
6  
7  
8  
9  
10  
11  
12  
13  
14  
15  
16  
17  
18  
19  
20  
21  
22  
23  
24  
25  
26  
27  
28  
29  
30  
31  
32  
33  
34  
35  
36  
37  
38  
39  
40  
41  
42  
43  
44  
45  
46

|     |                                             |                                                                                      |                                                         |                                                |                                                                                                                                                                                                                                                                                                                                                                                                  |                                                                                                   |
|-----|---------------------------------------------|--------------------------------------------------------------------------------------|---------------------------------------------------------|------------------------------------------------|--------------------------------------------------------------------------------------------------------------------------------------------------------------------------------------------------------------------------------------------------------------------------------------------------------------------------------------------------------------------------------------------------|---------------------------------------------------------------------------------------------------|
| 21. | Rijks 2015 <sup>105</sup><br>Netherlands    | Non-randomised prospective study<br>Total = 172                                      | IOTF criteria: OW, OB,<br>MO                            | D+E:<br>Clinic (Hospital)                      | Guidance with focus on nutrition, food habits, PA, sleep, psychological and social aspects.                                                                                                                                                                                                                                                                                                      | WC-SDS only                                                                                       |
| 22. | Rovira 2013 <sup>106</sup><br>Spain         | Cohort<br>Total = 110                                                                | BMI ≥ 97th %ile                                         | D+E<br>Clinic (Hospital)                       | 12 x monthly visits in 2 phases: motivational and intervention. Focus on promoting healthy eating, encouraging PA & decreasing sedentary behaviour.                                                                                                                                                                                                                                              | Only reported as 'good responders' and 'poor responders' to intervention so removed from analysis |
| 23. | Santomauro 2011 <sup>107</sup><br>Venezuela | Cohort<br>Total = 36                                                                 | BMI > 97th %ile                                         | D+E:<br>Clinic (Hospital)                      | Dietary recommendations + 30 mins daily moderate exercise or 3 x wk moderate exercise + decrease time watching TV/video games.                                                                                                                                                                                                                                                                   | Body mass, fat mass                                                                               |
| 24. | Schum 2012 <sup>108</sup><br>Germany        | Cohort:<br>Total = 75<br>HZ=52<br>HO= 21                                             | BMI-SDS > 2                                             | E:<br>Community                                | Increase to 2 hrs/day PA + nutritional recommendations based on 'Optimised Mixed Diet for German Children and Adolescents' + close surveillance by physician.                                                                                                                                                                                                                                    | Fat mass, WC                                                                                      |
| 25. | Shalitin, 2009 <sup>109</sup>               | Cohort:<br>Total = 174 randomised<br>E =58 (52)<br>D =58 (55)<br>D+E = 58 (55)       | BMI > 95 <sup>th</sup> %ile for age & gender            | D+E:<br>Clinic (Hospital)                      | 3-month interventions: Exercise intervention (90 min moderate exercise 3 days/wk); Diet intervention 3 mths (12 x/wk nutritional group meetings with parents + Hypocaloric diet 1200 kcal/day); Diet and exercise intervention 3 mths (90 min training session days/wk + 12 x/wk nutritional group meetings with parents + Hypocaloric diet 1200 kcal/day).                                      | SEs were calculated from a mixed model and not directly comparable                                |
| 26. | Springer 2015 <sup>110</sup><br>Germany     | Cohort:<br>Total=39                                                                  | BMI > 90 <sup>th</sup> %ile                             | D+E:<br>Clinic (Hospital)                      | Encouraged to increase exercise by 1-2 hrs/day + Decrease sedentary behaviour to a total of 2 hrs/day or less + Nutrition recommendations + 6 telephone calls from/visits to the physician.                                                                                                                                                                                                      | fat mass, WC & WC-SDS                                                                             |
| 27. | Tan-Ting 2011 <sup>111</sup><br>Philippines | Cohort:<br>Total = 44                                                                | BMI ≥ 95 <sup>th</sup> %ile (CDC)                       | D+E:<br>Clinic (Hospital)                      | Multidisciplinary, individualised, behavioural modification and exercise programme (St Luke's Medical Center Obesity & Weight Management Program)<br>Dietary session (6 sessions over 3 mths) + Restricted diet (1200-1500 Kcal/day) + Physical activity (24 x 1hr sessions over 3 mths + encouraged to do ≥ 30 min of individual exercise) + Behavioural management (4 x sessions over 3 mths). | body mass, fat mass, WC & WC-SDS                                                                  |
| 28. | Valle Jimenez 2013 <sup>112</sup><br>Spain  | Cohort<br>Total = 50 (plus n=50 non-obese control)                                   | BMI >95th percentile growth curves for Spanish pop.     | D+E:<br>Academic Institution/Clinic (Hospital) | Behavioural components, physical exercise and nutritional education. Energy distribution of diet: 25% between breakfast & lunch; 30-35% at lunch; 15% afternoon snack; remainder dinner. Moderate-to-intense PA for 30 mins at least 3 days per wk. Aim that 1 month after the start of tx subjects should be engaging in 60 mins/day moderate-to-intense physical exercise.                     | Body mass only                                                                                    |
| 29. | Vanhelst 2013 <sup>113</sup><br>France      | Cohort<br>Total=37                                                                   | ND                                                      | D+E:<br>Community                              | 2hr/wk exercise sessions + 2hr/3 months health education session.                                                                                                                                                                                                                                                                                                                                | Fat mass, fat free mass                                                                           |
| 30. | Vasquez 2013 <sup>114</sup><br>Chile        | Cohort<br>X-over trial (Group 1 only)<br>Total = 60                                  | BMI ≥ 95th %ile CDC                                     | D+E:<br>Academic Institution                   | Group nutrition education sessions x 6 (5 for children; 1 for parents)<br>Psychologist support sessions x 6 (5 for children; 1 for parents)<br>PE 45 mins x3/wk (30 sessions in total)                                                                                                                                                                                                           | Body mass, WC                                                                                     |
| 31. | Verduci 2015 <sup>115</sup><br>Italy        | Cohort:<br>Total = 85                                                                | BMI Cole's curve cut-off 30 kg/m <sup>2</sup> at 18 yrs | D+E:<br>Clinic (Hospital)                      | Normocaloric balanced diet + 60 min/day moderate/vigorous exercise + 1 hr educational session with dietician at recruitment.                                                                                                                                                                                                                                                                     | WC only                                                                                           |
| 32. | Vos, 2011 <sup>116</sup><br>Netherlands     | RCT<br>Total = 81 (BL: 79 An. 69)<br>I = 41 (BL 40: An. 36)<br>OC=40 (BL 39: An. 33) | Cole <i>et al</i> criteria                              | D+E:<br>Clinic (Hospital)                      | 12 mths: During first 3 mths (7 x 2.5 hr/2 wks children group meetings + 5 x 2.5 hr/2 wks parent meetings + 1 x 2.5 hr/2 wks child/parent meeting + 2-3 refresher follow-up sessions for total of 2 yrs).<br>Also included exercise however not described except in flow diagram                                                                                                                 | WC-SDS only                                                                                       |

|     |                                                |                                          |                                                                                                                |                           |                                                                                                                                                              |                |
|-----|------------------------------------------------|------------------------------------------|----------------------------------------------------------------------------------------------------------------|---------------------------|--------------------------------------------------------------------------------------------------------------------------------------------------------------|----------------|
| 33. | Weiss 2009 <sup>117</sup><br>USA<br>Yale TEAMS | Cohort:<br>Total = 186                   | BMI > 95 <sup>th</sup> %ile<br>(CDC)                                                                           | D+E:<br>Clinic (Hospital) | Subjects followed biannually as outpatients + Received nutritional/PA guidance. Levels of adherence to these recommendations was not evaluated or documented | Body mass only |
| 34. | Weigel 2008 <sup>118</sup><br>Germany          | RCT:<br>Total = 73<br>IG = 37<br>OC = 36 | OW BMI > 90 <sup>th</sup> %ile<br>OB BMI > 97 <sup>th</sup> %ile<br>Extremely OB BMI > 99.5 <sup>th</sup> %ile | D+E:<br>Community         | Twice wkly 45-60 min sessions on exercise/dietary education/coping strategies.                                                                               | Fat mass only  |
| 35. | Wong 2009 <sup>119</sup><br>USA                | Cohort:<br>Total = 21                    | BMI ≥ 95 <sup>th</sup> %ile                                                                                    | D+E:<br>Community         | 6 x 1hr behavioural lessons + 4 x 1hr PA/ nutrition lessons + 1800 kcal/day diet.                                                                            | body mass only |

**KEY:** %ile = percentile; AmO = Outpatient Ambulatory; An. = analysed; apt. = appointment; BB =Bright Bodies; BFC = Better food choices; BL = baseline; BM = behaviour modification; BMI= body mass index; C = control; CG: control group; CBT = cognitive behavioural therapy; CDC = Centre for Disease Control; CG = control group; CHO = carbohydrate; D = diet; E = exercise; FBBT = family-based behavioural treatment; F = female; FU = follow up; GI = glycaemic index; GT = group therapy; HGI = high glycaemic index; hr = hour; HZ = heterozygous; HO = homozygous; ht = height; I = intervention; IG= intervention group; IOTF = International Obesity Task Force; Inpt. = inpatient; LGI = low glycaemic index; LMS= least-mean-squares; LS = long stay; min= minute; mth = month; MO = morbidly obese; norm. normal; n = number; NAFLD = Non-alcoholic fatty liver disease; ND = not described; NR = not reported; OB = obese; OC = obese control; OW = overweight; paed. = paediatric; PA = physical activity; PE = physical activity; PROT= protein; ppts= participants; RCT = randomised controlled trial; SD = standard deviation; SDS = standard deviation score; SE: standard error; SMP= Structured meal plan; SS= short stay; SMC= structured modified carbohydrate diet; trad. = traditional; Trad. act = traditional activity; tx = treatment; TEAMS = Tracking Endpoints in Adolescent MS; wk = week; WList OC– wait list obese control; WL = weight loss; wt = weight; X-over = crossover; yr = year

1  
2  
3 **Appendix 3: Regression line showing the relationship between mean change in percentage**  
4 **body fat and BMI-SDS/z-score across the 39 studies (67 subsets) analysed, with two studies**  
5 **of younger children highlighted**  
6  
7  
8  
9

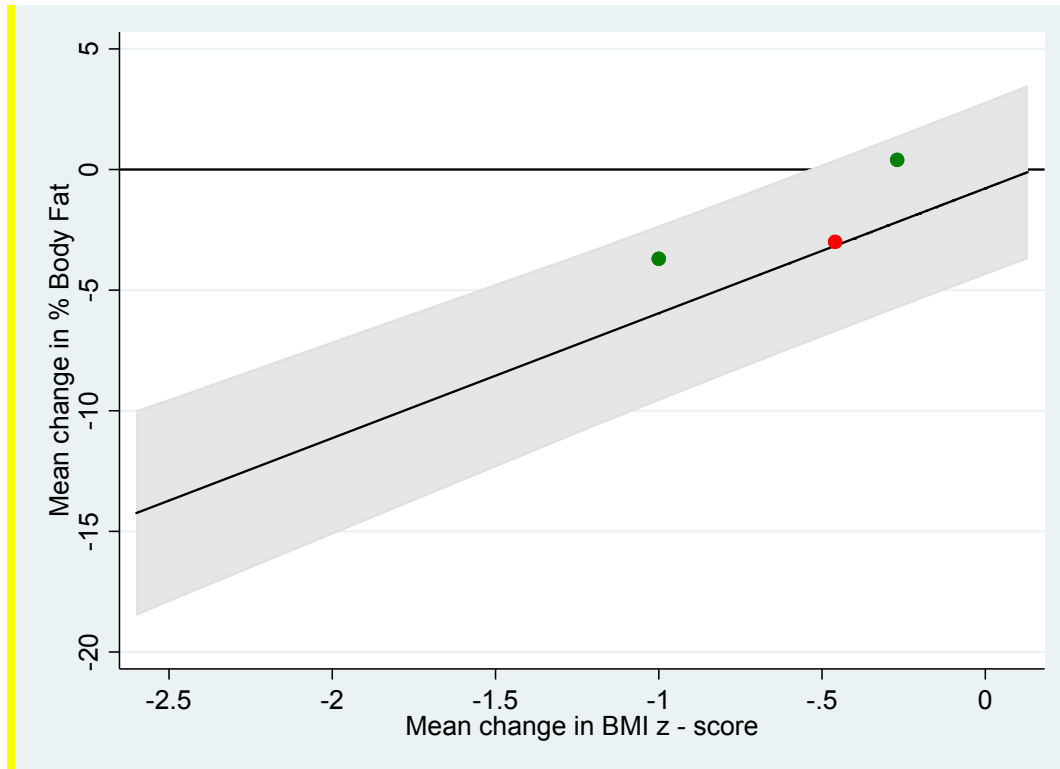

- 34  
35  
36  
37  
38  
39  
40  
41  
42  
43  
44  
45  
46  
47  
48  
49  
50  
51  
52  
53  
54  
55  
56  
57  
58  
59  
60
- participants 4-8 years. Dobe et al., 2011<sup>37</sup>
  - participants 5-10 years. Gajewska et al., 2016<sup>41</sup>

# BMJ Open

## What change in body mass index is associated with improvement in percentage body fat in childhood obesity? A meta-regression

|                                 |                                                                                                                                                                                                                                                                                                                                                                                                                                                |
|---------------------------------|------------------------------------------------------------------------------------------------------------------------------------------------------------------------------------------------------------------------------------------------------------------------------------------------------------------------------------------------------------------------------------------------------------------------------------------------|
| Journal:                        | <i>BMJ Open</i>                                                                                                                                                                                                                                                                                                                                                                                                                                |
| Manuscript ID                   | bmjopen-2018-028231.R1                                                                                                                                                                                                                                                                                                                                                                                                                         |
| Article Type:                   | Research                                                                                                                                                                                                                                                                                                                                                                                                                                       |
| Date Submitted by the Author:   | 12-Apr-2019                                                                                                                                                                                                                                                                                                                                                                                                                                    |
| Complete List of Authors:       | Birch, Laura; NIHR Bristol Biomedical Research Centre - Nutrition<br>Perry, Rachel; NIHR Bristol Biomedical Research Centre - Nutrition<br>Hunt, Linda<br>Matson, Rhys; NIHR Bristol Biomedical Research Centre - Nutrition<br>Chong, Amanda; NIHR Bristol Biomedical Research Centre - Nutrition<br>Beynon, Rhona; NIHR Bristol Biomedical Research Centre - Nutrition<br>Shield, Julian; NIHR Bristol Biomedical Research Centre - Nutrition |
| <b>Primary Subject Heading</b>: | Paediatrics                                                                                                                                                                                                                                                                                                                                                                                                                                    |
| Secondary Subject Heading:      | Nutrition and metabolism, Public health                                                                                                                                                                                                                                                                                                                                                                                                        |
| Keywords:                       | obesity, childhood, adolescence, body mass index, body fat                                                                                                                                                                                                                                                                                                                                                                                     |
|                                 |                                                                                                                                                                                                                                                                                                                                                                                                                                                |

SCHOLARONE™  
Manuscripts

1  
2  
3 **What change in body mass index is associated with improvement in percentage body fat**  
4 **in childhood obesity? A meta-regression.**  
5

6  
7 Laura Birch<sup>a</sup>, RD MSc, Rachel Perry<sup>a</sup>, PhD, Linda P Hunt<sup>t</sup>, PhD, Rhys IB Matson<sup>a</sup>, MSc,  
8 Amanda Chong<sup>a</sup>, BSc, Rhona Beynon<sup>a</sup>, MSc, Julian PH Shield<sup>a,b</sup> MD  
9

10 **Affiliations:** <sup>a</sup> NIHR Bristol Biomedical Research Centre – Nutrition Theme, Level 3  
11 University Hospitals Bristol Education Centre, Upper Maudlin Street, Bristol.  
12

13 <sup>b</sup> University Hospitals Bristol NHS Foundation Trust, Level 6 University Hospitals Bristol  
14 Education Centre, Upper Maudlin Street, Bristol.  
15

16  
17 **Address correspondence to:** Laura Birch, NIHR Bristol Biomedical Research Centre –  
18 Nutrition Theme, Level 3 University Hospitals Bristol Education Centre, Upper Maudlin  
19 Street, Bristol, UK, BS2 8AE, [laura.birch@bristol.ac.uk], +44 (0)117 3421763  
20

21 [Rachel.Perry@bristol.ac.uk](mailto:Rachel.Perry@bristol.ac.uk)

22 [L.P.Hunt@bristol.ac.uk](mailto:L.P.Hunt@bristol.ac.uk)

23 [Rhys20@me.com](mailto:Rhys20@me.com)

24 [ac14629@bristol.ac.uk](mailto:ac14629@bristol.ac.uk)

25 [rhona.beynon@bristol.ac.uk](mailto:rhona.beynon@bristol.ac.uk)

26 [J.P.H.Shield@bristol.ac.uk](mailto:J.P.H.Shield@bristol.ac.uk)  
27  
28  
29

30 **Short title:** BMI change to reduce body fat in childhood obesity  
31

32 **Financial Disclosure:** The authors have no financial relationships relevant to this article to  
33 disclose.  
34

35 **Funding Source:** This study was supported by the NIHR Biomedical Research Centre at  
36 University Hospitals Bristol NHS Foundation Trust and the University of Bristol. The views  
37 expressed in this publication are those of the authors and not necessarily those of the NHS, the  
38 National Institute for Health Research or the Department of Health.  
39

40 **Conflict of Interest:** Professor Hamilton-Shield is a lead author on two studies included in  
41 the systematic review that this paper reports on. The other authors have no conflicts of  
42 interest to disclose.  
43  
44

45 **Key words:** obesity, childhood, adolescence, body mass index, body fat  
46

47 **Abbreviations:**

48 BMI-SDS: body mass index- standard deviation score

49 RCT: randomised controlled trial

50 IOTF: International Obesity Task Force

51 HOMA: Homeostatic model assessment

52 LDL: Low-density lipoprotein

53 HDL: High-density lipoprotein

54 IL6: Interleukin 6

55 ALT: Alanine transaminase

56 HTA: Health Technology Assessment

57 SD: standard deviation

58 SE: standard error  
59  
60

1  
2  
3 CI: Confidence interval  
4 PI: Prediction interval  
5 IQR: Interquartile range  
6  
7  
8

9 **Word count: 4050**  
10  
11  
12  
13  
14  
15  
16  
17  
18  
19  
20  
21  
22  
23  
24  
25  
26  
27  
28  
29  
30  
31  
32  
33  
34  
35  
36  
37  
38  
39  
40  
41  
42  
43  
44  
45  
46  
47  
48  
49  
50  
51  
52  
53  
54  
55  
56  
57  
58  
59  
60

For peer review only



## Abstract

**Objective:** Using meta-regression this paper sets out the minimum change in BMI-SDS required to improve adiposity as percentage body fat for obese children and adolescents.

**Design:** Meta-regression.

**Setting:** Studies were identified as part of a large-scale systematic review of the following electronic databases: AMED, Embase, MEDLINE via OVID, Web of Science and CENTRAL via Cochrane library.

**Participants:** Individuals aged 4–19 years with a diagnosis of obesity according to defined BMI thresholds.

**Interventions:** Studies of lifestyle treatment interventions that included dietary, physical activity and/or behavioural components with the objective of reducing obesity were included. Interventions of less than 2 weeks duration and those that involved surgical and/or pharmacological components (e.g. bariatric surgery, drug therapy) were excluded.

**Primary and secondary outcome measures:** To be included in this review, studies had to report baseline and post-intervention BMI-SDS or change measurements (primary outcome measures) plus one or more of the following markers of metabolic health (secondary outcome measures): adiposity measures other than BMI; blood pressure; glucose; inflammation; insulin sensitivity/resistance; lipid profile; liver function. This paper focuses on adiposity measures only. Further papers in this series will report on other outcome measures.

**Results:** This paper explores the potential impact of BMI-SDS reduction in terms of change in percentage body fat. Thirty-nine studies reporting change in mean percentage body fat were analysed. Meta-regression demonstrated that reduction of at least 0.6 in mean BMI-SDS ensured a mean reduction of percentage body fat mass, in the sense that the associated 95% prediction interval for change in mean percentage body fat was wholly negative.

**Conclusions:** Interventions demonstrating reductions of 0.6 BMI-SDS might be termed successful in reducing adiposity; a key purpose of weight management interventions.

**Trial registration:** The main review is registered on PROSPERO international prospective register of systematic reviews (PROSPERO 2016 CRD42016025317).

## Article Summary

### Strengths and limitations of this study

- We believe that this is the first paper to attempt to bring together all studies that have reported both a change in BMI-SDS and changes in a marker of adiposity in the obese paediatric population.
- The systematic methods employed to identify the included studies were stringent, but it is possible that some relevant studies might have been missed.
- There was some variation in the reporting of results where there were multiple publications of the same study; in these cases, the results from the most comprehensive paper have been used.
- Studies that did not report change in mean percentage body fat could not be included in this meta-regression.

### Introduction

Childhood obesity is one of the most serious global public health challenges of the twenty-first century<sup>1</sup>. In England, the latest figures from the National Child Measurement Programme, which measures the height and weight of around one million school children every year, showed that 9.5 percent of children aged 4–5 years and 20.1 percent of those aged 10–11 years were obese<sup>2,3</sup>. Childhood obesity has adverse health consequences in both the short-and long-term; including an increased risk of developing metabolic disturbances, including hypertension, dyslipidaemia and insulin resistance, and becoming obese adults<sup>4</sup>. The presence of adverse changes in cardiac and vascular function and type 2 diabetes, which were previously considered adult morbidities, now being identified in obese children and adolescents<sup>5-11</sup> illustrates the urgent need for effective weight management treatment interventions to reduce adiposity and improve the metabolic health status of the paediatric population.

Moderate weight loss has been shown to have a positive impact on many metabolic and cardiovascular risk factors<sup>12,13</sup>. Weight management interventions for obese adults that result in a 5-10 percent decrease in body weight are associated with significant improvements in blood pressure, serum lipid levels and glucose tolerance<sup>14</sup> and reduction in the prevalence of

1  
2  
3 hypertension and diabetes<sup>15</sup>. Minimum weight management targets can therefore be set to  
4  
5 improve metabolic health in this population<sup>16</sup>.  
6  
7  
8  
9

10 During childhood, all measurements over time are complicated by the influence of growth,  
11  
12 meaning that cut-offs routinely used in the adult population cannot be used in children and  
13  
14 adolescents. However, measured values of body mass index (BMI) can be standardized into  
15  
16 standard deviation scores (SDS) in respect to reference populations<sup>17</sup>. These standardised scores,  
17  
18 referred to as BMI-SDS throughout this paper, provide a normalised measurement for the degree  
19  
20 of obesity in children and young people, indicating to what degree an individual BMI lies above  
21  
22 or below the median BMI value.  
23  
24  
25  
26  
27

28 A meta-analysis by Ho *et al*<sup>18</sup> concluded that lifestyle interventions can lead to improvements  
29  
30 in weight and cardio-metabolic outcomes in child obesity. However, whilst numerous lifestyle  
31  
32 intervention programmes to tackle childhood obesity are conducted across the UK, and many  
33  
34 describe statistically significant reductions in BMI-SDS<sup>19</sup>, these results do not necessarily  
35  
36 translate into clinical benefit for the individual. How reducing BMI-SDS in a trial translates to a  
37  
38 reduction in adiposity is uncertain.  
39  
40  
41  
42  
43  
44  
45

46 Paediatric weight management guidelines exist in many countries to promote best practice, but  
47  
48 at present many of these recommendations are based on low-grade scientific evidence<sup>20</sup>.  
49  
50 Understanding how much BMI must be reduced to positively affect body composition and  
51  
52 metabolic health is important to ensure that treatment interventions are appropriately designed  
53  
54 and evaluated<sup>21</sup>.  
55  
56  
57  
58  
59  
60

1  
2  
3 Given the scale of the obesity problem and the significant and sustained adverse effects on  
4 health, clinically effective paediatric weight management treatment options are vital. A meta-  
5 analysis of cardiovascular disease risk in healthy children and its association with BMI has been  
6 conducted<sup>22</sup> but there is yet to be a systematic quantification of the reduction in BMI required to  
7 improve adiposity in the obese paediatric population.  
8  
9  
10  
11  
12  
13  
14  
15  
16

17 It is important to highlight that when assessing interventions designed to manage overweight  
18 and obesity in children and adolescents, it is essential to recognise that measures such as BMI  
19 and derived SDS scores are surrogates of the real purpose: reduction of adiposity, fat being the  
20 key organ involved in metabolic complications<sup>23</sup>. To rigorously assess the clinical and cost  
21 effectiveness of weight management interventions in young people, it is first necessary to  
22 understand what BMI-SDS change means in terms of key outcomes such as effects on adiposity.  
23 This paper is designed to put BMI-SDS changes in context when considering improvement in  
24 adiposity (fatness). Through meta-regression analysis we explore the potential impact of BMI-  
25 SDS reduction in terms of change in percentage body fat. The outcome of which will both inform  
26 clinical guidelines for paediatric weight management interventions and guide outcome measures  
27 in future clinical trials.  
28  
29  
30  
31  
32  
33  
34  
35  
36  
37  
38  
39  
40  
41  
42  
43  
44  
45  
46

## 47 **Objective**

48 This paper aims to establish the minimum change in BMI-SDS needed to effect improvements  
49 in adiposity markers of obese children and adolescents. This is the first of a series of three papers  
50 reporting on the findings from studies identified in a large systematic review (N=90 studies;  
51 searched up to May 2017) and focuses on the evidence in relation to adiposity (percentage body  
52 fat); the others relating to metabolic and cardiovascular health.  
53  
54  
55  
56  
57  
58  
59  
60

## Methods

The studies included in this paper were identified as part of large-scale systematic review (PROSPERO CRD42016025317). The protocol for this systematic review is available: <https://doi.org/10.1186/s13643-016-0299-0>. The final search was conducted in May 2017, the review was completed in January 2018 and the results are still being evaluated.

### *Participants*

Studies with participants aged 4–19 years with a diagnosis of obesity using defined BMI thresholds were considered for inclusion. BMI-SDS was calculated as a function of the degree of obesity of the subjects when compared with BMI references. BMI standards included, but were not limited to, the 98th centile on the UK 1990 growth reference chart<sup>24</sup>, 95th percentile on the US Centre for Disease Control and Prevention growth chart<sup>25</sup>, the International Obesity Taskforce (IOTF) BMI for age cut-points<sup>26</sup> and the World Health Organisation growth references<sup>27,28</sup>, in addition to country-specific obesity thresholds using BMI reference data from their paediatric populations. Studies that included overweight, as opposed to obese, individuals, pregnant females, or those with a critical illness, endocrine disorders or syndromic obesity were excluded from this review.

### *Interventions*

Studies of lifestyle treatment interventions that included dietary, physical activity and/or behavioural components with the objective of reducing obesity were included. Interventions of less than 2 weeks duration and those that involved surgical and/or pharmacological components (e.g. bariatric surgery, drug therapy) were excluded. Studies focused on obesity prevention were also excluded. No restrictions were imposed regarding the setting or delivery of the interventions.

### *Outcome measures*

To meet the inclusion criteria of the full systematic review, interventions had to report baseline (pre-) and post-intervention BMI-SDS or change measurements of BMI-SDS plus one or more markers of metabolic health (please refer to the published protocol paper for a complete list of the metabolic health markers of interest; <https://doi.org/10.1186/s13643-016-0299-0>).

This paper focuses on change in BMI-SDS and adiposity measures other than BMI, including waist circumference and percentage body fat.

### *Study design*

Completed, published, randomised controlled trials (RCTs) and non-randomised studies (cohort studies) of lifestyle treatment interventions for obese children and adolescents, with or without follow-up.

### *Ethics*

Ethical approval was not required as this paper reviewed published studies only.

### *Patient and Public involvement*

There was no patient or public involvement in this review of published studies.

### *Information sources and search methods*

Studies were identified by searching five electronic databases from inception to May 2017 (AMED, Embase, MEDLINE via OVID, Web of Science and CENTRAL via Cochrane library), alongside scanning reference lists of included articles and through consultation with experts in the field. The search strategy for MEDLINE database is presented in Appendix 1.

### *Study Selection and data extraction*

Titles and abstracts were assessed for eligibility and the data outcome measures described previously were extracted by two independent reviewers from the review team (LB, AC, RP, RB) using a standardised data extraction template, which was piloted by both reviewers before starting the review to ensure consistency.

### *Data availability*

No additional data available.

### *Quality assessment*

The focus of this study is the relationship between change in BMI-SDS and change in metabolic health parameters, rather than the specific treatment interventions that effect those changes. Therefore, risk of bias tools, such as the Cochrane Risk of Bias tool<sup>29</sup>, were not considered appropriate. The included studies were assessed for methodological quality by two members of the review team during the data extraction process using the Quality Assessment tool utilised in the 2004 Health Technology Assessment (HTA) systematic review of the long-term effects and economic consequences of treatments for obesity and implications for health improvement<sup>30</sup>. This Quality Assessment tool comprises 20 questions which are added together to give a final score and a percentage rating, from which a level of quality is assigned. Any discrepancies in Quality Assessment scoring were resolved through discussion.

### *Analysis*

We carried out random-effects meta-regression as implemented in Stata<sup>31</sup> to try to quantify the relationship between mean change in BMI-SDS (independent, predictor variable) and mean change in percentage body fat (target variable), where these were either reported, or were able

1  
2  
3 to be calculated from reported data. Further details are given below. We were not trying to assess  
4 the relative effects of the various interventions, but rather to examine the relationship between  
5 these two outcomes. Meta-regression allows for residual heterogeneity in the target variable not  
6 explained by the predictor. Subsets from the same study (e.g. intervention vs control, boys vs  
7 girls, see below) were regarded as independent observations provided there was no data  
8 duplication.  
9  
10  
11  
12  
13  
14  
15  
16  
17  
18

## 19 **Results**

### 20 *Search Results*

21  
22 In total, 98 published articles relating to 90 different studies met the inclusion criteria for the  
23 entire systematic review. See Figure 1 for a flow diagram illustrating the number of papers  
24 excluded at each stage of the review. For studies reported in multiple publications, the reference  
25 that provided the most comprehensive information has been used (see footnote of Table 1 for  
26 details).  
27  
28  
29  
30  
31  
32  
33  
34  
35  
36  
37

### 38 ***Figure 1: Flow diagram from the systematic review that identified the included studies***

39  
40  
41  
42 The Venn diagram (Figure 2) illustrates how many studies were identified for the various  
43 markers of metabolic health. Seventy-three studies assessed and reported adiposity measures.  
44 The adiposity measures reported included percentage body fat, body fat-SDS, body mass, fat  
45 mass, fat-free-mass, waist circumference and waist circumference-SDS. The 68 studies that  
46 examined diabetes/inflammation measures (HOMA-IR, insulin, glucose, C-reactive protein,  
47 Interleukin-6, Alanine transaminase and the 71 studies examining cardiac measures (e.g. lipids,  
48 cholesterol, blood pressure) will be reported separately.  
49  
50  
51  
52  
53  
54  
55  
56  
57  
58  
59  
60



1  
2  
3 **Figure 2: Venn diagram illustrating the markers of metabolic health measured**  
4  
5  
6

7 *Studies for inclusion in meta-regression analysis*  
8

9  
10 Seventy-three studies assessed and reported adiposity measures. Of the different adiposity  
11 measures that were reported in these studies (percentage body fat, body fat-SDS, body mass, fat  
12 mass, fat-free-mass, waist circumference and waist circumference-SDS), we elected to examine  
13 percentage body fat as it was far more frequently reported across studies. Therefore, of the 73  
14 adiposity studies, we conducted our meta-regression on 39 studies which reported percentage  
15 body fat values. These studies are presented in Table 1 with the corresponding changes in BMI-  
16 SDS.  
17  
18  
19  
20  
21  
22  
23  
24  
25  
26  
27

28 The results of five studies were duplicated in multiple papers, thus the reference that reported  
29 the most comprehensive information was used in the analysis; see Table 1 footnote for details.  
30  
31 Thirty-four studies were excluded from the meta-analysis; the characteristics of the excluded  
32 studies, along with the reason for exclusion, are summarised in Appendix 2.  
33  
34  
35  
36  
37  
38  
39  
40  
41  
42  
43  
44  
45  
46  
47  
48  
49  
50  
51  
52  
53  
54  
55  
56  
57  
58  
59  
60

**Table 1: Characteristics of studies reporting adiposity outcomes with results of mean change in BMI-SDS and percentage body fat**

|   | Author, Year, Country (Intervention name)              | Study design: Sample size (n) Analysed (An)              | Obesity definition                                                                               | Age range (inclusion): Mean $\pm$ (SD) Sex (% F)                            | Pubertal status measured | Diet D)/ Exercise (E)/D+E: Setting | Format & content                                                                                                                                                                                                                                                                                                                                                                                                                                                                                                 | Duration (mths) Follow up (mths) | Method of % body fat measurement  | $\Delta$ BMI SDS/z-score by subgroup when reported | $\Delta$ % body fat score by subgroup when reported |
|---|--------------------------------------------------------|----------------------------------------------------------|--------------------------------------------------------------------------------------------------|-----------------------------------------------------------------------------|--------------------------|------------------------------------|------------------------------------------------------------------------------------------------------------------------------------------------------------------------------------------------------------------------------------------------------------------------------------------------------------------------------------------------------------------------------------------------------------------------------------------------------------------------------------------------------------------|----------------------------------|-----------------------------------|----------------------------------------------------|-----------------------------------------------------|
| 1 | Bell 2007 <sup>32</sup><br>Australia                   | Cohort<br>Total = 14 (14)                                | BMI $\geq$ 95 <sup>th</sup> %ile                                                                 | Age range:9-16<br>12.70(2.32); F=43%                                        | Yes-<br>Tanner           | E:<br>community                    | 8 weeks structured circuits exercise training:<br>3 x 1hr sessions/week. No standard dietary modifications.                                                                                                                                                                                                                                                                                                                                                                                                      | 2:<br>0                          | DXA                               | All:-0.03                                          | All:-0.57                                           |
| 2 | Bock 2014 <sup>33</sup><br>Canada<br><b>HIP KIDS</b>   | Cohort:<br>Total = 42 (41)                               | BMI $\geq$ 95 <sup>th</sup> %ile<br>(CDC)                                                        | Age range: 8-17<br>12.8 $\pm$ 3.14; F=50%                                   | Yes - Tanner             | D+E:<br>Clinic (Hospital)          | Intensive phase (3 mths): bi-wkly 90 min counselling. Maintenance phase (9 months): alternating mthly GP or individual sessions (90 mins). Sessions focus on exercise/psychosocial/behavioural aspects.                                                                                                                                                                                                                                                                                                          | 12:<br>0                         | BIA                               | All: -0.04                                         | All: -1.39                                          |
| 3 | Bruyndonckz, 2015 <sup>34</sup><br>Belgium             | Quasi-RCT:<br>Total = 61<br>IG = 33 (27)<br>CG = 28 (21) | BMI $\geq$ 97 <sup>th</sup> %ile adolescents <16 yrs;<br>BMI $\geq$ 35 adolescents $\geq$ 16 yrs | Age range:12-18<br>IG: 15.4 $\pm$ 1.5; F = 79%<br>CG: 15.1 $\pm$ 1.2; F=73% | NR                       | D+E:<br>Clinic (Hospital)          | Intervention: Dietary restriction 1500-1800 kcal/day + 2 hrs/day supervised play/lifestyle activities + 2hrs/wk PE + 3 x 40min/wk supervised training session.<br>Control: Usual care.                                                                                                                                                                                                                                                                                                                           | 10:<br>0                         | Subsample also measured using DXA | IG: -1.21<br>CG: 0.13                              | IG: -11.30<br>CG: 0.4                               |
| 4 | Bustos 2015 <sup>35</sup><br>Chile                     | Cohort:<br>Total = 50 (28 completed)                     | CDC                                                                                              | Age range: NR<br>9.5 $\pm$ 1.9; F=48%                                       | NR                       | D+E:<br>Academic Institution       | Nutrition/behavioural modification session 40 min/wk + PA 50 min x2/wk+ Family support every 15 days for first 2 mths, then mthly.                                                                                                                                                                                                                                                                                                                                                                               | 8:<br>0                          | DXA                               | All: -0.3                                          | All: -3.00                                          |
| 5 | Calcaterra 2013 <sup>36</sup><br>Italy                 | Cohort:<br>Total = 22 (22)                               | BMI > 95 <sup>th</sup> %ile                                                                      | Age range: 9-16<br>13.23 $\pm$ 1.76; F=41%                                  | Yes - Tanner             | E:<br>Academic Institution         | 2 x 90 mins exercise training sessions/wk                                                                                                                                                                                                                                                                                                                                                                                                                                                                        | 3:<br>0                          | BIA                               | All: -0.15                                         | All: -3.30                                          |
| 6 | Dobe 2011 <sup>37</sup><br>Germany<br>OBELDICKS – mini | Cohort:<br>Total = 103 (103)                             | >97 <sup>th</sup> to 99.5 percentile                                                             | Age range: 4-8<br>6.1 $\pm$ 1<br>F=56%                                      | NR                       | D+E:<br>Academic Institution       | Obeldicks mini: focus on training parents (22.5 hrs for parents, 4.5 hrs for children). Group sessions. Parents+children classes every 4 <sup>th</sup> session, Children's classes: 9 x monthly sessions (30 mins): 1 x introduction; 3 x diet; 5 x eating habits Parenting classes: 13 x monthly sessions (1.5 hrs): 1x introduction 1x medicine 3x nutrition 5x eating habits + education tips 3x discussion circle Individual consultation: every 2 months (30 mins) Exercise: 50 x weekly sessions (1.5 hrs) | 12:<br>0                         | BIA                               | Obeldicks-mini: -0.46                              | Obeldicks mini: -3.00                               |

1  
2

|   |    |                                                                                                                                            |                                                                                                  |                                                                                                                                   |                                                                                                               |                                                                                     |                                                |                                                                                                                                                                                        |                                        |                                                |                                        |                                     |
|---|----|--------------------------------------------------------------------------------------------------------------------------------------------|--------------------------------------------------------------------------------------------------|-----------------------------------------------------------------------------------------------------------------------------------|---------------------------------------------------------------------------------------------------------------|-------------------------------------------------------------------------------------|------------------------------------------------|----------------------------------------------------------------------------------------------------------------------------------------------------------------------------------------|----------------------------------------|------------------------------------------------|----------------------------------------|-------------------------------------|
| 3 | 7  | Farpour-Lambert, 2009 <sup>38</sup><br>Switzerland                                                                                         | RCT:<br>Total = 44<br>IG= 22 (22)<br>OC =22 (22)                                                 | BMI > 97 <sup>th</sup> %ile                                                                                                       | Age range: 6-11<br>8.9 ± 1.5<br>IG: F=59%<br>OC: F= 68%                                                       | Yes                                                                                 | E<br>Clinic (Hospital)                         | 180 min/wk PA + 135 min/wk PE                                                                                                                                                          | 3:<br>0                                | Skinfold<br>measurements                       | IG: -0.1<br>CG: 0                      | IG: -1.50<br>CG: 0.80               |
| 4 | 8  | Ford, 2010a,b<br>UK <sup>39,40</sup>                                                                                                       | RCT:<br>Total = 106 (91)<br>Gp1 SC = 52<br>(46)<br>Gp 2<br>Mandometer =<br>54 (45)               | BMI ≥ 95 <sup>th</sup> %ile<br>(CDC)                                                                                              | Mandometer: 9.0 -<br>16.9<br>SC: 9.1 - 17.5<br>Mandometer: 12.7 ±<br>2.2<br>SC: 12.5 ± 2.3<br>overall F=56%   | Yes                                                                                 | D<br>Clinic (Hospital)                         | Mandometer device to regulate rate of<br>eating and total intake vs SC                                                                                                                 | 12:<br>0                               | DXA                                            | IG:-0.36<br>CG:-0.14                   | IG:-4.60<br>CG:-1.30                |
| 5 | 9  | Gajewska,<br>2016 <sup>41</sup> Poland                                                                                                     | Cohort:<br>Total = 100 (76)<br>With WL =71<br>(56)<br>Without WL =<br>29 (20)                    | BMI SDS > 2                                                                                                                       | Age range: 5-10<br>with WL: 8.1(6.8-9.2);<br>F= 51%<br>without WL: 8,8(7,3-<br>9.6); F=59%<br>overall F = 53% | reported with<br>Tanner stage,<br>any with<br>pubertal<br>develop-ment<br>excluded. | D+E:<br>Community &<br>Academic<br>institution | 3-mth intervention, low energy diet (1200-<br>1400kcal), 3-5 meals every day, instructions<br>concerning PA, 10-14 food day diary, 3-day<br>food diary.                                | 3:<br>0                                | BIA                                            | WL: -0.98<br>No WL:-0.2                | WL:-2.90<br>No WL:0.30              |
| 6 | 10 | Garanty-<br>Bogacka,<br>2011 <sup>42</sup> Poland                                                                                          | Cohort:<br>Total = 50 (50)                                                                       | BMI > 97 <sup>th</sup> %ile<br>(Polish ref pop.)                                                                                  | Age range:8-18<br>14.2 ± 2.6; F=58%                                                                           | Yes                                                                                 | D+E:<br>Clinic (Hospital)                      | Exercise therapy (Instructions in PA +<br>reducing sedentary behaviour) + Reduction<br>in fat and sugar intake.                                                                        | 6:<br>0                                | Skinfold<br>measurements &<br>Lohman's formula | All:-1                                 | All: -4.70                          |
| 7 | 11 | Grønbaek<br>2012 <sup>43</sup> &<br>Kazankov<br>2014 <sup>44</sup><br>Denmark<br><b>Julemaerkehj<br/>emmet<br/>Hobro (same<br/>cohort)</b> | Cohort:<br>Total = 117<br>(117)<br>(n=71 attended<br>12 mth FU)                                  | NR.<br>Obese. BL BMI-<br>SDS: 2.93±0.52                                                                                           | Age range: NR<br>12.1 ± 1.3<br>F=56%                                                                          | NR                                                                                  | D+E:<br>Community                              | Individually designed healthy diet +<br>moderately strenuous PA program (at least<br>1hr/day).                                                                                         | 2.5<br>months/10<br>weeks:<br>12mth FU | BIA                                            | All: -0.63                             | All:-4.30                           |
| 8 | 12 | Hvidt 2014 <sup>45</sup><br>Denmark                                                                                                        | Cohort:<br>Total = 61 (61)                                                                       | Children's<br>Obesity Clinic;<br>BMI > 90 <sup>th</sup> %ile<br>(Danish ref<br>pop.) = z-score<br>1.28. BL BMI-<br>SDS: 2.73±0.60 | Age range:10-18<br>Median: 12.5<br>F=54%                                                                      | NR                                                                                  | D+E:<br>Clinic (Hospital)                      | Family-centred approach involving<br>behaviour changing techniques (90 advice<br>and advice strategies on low-calorie diet +<br>activity e.g. 10-20 items aimed to reduce<br>obesity). | 12:<br>0                               | BIA                                            | All: -0.21                             | All: -3.40                          |
| 9 | 13 | Kirk, 2005 <sup>46</sup><br>USA                                                                                                            | Cohort:<br>Total = 177<br>(177)<br>Children (5-<br>10yrs) = 85<br>Adolescents<br>(11-19yrs) = 92 | BMI > 95 <sup>th</sup> %ile                                                                                                       | Age range: 5-19<br>9.0 ± 1.5<br>Overall F=61%<br>Children: F = 24%<br>Adolescents: F = 59%                    | NR                                                                                  | D+E:<br>Clinic (Hospital)                      | Behavioural intervention with individualised<br>behavioural goals for nutrition, PA & family<br>support.                                                                               | 5:<br>6                                | DXA                                            | GP1: -0.18<br>GP2: -0.13<br>All: -0.15 | GP1:-2.10<br>GP2:-2.40<br>All:-2.20 |

39  
40  
41  
42  
43  
44  
45  
46

1  
2  
3  
4  
5  
6  
7  
8  
9  
10  
11  
12  
13  
14  
15  
16  
17  
18  
19  
20  
21  
22  
23  
24  
25  
26  
27  
28  
29  
30  
31  
32  
33  
34  
35  
36  
37  
38  
39  
40  
41  
42  
43  
44  
45  
46

|    |                                                                                                |                                                                          |                                                               |                                                                                          |                 |                           |                                                                                                                                                                                                                                                                                 |                |                                                                 |                                                     |                                                     |
|----|------------------------------------------------------------------------------------------------|--------------------------------------------------------------------------|---------------------------------------------------------------|------------------------------------------------------------------------------------------|-----------------|---------------------------|---------------------------------------------------------------------------------------------------------------------------------------------------------------------------------------------------------------------------------------------------------------------------------|----------------|-----------------------------------------------------------------|-----------------------------------------------------|-----------------------------------------------------|
| 14 | Klijn 2007 <sup>47</sup><br>The Netherlands                                                    | Cohort:<br>Total = 15 (15)                                               | BMI>30                                                        | Age range:10-18<br>14.7(2.1); F=NR                                                       | NR              | E:<br>Community           | Aerobic exercise training programme – 12 weeks; 3 x 30-60 min aerobic group sessions/week (2x gym/outdoors, 1 x swimming pool). P.E teacher led. Diverse indoor, outdoor and swimming activities.                                                                               | 3:<br>0        | % body fat calculated by “dividing fat mass by total body mass” | All: -0.4                                           | All: -3.80                                          |
| 15 | Lazzer 2008 <sup>48</sup><br>Italy                                                             | Cohort:<br>Total = 19<br>Boys = 7 (7)<br>Girls = 12 (12)                 | BMI > 97 <sup>th</sup> %ile                                   | Age range: 8-12<br>Boys: 9.9 ±1.6<br>Girls:11.2 ± 1.5<br>Overall F=63%                   | Yes –<br>Tanner | D+E:<br>Community         | 2 x 50min/wk endurance training + 2hr/wk PE lessons + 1 x wk child & parent dietetic class + 1 x wk psychological group class.                                                                                                                                                  | 8:<br>12       | DXA                                                             | Boys: -0.4<br>Girls: -0.2                           | Boys: -4.00<br>Girls: -2.20                         |
| 16 | Meyer 2006 <sup>49</sup><br>Germany                                                            | RCT:<br>Total = 67<br>IG=33 (33)<br>OC=34 (34)                           | BMI > 97 <sup>th</sup> %ile<br>(German paediatric population) | Age range: 11-16<br>IG: 13.7 ± 2.1; F=48%<br>OC: 14.1 ± 2.4; F =50%                      | Yes - Tanner    | E:<br>Clinic (Hospital)   | 3 x exercise sessions (Monday: swimming and aqua aerobic training 60 min + Wednesday sports games 90 min + Friday walking 60 min)/ wk;<br>Control: Maintain current level of PA                                                                                                 | 6:<br>0        | BIA                                                             | IG: -0.43<br>CG: -0.14                              | IG: -1.00<br>CG: 0.00                               |
| 17 | Miraglia 2015 <sup>50</sup><br>Brazil                                                          | Cohort:<br>Total = 27 (27)                                               | BMI z-score > 2                                               | Age range: 6-13<br>Median 10.3; F=48%                                                    | NR              | D+E:<br>Clinic (Hospital) | AmO: Outpatient Ambulatory. Obesity outpatient clinic - lifestyle change based on goals agreed relative to feeding habits & physical exercise, followed mthly. 12 mths: Subjects assessed at inclusion & after 12 mths of FU to obtain anthropometric & adipokine measurements. | 12:<br>0       | BIA                                                             | All: -0.4                                           | All: -0.10                                          |
| 18 | Morell-Azanza 2016 <sup>51</sup><br>Rendo-Urteaga 2015 <sup>52</sup><br>Spain<br>(same cohort) | Cohort:<br>Total = 54 (40)<br>high responders =21<br>low responders = 19 | OW/OB as per Cole <i>et al</i> 2000                           | Age range: 7-15<br>Mean =11<br>F=53% (of N analysed)                                     | Yes –<br>Tanner | D:<br>Clinic (Hospital)   | Moderate energy-restricted diet + nutritional education sessions with dietitian + family involvement.                                                                                                                                                                           | 2.5:<br>0      | BIA                                                             | HR:-0.79<br>LR: -0.18<br><br>HR: -0.64<br>LR: -0.07 | HR:-3.10<br>LR: -0.60<br><br>HR: -2.49<br>LR: -0.37 |
| 19 | Murer 2011 <sup>53</sup><br>Aeberli, 2010 <sup>54</sup><br>Switzerland<br>(same cohort)        | Cohort:<br>Total = 206<br>(203)                                          | BMI > 98 <sup>th</sup> %ile                                   | Age range:10-18<br>14.1 ± 1.9; F=44%                                                     | NR              | D+E:<br>Clinic/hospital   | Moderate caloric restriction.2 x 60-90min/day endurance exercise + 4-5 hr/wk. exercise session + behaviour modification.                                                                                                                                                        | 2:<br>0        | BIA                                                             | All: -0.42                                          | All: -5.50                                          |
| 20 | Murdolo 2017 <sup>55</sup><br>Italy                                                            | Cohort:<br>Total = 53(53)<br>Responders = 44<br>Non-responders = 9       | NR                                                            | Age range: 5-13<br>Responders: 9.0 ± 1.1;<br>F=50%<br>Non-responders: 2.09 ± 0.32; F=33% | Yes -Tanner     | D+E:<br>Community         | Educational Wt Excess Reduction Program                                                                                                                                                                                                                                         | 24:<br>>6 mths | BIA                                                             | Responders:<br>-0.44<br>Non-responders:<br>0.11     | Responders<br>:-2.90<br>Non-responders:<br>-2.00    |

1  
2  
3  
4  
5  
6  
7  
8  
9  
10  
11  
12  
13  
14  
15  
16  
17  
18  
19  
20  
21  
22  
23  
24  
25  
26  
27  
28  
29  
30  
31  
32  
33  
34  
35  
36  
37  
38  
39  
40  
41  
42  
43  
44  
45  
46

|    |                                                                                  |                                                                                        |                                                |                                                                                                          |                 |                           |                                                                                                                                                                                                                                                                                                                                                                                                                 |      |                               |                                 |                                       |
|----|----------------------------------------------------------------------------------|----------------------------------------------------------------------------------------|------------------------------------------------|----------------------------------------------------------------------------------------------------------|-----------------|---------------------------|-----------------------------------------------------------------------------------------------------------------------------------------------------------------------------------------------------------------------------------------------------------------------------------------------------------------------------------------------------------------------------------------------------------------|------|-------------------------------|---------------------------------|---------------------------------------|
| 21 | Ning 2014 <sup>56</sup> & BEAN 2011 <sup>57</sup> USA <b>TEENS (same cohort)</b> | Cohort: Total = 145** (145)                                                            | BMI ≥ 95 <sup>th</sup> %ile (CDC)              | Age range: 11-18<br>13.1<br>F=65%                                                                        | NR              | D+E: Academic Institution | 12 x 30 min nutritional session with adolescent and parent/s + Education/behavioural support sessions once every 2 wks, or alternating wks + PA 3 x 60 min/wk during initial 12 wks, then minimum of twice/wk.                                                                                                                                                                                                  | 6:0  | DXA                           | All: -0.1                       | All: -2.40                            |
| 22 | Pacifico 2013 <sup>58</sup> Italy                                                | Cohort: Total = 120 (120)                                                              | BMI > 95 <sup>th</sup> %ile                    | Age range: (11.5-12.2)<br>11.9; F=35%                                                                    | Yes (method ND) | D+E: Clinic (Hospital)    | Hypocaloric diet (25-30 Kcal/kg/day) + 60 min/day ~ 5 days/wk moderate exercise + Reduce sedentary behaviour.                                                                                                                                                                                                                                                                                                   | 12:0 | NR                            | All: -0.32                      | All: -2.10                            |
| 23 | Racil 2013 <sup>59</sup> Tunisia                                                 | RCT: Total = 34<br>HIT=11 (11)<br>MIIT=11 (11)<br>OC=12 (12)                           | BMI > 97 <sup>th</sup> %ile (French standards) | Age range: NR<br>HIIT: 15.6 ± 0.7<br>MIIT: 16.3 ± 0.52<br>OC: 15.9 ± 1.2<br>Overall F=100%               | Yes -Tanner     | D+E: Community            | 4-day diet records + HIIT or MIIT. Interval training program 3 x /wk on non-consecutive days.                                                                                                                                                                                                                                                                                                                   | 3:0  | BIA                           | HIT: -0.4<br>MIT: -0.3<br>OC: 0 | HIT: -2.90<br>MIT: -2.00<br>OC: -0.40 |
| 24 | Racil 2016 <sup>60</sup> Tunisia                                                 | RCT: Total = 47<br>HIIT =17 (17)<br>MIIT16 (16)<br>OC =14                              | BMI > 97 <sup>th</sup> %ile (French standards) | Age range: NR<br>14.2 ± 1.2; F=100%                                                                      | NR              | E: Academic Institution   | HIIT (Warm up + Interval training at 100%/50% MAS + Cooling down);<br>MIIT (Warm up + Interval training 80%/50% MAS + Cooling down)                                                                                                                                                                                                                                                                             | 3:0  | BIA                           | HIT: -0.3<br>MIT: -0.3<br>OC: 0 | HIT: -3.90<br>MIT: -3.40<br>OC: -0.50 |
| 25 | Reinehr 2004a <sup>61</sup> Germany <b>OBELDICKS</b>                             | Cohort: Total = 42 (42)                                                                | BMI ≥ 97 <sup>th</sup> %ile                    | Age range: 6.1-15.1<br>10.2; F=57%                                                                       | Yes - Tanner    | D+E: Clinic (Hospital)    | Obeldicks: Intensive phase 3 mths (Parents' course 2x/month + Behaviour therapy 2x/month + Nutritional course 2x/month + Exercise therapy 1x/wk) + Establishing phase 3 mths (Talk rounds for parents 1x/month + Psychological therapy + Exercise therapy 1x/wk) + Establishing phase 2 for 3 mths (Psychological therapy + Exercise therapy 1x/wk) + Establishing phase 3 for 3 mths (Exercise therapy 1x/wk). | 12:0 | % body fat skinfold thickness | Sig. WL-0.9<br>NS WL: -0.2      | Sig. WL:-7.50<br>NS WL:-3.00          |
| 26 | Reinehr, 2008a, b <sup>62,63</sup> Germany <b>OBELDICKS</b>                      | Cohort: Ob + Sub. WL = 25<br>Ob + no change = 18<br>Normal control = 19 (BL data only) | IOTF using pop.-specific data                  | Ob: 10.8 ± 2.6; F=61%<br>Lean C: 10.3±2.9; F=58%<br><br>Ob + Sub. WL : F= 68%<br>Ob + no change: F = 50% | Yes -Tanner     | D+E: Clinic (Hospital)    | Obeldicks                                                                                                                                                                                                                                                                                                                                                                                                       | 12:0 | % body fat skinfold thickness | WL: -0.6<br>No WL: -0.1         | WL: -8.00<br>No WL:0.00               |

1  
2  
3  
4  
5  
6  
7  
8  
9  
10  
11  
12  
13  
14  
15  
16  
17  
18  
19  
20  
21  
22  
23  
24  
25  
26  
27  
28  
29  
30  
31  
32  
33  
34  
35  
36  
37  
38  
39  
40  
41  
42  
43  
44  
45  
46

|    |                                                          |                                                                        |                                                                                                                                                                                          |                                                                                                                                       |              |                              |                                                                                                                                                                                                                                                                                                                                                                     |               |                               |                                          |                                          |
|----|----------------------------------------------------------|------------------------------------------------------------------------|------------------------------------------------------------------------------------------------------------------------------------------------------------------------------------------|---------------------------------------------------------------------------------------------------------------------------------------|--------------|------------------------------|---------------------------------------------------------------------------------------------------------------------------------------------------------------------------------------------------------------------------------------------------------------------------------------------------------------------------------------------------------------------|---------------|-------------------------------|------------------------------------------|------------------------------------------|
| 27 | Rohrer 2008 <sup>64</sup><br>Germany<br><b>Fit Kids</b>  | Cohort:<br>Total = 22 (22)<br>Unchanged<br>BMI= 12<br>Reduced BMI = 10 | BMI > 99.5 <sup>th</sup> %ile (German standard values) or BMI > 97 <sup>th</sup> %ile with obesity-associated risk factors or BMI >90 <sup>th</sup> %ile with obesity-associated disease | Age range: 7-15<br>Median: 11.9<br>F=27%<br>Unchanged BM: F = 33%<br>Reduced BMI: F=20%                                               | NR           | D+E:<br>Community            | Physical exercise (2 x wk, 100 hrs in total) + Nutritional/health education and psychological care for the child (x wk, 43.5 hrs total) and parent/s (2 x wk, 12 hrs total).                                                                                                                                                                                        | 12:<br>0      | BIA                           | Increased BMI: 0.12<br>Reduced BMI:-0.35 | Increased BMI: 1.05<br>Reduced BMI:-0.05 |
| 28 | Rolland-Cachera 2004 <sup>65</sup><br>France             | RCT:<br>Total = 99<br>PROT- = 61 (53)<br>PROT+ =60 (46)                | BMI > 97 <sup>th</sup> %ile (French reference values)                                                                                                                                    | Age range: 11-16<br>PROT- = 14.1 ± 1.2; F = 74%<br>PROT + =14.4 ± 1.3; F = 72%                                                        | NR           | D+E:<br>Academic Institution | Wt reducing diet; 7hr/wk vigorous sports + 7hr/wk outdoor activities; advice on nutrition & PA during wkends/holidays.                                                                                                                                                                                                                                              | 9:<br>12 + 24 | BIA                           | PROT- :-2.6<br>PROT+:-2.5                | PROT- :-12.40<br>PROT+:-12.10            |
| 29 | Roth 2016 <sup>66</sup><br>Germany<br><b>OBELDICKS</b>   | Cohort:<br>Total = 69<br>OB + WL = 32<br>OB + with WL = 37             | OB as per IOTF criteria                                                                                                                                                                  | NR – (see Obeldicks age range)<br>Ob with WL: 11.8 ± 2.0; F=50%<br>Ob without WL: 12.1 ± 2.1; F=51%<br>[Normal wt: 12.3 ± 3.0; F=45%] | Yes - Tanner | D+E:<br>Clinic (Hospital)    | Obeldicks                                                                                                                                                                                                                                                                                                                                                           | 12:<br>0      | % body fat skinfold thickness | WL: -0.69<br>No WL: 0.03                 | WL: -9.60<br>No WL: -4.30                |
| 30 | Savoie 2005 <sup>67</sup><br>USA<br><b>Bright Bodies</b> | Cohort:<br>Total = 33 (25)<br>SMP=10 (8)<br>BFC = 23 (17)              | BMI ≥ 95 <sup>th</sup> %ile                                                                                                                                                              | Age range: 11-16<br>13.5 ± 0.3;<br>SMP:13.3 ±0.6; F=75%<br>BFC: 13.6 ±0.3; F= 65%                                                     | NR           | D+E:<br>Academic Institution | Bright Bodies Weight Management Program: nutrition education, exercise, behavioural modification.<br>2 x 30 min exercise sessions + 1 x 45 min nutrition/behaviour medication group session per week. 4 levels: Beginner, Intermediate i, Intermediate ii, Advanced.<br>All levels 12 weeks duration.<br>Mthly maintenance classes after 1 yr (support-group style) | 12:<br>12     | BIA                           | SMP: -0.36<br>BFC: -0.12                 | SMP:-6.50<br>BFC: -4.20                  |

1  
2

|    |    |                                                                                                   |                                                                                                                     |                                      |                                                                                                          |              |                                                    |                                                                                                                                                                                                                                                                                                                                                                                                                                                                                                                          |                                   |     |                                         |                                           |
|----|----|---------------------------------------------------------------------------------------------------|---------------------------------------------------------------------------------------------------------------------|--------------------------------------|----------------------------------------------------------------------------------------------------------|--------------|----------------------------------------------------|--------------------------------------------------------------------------------------------------------------------------------------------------------------------------------------------------------------------------------------------------------------------------------------------------------------------------------------------------------------------------------------------------------------------------------------------------------------------------------------------------------------------------|-----------------------------------|-----|-----------------------------------------|-------------------------------------------|
| 3  | 31 | Savoye 2007, 2011 <sup>68,69</sup><br>USA<br><b>Bright Bodies</b><br>(data taken from 2011 paper) | RCT+ Long term<br>FU results<br>(cohort)<br>RCT Total = 174<br>BB=105<br>CC=69<br>1 YR ANALYSIS<br>BB = 75<br>CC=44 | BMI ≥ 95 <sup>th</sup> %ile<br>(CDC) | Age range: 8-16<br>BB: 12.0 ± 2.5; F=56%<br>CC: 12.5 ± 2.3; F=68%                                        | NR           | D+E:<br>Academic<br>Institution (local<br>school). | Bright Bodies Weight Management<br>Program: nutrition education, exercise,<br>behavioural modification. 2 x sessions/wk for<br>6 mths, then biweekly for next 6 mths. BB:<br>2x50 min exercise + 1x40 min<br>nutrition/behaviour modification per wk +<br>12 mths no active intervention.<br>Control group: standard care – paed.<br>obesity clinic (biannual clinic appt; diet +<br>exercise counselling) Structured tx &<br>teaching program (28 x 45 min therapeutic<br>sessions e.g. PA, nutrition, healthy cooking) | 12:<br>12<br><br>FU<br>1.5:<br>24 | BIA | IG: -0.21<br>CG: 0.01                   | IG: -3.90<br>CG: 2.10                     |
| 13 | 32 | Savoye<br>2014 <sup>70</sup><br>USA<br><b>Bright Bodies</b>                                       | RCT<br>Total = 75<br>BB=38 (31)<br>CC =37 (27)                                                                      | BMI ≥ 95 <sup>th</sup> %ile          | Age range:10-16<br>BB: 12.7 (1.9); F=68%<br>CC: 13.2 (1.8); F=62%                                        | Yes-Tanner   | D+E:<br>Academic<br>Institution                    | Bright Bodies Weight Management<br>Program: nutrition education, exercise,<br>behavioural modification. 2 x 30 min<br>exercise sessions + 1 x 45 min<br>nutrition/behaviour medication group<br>session per week. 4 levels: Beginner,<br>Intermediate I, Intermediate ii, Advanced.<br>All levels 12 weeks duration. Mthly<br>maintenance classes after 1 yr (support-<br>group style)                                                                                                                                   | 6:<br>0                           | BIA | BB: -0.05<br>CC: 0.04                   | BB: -3.30<br>CC: 0.40                     |
| 22 | 33 | Schiel 2016 <sup>71</sup><br>Germany                                                              | Cohort:<br>Total =143<br>(143)                                                                                      | BMI-SDS ≥97 <sup>th</sup><br>%ile    | Age range: NR<br>13.9 ± 2.4; F=62%                                                                       | NR           | D+E:<br>Clinic (Hospital)                          | Structured Tx & Teaching Program (STTP):<br>28 x 45 min therapeutic sessions e.g. PA,<br>nutrition, healthy cooking                                                                                                                                                                                                                                                                                                                                                                                                      | 1.5:<br>24                        | NR  | All: -0.26                              | All: -3.40                                |
| 24 | 34 | Seabra 2016 <sup>72</sup><br>Portugal                                                             | Cohort:<br>Total = 88<br>soccer =29 (29)<br>Trad. Act. =29<br>(29)<br>OC =30 (30)                                   | BMI-SDS > 2                          | Age range: 8-12<br>Soccer: 10.5 ± 1.5<br>Trad. act: 11.0 ± 1.6<br>OC=10.0 ±1.3<br>Overall F=0%           | Yes - Tanner | E:<br>Community                                    | Soccer & trad. activity programmes (3 x 60-<br>90min/wk) + 2 x 1hr at BL & 3 mths later<br>energy balance session.                                                                                                                                                                                                                                                                                                                                                                                                       | 6:<br>0                           | DXA | Soccer: -0.2<br>Trad.: -0.2<br>CG: -0.1 | Soccer:-<br>2.20<br>Trad:-4.10<br>CG:3.10 |
| 29 | 35 | Truby 2016 <sup>73</sup><br>Australia                                                             | RCT:<br>Total = 87<br>SMC =37 (33)<br>SLF=36 (32)<br>WList OC =14<br>(14)                                           | BMI > 90 <sup>th</sup> %ile<br>(CDC) | Age range: 10-17<br>SMC: 13.2 ± 1.9;<br>F=73%<br>SLF: 13.2 ± 2.1; F=72%<br>WList OC: 13.6 ±1.9;<br>F=71% | Yes -Tanner  | D:<br>Clinic (Hospital)                            | Structured modified CHO diet (35% CHO;<br>30% protein; 35% fat), structured low-fat<br>diet (55% CHO; 20% protein; 25% fat),<br>Control (no dietary advice).                                                                                                                                                                                                                                                                                                                                                             | 3:<br>0                           | BIA | SLF: -0.09<br>SMC:-0.15<br>CG: 0.02     | SLF: -0.13<br>SMC: -0.40<br>CG: 2.62      |

1  
2  
3  
4  
5  
6  
7  
8  
9  
10  
11  
12  
13  
14  
15  
16  
17  
18  
19  
20  
21  
22  
23  
24  
25  
26  
27  
28  
29  
30  
31  
32  
33  
34  
35  
36  
37  
38  
39  
40  
41  
42  
43  
44  
45  
46

|    |                                                                                              |                                                         |                                                            |                                                                            |             |                              |                                                                                                                                                                                                                                                                                                                              |          |     |                          |                          |
|----|----------------------------------------------------------------------------------------------|---------------------------------------------------------|------------------------------------------------------------|----------------------------------------------------------------------------|-------------|------------------------------|------------------------------------------------------------------------------------------------------------------------------------------------------------------------------------------------------------------------------------------------------------------------------------------------------------------------------|----------|-----|--------------------------|--------------------------|
| 36 | Van der Baan-Slootweg 2014 <sup>74</sup><br>Netherlands                                      | RCT:<br>Total = 90<br>Inpt. = 45 (37)<br>AmO = 45 (36)  | BMI z score ≥ 3.0 or > 2.3 with OB-related health problems | Age range: 8-18<br>Inpt: 13.8 ± 2.3;<br>F=58%<br>AmO: 13.9 ± 2.5;<br>F=58% | NR          | D+E:<br>Clinic (Hospital)    | Inpt. (Hospitalised 26 wks on working days - 4 days/wk 30-60min exercise + nutrition/BM once/wk + parents/caregivers 3 x 1hr lesson on nutrition/BM);<br>Ambulatory (12 visits at increasing time intervals - 1 hr exercise session + encouraged 3 x exercise/wk + 1 hr educational programme + 30 min nutrition education). | 6:<br>24 | BIA | InpT: -0.6<br>AmO: -0.35 | InP: -3.34<br>AmO: -7.87 |
| 37 | Visuthranukul 2015 <sup>75</sup><br>Thailand                                                 | RCT:<br>Total = 70 (52)<br>I =35(25)<br>OC=35 (27)      | ND.<br>BL BMI z-score:<br>I = 3.7 ±0.9<br>C = 3.6±1.6      | Age range: 9-16<br>I = 11.9 ± 1.9; F=36%<br>C = 12.0 ± 2.1; F=30%          | Yes -Tanner | D:<br>Clinic (Hospital)      | I (Low GI diet + Energy restriction 1400-1500 kcal/day + Increased exercise);<br>OC (Energy restriction 1200-1300 kcal/day + Low fat/high fibre diet + Increased exercise).                                                                                                                                                  | 6:<br>0  | BIA | IG:-0.3<br>CG: -0.3      | IG:0.10<br>CG:0.10       |
| 38 | Vitola 2009 <sup>76</sup><br>USA                                                             | Cohort:<br>Total = 8(7)                                 | BMI ≥ 95 <sup>th</sup> %ile                                | Age range: NR<br>15.3± 0.6; F=12.8%                                        | Yes -Tanner | D+E:<br>Clinic (Hospital)    | Individual behavioural therapy sessions with psychologist. Parents involvement encouraged. Self-monitoring of PA & food intake. Gradual reduction of caloric intake to ≈1200-1500 kcal/day. Ongoing therapy - wt loss therapy repeated when 5% body wt lost & wt stable for at least 4 wks                                   | NR       | DXA | All: -0.3                | All: -5.30               |
| 39 | Wickham, 2009 <sup>77</sup> & Evans, 2009 <sup>78</sup><br>USA<br><b>TEENS (same cohort)</b> | Cohort:<br>Total = 168 (64)<br>*<br>Completers only =57 | BMI ≥ 95 <sup>th</sup> %ile (CDC)                          | Age range: 11-18<br>13.9 ± 1.9; F=62%                                      | NR          | D+E:<br>Academic Institution | Exercise 1 day/wk at facility + 2 additional exercise days at facility of ppts' choice + 30 min/wk nutrition education/behavioural support sessions.                                                                                                                                                                         | 6:<br>0  | BIA | Completers: -0.07        | Completers :-1.30        |

**KEY:** %ile = percentile; AmO = outpatient ambulatory; An. = analysed; apt. = appointment; BB = Bright Bodies; BIA = bioelectrical impedance analysis; BFC = better food choices; BL = baseline; BM = behaviour modification; BMI = body mass index; C = control; CG: control group; CBT = cognitive behavioural therapy; CDC = Centre for Disease Control; CG = control group; CHO = carbohydrate; D = diet; DXA = Dual-energy X-ray absorption; E = exercise; FBBT = family-based behavioural treatment; F = female; FU = follow up; GI = glycaemic index; GT = group therapy; HGI = high glycaemic index; hr = hour; HZ = heterozygous; HO = homozygous; ht = height; I = intervention; IG= intervention group; IOTF = International Obesity Task Force; Inpt. = inpatient; LGI = low glycaemic index; LMS = least-mean-squares; LS = long stay; min= minute; mth = month; MO = morbidly obese; norm. normal; n = number; NAFLD = Non-alcoholic fatty liver disease; ND = not described; NR = not reported; OB = obese; OC = obese control; OW = overweight; paed. = paediatric; PA = physical activity; PE = physical activity; PROT = protein; RCT = randomised controlled trial; SD = standard deviation; SDS = standard deviation score; SMP = structured meal plan; SS = short stay; Sub. = substantial; SMC = structured modified carbohydrate diet; trad. = traditional; Trad. act = traditional activity; tx = treatment; wk = week; WList OC = wait list obese control; WL = weight loss; wt = weight; X-over = crossover; yr = year

\*studies with change in % body fat included in the analysis

\*\*minor discrepancies in reporting of data in papers

**FOOTNOTE:** For studies reported in multiple publications, the reference that provided the most comprehensive information has been used (*thus Ning et al 2014<sup>36</sup> includes data from Bean et al 2011<sup>57</sup>; Evans et al 2009<sup>78</sup> is reported under Wickham et al 2009<sup>77</sup>, Aeberli et al 2010<sup>54</sup> is reported under Murer et al 2011<sup>53</sup>; Rendo-Urtega et al 2015<sup>52</sup> is reported under Morell-Azanza et al<sup>51</sup> and Kazankov et al 2014<sup>44</sup> is reported under Grønbaek et al 2012<sup>43</sup>).*



1  
2  
3 *Narrative description of studies that reported BMI-SDS and percentage body fat*  
4

5 Of the 39 studies that reported percentage body fat included in our analysis, seven were  
6 conducted in both Germany and USA, four in Italy, followed by Australia (n=2), Denmark (n=2),  
7 Netherlands (n=2), Poland (n=2), Switzerland (n=2), Tunisia (n=2) and one each in Belgium,  
8 Brazil, Canada, Chile, France, Portugal, Spain, Thailand and the UK. There were country-  
9 specific variations in the definition of obesity, with most studies defining obesity by participants  
10 having a BMI-SDS > 2, or a BMI percentile of at least > 90th percentile. Most of studies utilised  
11 a cohort design (n = 27), 11 were RCTs, of which one included results from a cohort of the  
12 original RCT. There was also one study which adopted a quasi-randomised design.  
13  
14  
15  
16  
17  
18  
19  
20  
21  
22  
23  
24  
25

26 Most studies (n=20) conducted their intervention in the hospital clinic setting. Eight studies  
27 conducted the intervention in the community setting and ten in academic institutions. One  
28 conducted the intervention in a mixed setting, reporting use of both a community setting and  
29 academic institution.  
30  
31  
32  
33  
34  
35  
36  
37

38 Twenty-eight studies conducted interventions that comprised both diet and exercise components.  
39 The remaining studies (n=11) utilised interventions that focused either on exercise or diet only.  
40 The duration of the interventions ranged from 15 days to 24 months. The majority of studies  
41 (n=29; 74%) did not report any follow-up after the lifestyle treatment intervention. The duration  
42 of follow-up in the studies where it was conducted and reported, ranged from 6 months to 2  
43 years.  
44  
45  
46  
47  
48  
49  
50  
51  
52  
53

54 The sample sizes of the included studies ranged from 8 to 203 participants. The age of the  
55 participants ranged from 4 to 19 years. Studies predominantly had a mix of males and females  
56 (95%) with only three studies specifically focused on either only girls<sup>59,60</sup> or boys<sup>72</sup>. Seventeen  
57  
58  
59  
60

1  
2  
3 studies (44%) measured pubertal development of participants according to Marshall and Tanner  
4 staging, with pubertal status categorised into three groups: prepubertal, pubertal, and late/post-  
5 pubertal<sup>79</sup>. Four studies (10%) reported that pubertal development was measured but the  
6 methodology was not defined. Eighteen studies (46%) did not report any measures of pubertal  
7 development.  
8  
9  
10  
11  
12  
13  
14  
15  
16

### 17 *Quality Assessment*

18  
19 The quality of the conduct of each study was assessed using the same criteria as the HTA  
20 systematic review of the long-term effects and economic consequences of treatments for obesity  
21 and implications for health improvement<sup>30</sup>. The results of the quality assessment can be found in  
22 Table 2. In summary, none of the 39 studies that reported percentage body fat were considered  
23 to be of poor quality, 21 studies (54%) were rated as being of moderate quality and 18 studies  
24 (46%) achieved a score over 81% indicating high quality.  
25  
26  
27  
28  
29  
30  
31  
32  
33  
34  
35  
36  
37  
38  
39  
40  
41  
42  
43  
44  
45  
46  
47  
48  
49  
50  
51  
52  
53  
54  
55  
56  
57  
58  
59  
60

Table 2: Quality Assessment of included studies

1  
2  
3  
4  
5  
6  
7  
8  
9  
10  
11  
12  
13  
14  
15  
16  
17  
18  
19  
20  
21  
22  
23  
24  
25  
26  
27  
28  
29  
30  
31  
32  
33  
34  
35  
36  
37  
38  
39  
40  
41  
42  
43  
44  
45  
46

|    |                                                           | SAMPLE                 |                          |                               |                                          |                                                  |                                   | CONDUCT OF STUDY                                   |                                |                                     |                                                 | FOLLOW-UP                  |                              |                                      | ANALYSIS                                 |                        |                                             |                                            | INTERPRETATION                                     |                                              |                                       |              |                |
|----|-----------------------------------------------------------|------------------------|--------------------------|-------------------------------|------------------------------------------|--------------------------------------------------|-----------------------------------|----------------------------------------------------|--------------------------------|-------------------------------------|-------------------------------------------------|----------------------------|------------------------------|--------------------------------------|------------------------------------------|------------------------|---------------------------------------------|--------------------------------------------|----------------------------------------------------|----------------------------------------------|---------------------------------------|--------------|----------------|
|    | Author, Year,                                             | 1. Aims clearly stated | 2. sample size justified | 3. Age of participant defined | 4. Measurements at start clearly stated? | 5. Measurements likely to be valid and reliable? | 6. Risk factors recorded clearly? | 7. Was the intervention before follow -up defined? | 8. Setting of the study clear? | 9. Is mode of assessment described? | 10. Did untoward events occur during the study? | 11. Was there a follow up? | 12. Was follow up necessary? | 13. Are losses to follow up defined? | 14. Was basic data adequately described? | 15. Do numbers add up? | 16. Did analysis allow for passage of time? | 17. Was statistical significance assessed? | 18. Were the main findings interpreted adequately? | 19. Were null/negative findings interpreted? | 20. Are important effects overlooked? | Total (x/40) | Overall rating |
| 1  | Bell 2007 <sup>32</sup>                                   | Yes                    | Yes                      | Yes                           | Yes                                      | Yes                                              | No                                | Yes                                                | ?                              | Yes                                 | No                                              | No                         | Yes                          | Yes                                  | Yes                                      | Yes                    | Yes                                         | Yes                                        | Yes                                                | Yes                                          | No                                    | 35           | 87.5           |
| 2  | Bock 2014 <sup>33</sup>                                   | Yes                    | No                       | Yes                           | Yes                                      | Yes                                              | No                                | Yes                                                | Yes                            | Yes                                 | No                                              | Yes                        | Yes                          | Yes                                  | Yes                                      | Yes                    | Yes                                         | Yes                                        | Yes                                                | Yes                                          | No                                    | 36           | 90             |
| 3  | Bruyndonckz 2015 <sup>34</sup>                            | Yes                    | No                       | Yes                           | Yes                                      | Yes                                              | No                                | Yes                                                | Yes                            | Yes                                 | No                                              | Yes                        | Yes                          | Yes                                  | Yes                                      | Yes                    | Yes                                         | Yes                                        | Yes                                                | Yes                                          | No                                    | 36           | 90             |
| 4  | Bustos 2015 <sup>35</sup>                                 | Yes                    | No                       | Yes                           | Yes                                      | Yes                                              | No                                | Yes                                                | Yes                            | Yes                                 | No                                              | No                         | Yes                          | No                                   | Yes                                      | Yes                    | Yes                                         | Yes                                        | Yes                                                | No                                           | No                                    | 30           | 75             |
| 5  | Calcaterra 2013 <sup>36</sup>                             | Yes                    | No                       | Yes                           | Yes                                      | Yes                                              | No                                | Yes                                                | Yes                            | Yes                                 | No                                              | No                         | Yes                          | No                                   | Yes                                      | Yes                    | Yes                                         | Yes                                        | Yes                                                | ?                                            | No                                    | 31           | 77.5           |
| 6  | Dobe 2011 <sup>37</sup>                                   | ?                      | No                       | Yes                           | ?                                        | ?                                                | No                                | Yes                                                | ?                              | ?                                   | No                                              | No                         | Yes                          | No                                   | Yes                                      | Yes                    | Yes                                         | Yes                                        | Yes                                                | ?                                            | No                                    | 26           | 65             |
| 7  | Farpour-Lambert, 2009 <sup>38</sup>                       | Yes                    | Yes                      | Yes                           | Yes                                      | Yes                                              | No                                | Yes                                                | ?                              | Yes                                 | No                                              | Yes                        | Yes                          | Yes                                  | Yes                                      | Yes                    | Yes                                         | Yes                                        | Yes                                                | Yes                                          | No                                    | 37           | 92.5           |
| 8  | Ford, 2010a <sup>39</sup> , 2010b <sup>40</sup>           | Yes                    | Yes                      | Yes                           | Yes                                      | Yes                                              | No                                | Yes                                                | Yes                            | Yes                                 | ?                                               | Yes                        | Yes                          | Yes                                  | Yes                                      | Yes                    | Yes                                         | Yes                                        | Yes                                                | Yes                                          | ?                                     | 35           | 87.5           |
| 9  | Gajewska, 2016 <sup>41</sup>                              | Yes                    | No                       | Yes                           | Yes                                      | Yes                                              | No                                | Yes                                                | Yes                            | Yes                                 | No                                              | No                         | Yes                          | No                                   | Yes                                      | Yes                    | Yes                                         | Yes                                        | Yes                                                | ?                                            | No                                    | 31           | 77.5           |
| 10 | Garanty-bogacka, 2011 <sup>42</sup>                       | Yes                    | No                       | Yes                           | Yes                                      | Yes                                              | ?                                 | ?                                                  | ?                              | Yes                                 | ?                                               | No                         | ?                            | No                                   | Yes                                      | ?                      | Yes                                         | Yes                                        | Yes                                                | ?                                            | No                                    | 26           | 65             |
| 11 | Gronbaek 2012 <sup>43</sup> , Kazankov 2014 <sup>44</sup> | Yes                    | ?                        | Yes                           | Yes                                      | Yes                                              | No                                | Yes                                                | Yes                            | Yes                                 | No                                              | Yes                        | Yes                          | Yes                                  | Yes                                      | Yes                    | Yes                                         | Yes                                        | Yes                                                | Yes                                          | No                                    | 37           | 92.5           |
| 12 | Hvidt 2014 <sup>45</sup>                                  | Yes                    | No                       | Yes                           | Yes                                      | Yes                                              | No                                | Yes                                                | Yes                            | Yes                                 | No                                              | Yes                        | Yes                          | Yes                                  | Yes                                      | Yes                    | Yes                                         | Yes                                        | Yes                                                | Yes                                          | ?                                     | 34           | 85             |
| 13 | Kirk 2005 <sup>46</sup>                                   | Yes                    | No                       | Yes                           | Yes                                      | Yes                                              | No                                | Yes                                                | Yes                            | Yes                                 | ?                                               | No                         | Yes                          | ?                                    | Yes                                      | Yes                    | Yes                                         | Yes                                        | Yes                                                | ?                                            | ?                                     | 29           | 72.5           |
| 14 | Klijjn 2007 <sup>47</sup>                                 | Yes                    | No                       | Yes                           | Yes                                      | Yes                                              | No                                | Yes                                                | ?                              | Yes                                 | No                                              | No                         | Yes                          | No                                   | No                                       | Yes                    | Yes                                         | Yes                                        | Yes                                                | No                                           | No                                    | 27           | 67.5           |
| 15 | Lazzer 2008 <sup>48</sup>                                 | Yes                    | No                       | Yes                           | Yes                                      | Yes                                              | No                                | Yes                                                | Yes                            | Yes                                 | No                                              | Yes                        | Yes                          | No                                   | Yes                                      | Yes                    | Yes                                         | Yes                                        | Yes                                                | No                                           | No                                    | 32           | 80             |
| 16 | Meyer 2006 <sup>49</sup>                                  | Yes                    | No                       | Yes                           | Yes                                      | Yes                                              | No                                | No                                                 | Yes                            | Yes                                 | No                                              | No                         | Yes                          | No                                   | Yes                                      | Yes                    | Yes                                         | Yes                                        | Yes                                                | Yes                                          | No                                    | 30           | 75             |
| 17 | Miraglia 2015 <sup>50</sup>                               | Yes                    | No                       | No                            | Yes                                      | Yes                                              | No                                | Yes                                                | ?                              | Yes                                 | No                                              | No                         | Yes                          | No                                   | ?                                        | Yes                    | Yes                                         | Yes                                        | ?                                                  | Yes                                          | Yes                                   | 25           | 62.5           |

1  
2  
3  
4  
5  
6  
7  
8  
9  
10  
11  
12  
13  
14  
15  
16  
17  
18  
19  
20  
21  
22  
23  
24  
25  
26  
27  
28  
29  
30  
31

|    |                                                                     |     |     |     |     |     |    |     |     |     |    |     |     |     |     |     |     |     |     |     |     |    |      |
|----|---------------------------------------------------------------------|-----|-----|-----|-----|-----|----|-----|-----|-----|----|-----|-----|-----|-----|-----|-----|-----|-----|-----|-----|----|------|
| 18 | Morell-Azanza 2016 <sup>51</sup> ; Rendo-Urteaga 2015 <sup>52</sup> | Yes | Yes | Yes | Yes | Yes | No | Yes | Yes | Yes | No | Yes | Yes | No  | Yes | Yes | Yes | Yes | Yes | No  | No  | 32 | 80   |
| 19 | Murer 2011 <sup>53</sup> ; Aeberli 2010 <sup>54</sup>               | Yes | Yes | Yes | Yes | Yes | No | Yes | Yes | Yes | No | Yes | Yes | Yes | Yes | Yes | Yes | Yes | Yes | Yes | No  | 38 | 92   |
| 20 | Murdolo 2017 <sup>55</sup>                                          | Yes | No  | Yes | Yes | Yes | No | No  | No  | Yes | No | Yes | Yes | No  | Yes | Yes | Yes | Yes | Yes | No  | No  | 28 | 70   |
| 21 | Ning 2014 <sup>56</sup> ; Bean 2011 <sup>57</sup>                   | Yes | No  | Yes | Yes | Yes | No | Yes | Yes | Yes | No | Yes | Yes | Yes | Yes | Yes | Yes | Yes | Yes | No  | No  | 34 | 85   |
| 22 | Pacifico 2013 <sup>58</sup>                                         | Yes | No  | Yes | Yes | Yes | No | Yes | Yes | Yes | No | Yes | Yes | No  | Yes | Yes | Yes | Yes | Yes | No  | ?   | 31 | 77.5 |
| 23 | Racil 2013 <sup>59</sup>                                            | Yes | No  | Yes | Yes | Yes | No | Yes | ?   | Yes | No | No  | ?   | No  | Yes | Yes | Yes | Yes | Yes | Yes | ?   | 29 | 72.5 |
| 24 | Racil 2016 <sup>60</sup>                                            | Yes | No  | ?   | Yes | Yes | No | Yes | ?   | Yes | No | No  | Yes | No  | Yes | Yes | Yes | Yes | Yes | No  | No  | 28 | 70   |
| 25 | Reinehr 2004a <sup>61</sup>                                         | Yes | No  | Yes | Yes | Yes | No | Yes | Yes | Yes | No | No  | Yes | No  | Yes | Yes | Yes | Yes | Yes | No  | ?   | 29 | 72.5 |
| 26 | Reinehr 2008a <sup>62</sup> , 2008b <sup>63</sup>                   | Yes | No  | Yes | Yes | Yes | No | Yes | Yes | Yes | No | Yes | Yes | No  | Yes | Yes | Yes | Yes | Yes | Yes | No  | 32 | 80   |
| 27 | Rohrer 2008 <sup>64</sup>                                           | Yes | No  | Yes | Yes | Yes | No | Yes | Yes | Yes | No | Yes | Yes | No  | Yes | Yes | Yes | Yes | Yes | ?   | No  | 33 | 82.5 |
| 28 | Rolland-Cachera 2004 <sup>65</sup>                                  | Yes | No  | Yes | Yes | Yes | No | Yes | Yes | Yes | No | Yes | Yes | Yes | ?   | Yes | Yes | Yes | Yes | No  | No  | 33 | 82.5 |
| 29 | Roth 2016 <sup>66</sup>                                             | Yes | No  | Yes | Yes | Yes | No | Yes | No  | Yes | No | No  | Yes | No  | Yes | Yes | Yes | Yes | Yes | No  | No  | 28 | 70   |
| 30 | Savoye 2005 <sup>67</sup>                                           | Yes | No  | Yes | Yes | Yes | No | Yes | Yes | Yes | No | Yes | Yes | Yes | Yes | Yes | Yes | Yes | Yes | No  | No  | 34 | 85   |
| 31 | Savoye 2007 <sup>68</sup> , 2011 <sup>69</sup>                      | Yes | Yes | Yes | Yes | Yes | No | Yes | Yes | Yes | No | Yes | Yes | Yes | Yes | Yes | Yes | Yes | Yes | No  | No  | 36 | 90   |
| 32 | Savoye 2014 <sup>70</sup>                                           | Yes | Yes | Yes | Yes | Yes | No | Yes | ?   | Yes | No | No  | Yes | Yes | Yes | Yes | Yes | Yes | Yes | Yes | No  | 35 | 87.5 |
| 33 | Schiel 2016 <sup>71</sup>                                           | Yes | No  | ?   | Yes | Yes | No | Yes | Yes | Yes | No | Yes | Yes | Yes | Yes | Yes | ?   | Yes | No  | ?   | Yes | 29 | 72.5 |
| 34 | Seabra 2016 <sup>72</sup>                                           | Yes | Yes | Yes | Yes | Yes | No | Yes | Yes | Yes | No | No  | Yes | Yes | Yes | Yes | Yes | Yes | Yes | No  | No  | 34 | 85   |
| 35 | Truby 2016 <sup>73</sup>                                            | Yes | Yes | Yes | Yes | Yes | No | Yes | Yes | Yes | No | Yes | Yes | Yes | Yes | Yes | Yes | Yes | Yes | Yes | No  | 38 | 95   |
| 36 | Van der Baan-Slootweg 2014 <sup>74</sup>                            | Yes | Yes | Yes | Yes | Yes | No | Yes | Yes | Yes | No | Yes | Yes | Yes | Yes | Yes | Yes | Yes | Yes | No  | No  | 36 | 90   |
| 37 | Visuthranukul 2015 <sup>75</sup>                                    | Yes | Yes | Yes | Yes | Yes | No | Yes | Yes | Yes | No | Yes | Yes | Yes | Yes | Yes | Yes | Yes | Yes | Yes | No  | 38 | 95   |
| 38 | Vitola 2009 <sup>76</sup>                                           | Yes | No  | Yes | Yes | Yes | No | ?   | ?   | Yes | No | No  | Yes | No  | Yes | Yes | Yes | Yes | Yes | No  | No  | 28 | 70   |
| 39 | Wickham 2009 <sup>77</sup> ; Evans 2009 <sup>78</sup>               | Yes | No  | Yes | Yes | Yes | No | Yes | Yes | Yes | No | Yes | Yes | ?   | Yes | Yes | Yes | Yes | No  | Yes | ?   | 30 | 75   |

**DECISION KEY:**

? = Unclear  
 For Q6. Were risk factors clearly recorded? We said “No” rather than “unclear” to all the studies that didn’t record risk factors;  
 For Q10. Did untoward events occur during the study? We said “No” rather than unclear if not mentioned.  
**Rating:** Not satisfactory 1-50%; Moderate quality = 51-80%; High quality = 81%

43  
44  
45  
46

### *Quantitative Analysis*

From the 39 studies we identified all data subsets that reported a mean change in BMI-SDS, an associated mean change in percentage body fat (or pre- and post- study values from which these could be calculated) and the number of cases analysed. A few studies yielded only aggregated data for the whole study. For the others, typical data subsets included intervention vs control, male vs female or good vs poor responders (see Table 1), and these were used in preference to aggregated results if both were available. In all, there were 66 subsets, with numbers analysed totalling 2,618.

SEs were required for the mean changes in percentage body fat and, if not given explicitly, were calculated, from either the standard deviations (SDs) or the 95% confidence intervals (CIs) of the mean changes. In total, 22 data sets had SEs. For the remainder, the SEs were estimated from the SDs associated with the baseline and the post-intervention percentage body fat values, making an assumption about the degree of correlation between them. The median and interquartile range (IQR) of the correlation coefficients estimated from the 9 data sets where both the SEs of mean change and the SDs for baseline and post intervention percentage body fat values were available was 0.81 (IQR 0.59-0.82) and 0.81 has been used in the following analysis. A small number of data sets (n=6)<sup>34,41,61</sup> only had medians and IQRs (or range) reported for the baseline and post intervention results; the mean and SDs were estimated from them<sup>80</sup>.

The meta-regression line was fitted and plotted together with the 95% prediction intervals for the change in percentage body fat across the study data sets. The smallest reduction of mean BMI-SDS associated with a reduction in mean percentage body fat was determined as the smallest reduction in mean BMI-SDS with an associated 95% prediction interval wholly below zero.

1  
2  
3 A series of sensitivity analyses were conducted. Sensitivity Analysis 5i: using the 22 cases where  
4 the SEs of the mean change in percentage body fat were actually known, Sensitivity Analysis  
5 5ii: omission of 2 extreme values and Sensitivity Analysis 5iii: assuming a correlation of 0.50  
6 instead of 0.81. In further exploratory analyses, the percentage of girls and the length of the study  
7 (baseline to end of intervention) were added to see if these affected the prediction of mean  
8 change in percentage body fat.  
9  
10  
11  
12  
13  
14  
15  
16  
17  
18

### 19 **Results from the quantitative analysis**

20  
21 Figure 3 shows the results of the analysis and the fitted regression line. The circles represent the  
22 study results (i.e. the mean changes in percentage body fat and mean changes in BMI-SDS)  
23 analysed for each study, with the size of the circles representing the precision of the mean change  
24 in percentage body fat, i.e. the reciprocal of the SE squared.  
25  
26  
27  
28  
29  
30  
31  
32

#### 33 ***Figure 3: Meta-regression line showing the relationship between mean change in percentage 34 Body Fat and BMI-SDS across the 39 studies (66 subsets) analysed***

35  
36  
37  
38 The fitted regression line shown in Figure 3 is:

39  
40  
41 Mean change in percentage body fat = 5.179 x Mean change in BMI-SDS - 0.767.  
42  
43  
44

45 The regression slope was statistically significant ( $P < 0.001$ ), confirming a relationship between  
46 the mean loss of percentage body fat and the mean change in BMI-SDS across the data subsets;  
47 the proportion of the between-subset variance explained by the mean change in BMI-SDS (i.e.  
48 ‘a type of adjusted R-squared’) was 68%. There was, however, significant between-subset  
49 heterogeneity with 89% of the percentage of the total residual variance attributable to this, (i.e.  
50  $I^2$ ). It was further noted that when added to the model, neither the percentage girls in the study  
51  
52  
53  
54  
55  
56  
57  
58  
59  
60

1  
2  
3 sets nor the durations of the interventions significantly improved the prediction of mean change  
4 in percentage body fat from the mean change in BMI-SDS (P=0.36, P=0.89 respectively).  
5  
6  
7  
8  
9

10 Figure 3 also shows the 95% prediction intervals for the mean change in percentage body fat.  
11 The upper limit of the prediction interval was below 0 only when the mean reduction in BMI-  
12 SDS was greater than 0.6, suggesting that any new study should aim to reduce the BMI-SDS by  
13 at least this amount to be confident of achieving a mean reduction of percentage body fat.  
14  
15  
16  
17  
18  
19

20 A normal plot for the standardised predicted random effects is shown in Figure 4. Most were  
21 within +/-2 although the data sets themselves were not wholly independent (as some came from  
22 the same studies).  
23  
24  
25  
26  
27  
28  
29

30 ***Figure 4: Normal plot for the standardised predicted random effects from the meta-***  
31 ***regression***  
32  
33

34 None of the sensitivity analyses conducted (Figure 5) significantly altered the findings, namely  
35 that a mean change of 0.6 or more in BMI-SDS was associated with a definitive mean loss in  
36 percentage body fat. In Figure 5(ii), with the exclusion of the two extreme data points, the linear  
37 trend can be seen more clearly across the range of mean BMI-SDS losses.  
38  
39  
40  
41  
42  
43  
44  
45

46 ***Figure 5: Sensitivity analysis***  
47  
48  
49  
50  
51  
52  
53  
54  
55  
56  
57  
58  
59  
60

## DISCUSSION

### Summary of main results

This is the first of a series of papers that report on studies identified in a large systematic review. The objective of this paper was to attempt to establish the minimum change in BMI-SDS needed to achieve improvements in body fat in obese children and adolescents; BMI-SDS being by far the most frequently reported outcome in terms of weight management trial interventions in childhood. Seventy-three of the 90 included studies reported adiposity measures, but in our meta-regression only percentage body fat can be used as a reliable, comparable marker of change of adiposity. Thus, the analyses presented in this paper were conducted using data from 39 studies. All of the included studies were considered to be of moderate to high quality according to the HTA quality assessment tool<sup>30</sup>. Despite there being a positive relationship between mean change in percentage body fat and mean change in BMI-SDS, our modelling suggested that, in order to be confident of effecting a mean loss in percentage body fat, any future study should aim to reduce the BMI-SDS by at least 0.6.

### Strengths and limitations

We believe that this is the first paper to attempt to bring together all studies that have reported both a change in BMI-SDS and changes in a marker of adiposity in the obese paediatric population. The systematic methods employed to identify the included studies were stringent, but it is possible that some relevant studies might have been missed. In addition, there was some variation in the reporting of results where there were multiple publications of the same study; in these cases, the results from the most comprehensive paper have been used. An important limitation to address in the broader context going forward, is whether BMI-SDS is the best way to represent changes in BMI at extremes of body weight. The US Center for



1  
2  
3 Disease Control cautioned the use of BMI-SDS in weight extremes in 2009<sup>81</sup>. Freedman *et al*  
4 have suggested that there are better measures of adiposity in severe obesity, such as percentage  
5 of 95<sup>th</sup> percentile BMI (%BMI<sup>p95</sup>) or distance in Kg/m<sup>2</sup> from the 95<sup>th</sup> percentile ( $\Delta$  BMI<sup>p95</sup>)<sup>82</sup>.  
6  
7 Other groups have identified alternate methods when dealing with extremes of obesity such as  
8 BMI%<sup>83</sup> or percentage above IOTF-25<sup>84</sup>. Vanderwell *et al* have also suggested that BMI-SDS  
9 is only a weak to moderate predictor of percentage body fat in children especially under 9 years  
10 of age<sup>85</sup>. Notwithstanding these cautions, we based this analysis on the data available to us  
11 which was almost entirely reported in terms of BMI-SDS and continues to be the case in most  
12 recent publications to date.  
13  
14  
15  
16  
17  
18  
19  
20  
21  
22  
23  
24  
25  
26

27 It has been suggested that the relationship between change in percentage body fat and change  
28 in BMI-SDS may differ between very young and older children<sup>86</sup>. Our inclusion criteria  
29 stipulated ages from 4 to 19 years. Most of the studies spanned a wide range of ages (see Table  
30 1) and we did not have access to individual child data to facilitate stratification by age. Data  
31 from four subsets of children up to 10 years<sup>37,41,46</sup>, however, did not suggest a different  
32 relationship from the whole cohort (Appendix 3).  
33  
34  
35  
36  
37  
38  
39  
40  
41  
42  
43  
44

#### 45 **Agreements and disagreements with other research**

46  
47 Previous research has shown that an improvement in body composition and cardiometabolic  
48 risk can be achieved with a BMI-SDS reduction of greater than or equal to 0.25 in obese  
49 adolescents, with greater benefits achieved when losing at least 0.5 BMI-SDS<sup>39</sup>.  
50  
51

52 In clinical practice, the degree of weight loss with lifestyle intervention is moderate and the  
53 success rate 2 years after onset of an intervention is low (<20% with a decrease in BMI-SDS  
54 <0.25)<sup>87</sup>. There have been numerous reports of lifestyle-based weight management  
55  
56  
57  
58  
59  
60

1  
2  
3 interventions for obese children, many documenting changes in BMI-SDS, but a recent meta-  
4 analysis has documented that whilst such changes may be statistically significant, they are  
5 unlikely to lead to clinical improvements in metabolic health<sup>88,89</sup>. To our knowledge this is the  
6 first paper to establish the minimum change in BMI-SDS required to be certain of improving  
7 adiposity as percentage body fat for obese children and adolescents in clinical trials.  
8  
9  
10  
11  
12  
13  
14  
15  
16  
17

### 18 **Clinical implications**

19  
20  
21 If reducing fat mass is the aim of weight management interventions, our analysis in this review  
22 demonstrates that BMI-SDS changes must be of an order seldom achieved in trials worldwide.  
23 From our model, to be confident about ensuring an improvement in mean body fat, one should  
24 aim to reduce mean BMI-SDS by at least 0.6. Figure 3 and Sensitivity Analysis 5ii (Figure 5)  
25 suggest that to reduce body fat by 5% requires a much larger BMI-SDS reduction, of the order  
26 of 1.3 to 1.5, although there was a paucity of data in this region.  
27  
28  
29  
30  
31  
32  
33  
34  
35  
36  
37  
38

### 39 **Recommendations for future research**

40  
41 Whilst we are undertaking further analyses looking at key cardiovascular and metabolic  
42 outcomes in childhood obesity that may demonstrate improvements at lesser levels of BMI-  
43 SDS reduction, the evidence suggests that very few childhood weight management trials to  
44 date are likely to have improved percentage body fat and calls in to question their overall  
45 efficacy in terms of health improvement. That said, any trial demonstrating an improvement of  
46 the magnitude of 0.6 BMI-SDS might be termed successful with a likely reduction in fat mass.  
47 However, given the mounting evidence that BMI-SDS may not accurately reflect adiposity at  
48 extremes of obesity, it seems prudent for future trials to report additional indices of derived  
49 BMI values which may better reflect changes in actual adiposity. Which of the many measures  
50  
51  
52  
53  
54  
55  
56  
57  
58  
59  
60

1  
2  
3 suggested eventually establishes itself as the ‘optimal’ determinant at extremes of body mass  
4  
5 is yet to be determined?  
6  
7  
8  
9

## 10 11 **Conclusions**

12  
13  
14 Using our model, to predict any fat mass improvement when reporting a weight management  
15  
16 trial outcome requires a BMI-SDS decrease of 0.6. When evaluating key outcomes for future  
17  
18 weight management trials and services, this figure needs to be borne in mind by researchers,  
19  
20 health care professionals and commissioners when assessing apparent success.  
21  
22  
23  
24  
25  
26  
27  
28  
29

## 30 31 **Author Contributions**

32  
33 Ms Birch and Dr Perry provided substantial contributions to the conception and design of the  
34  
35 study, designed the data extraction instrument, performed electronic database searches, data  
36  
37 screening, extraction and quality assessment, coordinated and supervised data collection and  
38  
39 drafted and revised the manuscript.  
40  
41

42 Professor Hamilton-Shield provided a substantial contribution to the conception and design of  
43  
44 the study, conducted data screening and interpretation, and assisted with drafting and revision  
45  
46 of the manuscript.  
47  
48

49 Dr Hunt provided statistical expertise in relation to study design and conducted the data  
50  
51 analyses and contributed to the drafting and revision of the manuscript.  
52  
53

54 Mr Matson, Ms Chong and Ms Beynon were involved in data acquisition and management.

55  
56 All authors approved the final manuscript as submitted and agree to be accountable for all  
57  
58 aspects of the work.  
59  
60

1  
2  
3 ***Figure 1: Flow diagram from the systematic review that identified the included studies***  
4

5 ***Figure 2: Venn diagram illustrating the markers of metabolic health measured***  
6

7 ***Table 1: Characteristics of studies reporting adiposity outcomes with results of mean***  
8 ***change in BMI-SDS and percentage body fat***  
9

10 ***Table 2: Quality Assessment of included studies***  
11

12 ***Figure 3: Meta-regression line showing the relationship between mean change in***  
13 ***percentage Body Fat and BMI-SDS across the 39 studies (66 subsets) analysed***  
14

15 ***Figure 4: Normal plot for the standardised predicted random effects from the meta-***  
16 ***regression***  
17

18 ***Figure 5: Sensitivity Analyses***  
19  
20  
21  
22  
23  
24  
25  
26  
27  
28  
29  
30  
31  
32  
33  
34  
35  
36  
37  
38  
39  
40  
41  
42  
43  
44  
45  
46  
47  
48  
49  
50  
51  
52  
53  
54  
55  
56  
57  
58  
59  
60

## References

1. Organization, WHO, Report of the commission on ending childhood obesity. 2016: World Health Organization.
2. National Child Measurement Programme - England, 2017-18 [National Statistics]. In: National Child Measurement Programme data source: Health and Social Care Information Centre; 2018. Content.digital.nhs.uk. (n.d.). National Child Measurement Programme - NHS Digital. [online] Available at: <http://content.digital.nhs.uk/ncmp>.
3. National Child Measurement Programme - England, 2016-17 [National Statistics]. In: National Child Measurement Programme data source: Health and Social Care Information Centre; 2018. Content.digital.nhs.uk. (n.d.). National Child Measurement Programme - NHS Digital. [online] Available at: <http://content.digital.nhs.uk/ncmp>.
4. Simmonds M, Llewellyn A, Owen CG, Woolacott N. Predicting adult obesity from childhood obesity: a systematic review and meta-analysis. *Obesity Reviews*. 2016;17(2): 95-107
5. Hannon TS, Rao G, Arslanian SA. Childhood Obesity and Type 2 Diabetes Mellitus. *Pediatrics*. 2005;116(2):473-480
6. Haines L, Wan KC, Lynn R, Barrett TG, Shield JP. Rising Incidence of Type 2 Diabetes in Children in the U.K. *Diabetes Care*. 2007;30(5):1097-1101
7. Urbina EM, Kimball TR, McCoy CE, et al. Youth with Obesity and Obesity-Related Type 2 Diabetes Mellitus Demonstrate Abnormalities in Carotid Structure and Function. *Circulation*. 2009;119(22):2913-2919
8. Pires A, Martins P, Pereira AP, et al. Insulin Resistance, Dyslipidemia and Cardiovascular Changes in a Group of Obese Children. *Arquivos Brasileiros de Cardiologia*. 2015;104:266-273
9. Cook S, Kavey REW. Dyslipidemia and Pediatric Obesity. *Pediatric Clinics of North America* 2011;58(6):1363-1373
10. Chiarelli F, Marcovecchio ML. Insulin resistance and obesity in childhood. *European Journal of Endocrinology*. 2008;159(suppl 1): S67-S74
11. Tounian P, Aggoun Y, Dubern B, et al. Presence of increased stiffness of the common carotid artery and endothelial dysfunction in severely obese children: a prospective study. *The Lancet*. 2001;358(9291): 1400-1404
12. Klein S, Burke LE, Bray GA, et al. Clinical Implications of Obesity with Specific Focus on Cardiovascular Disease. A Statement for Professionals from the American Heart Association Council on Nutrition, Physical Activity, and Metabolism: Endorsed by the American College of Cardiology Foundation. *Circulation*. 2004;110(18):2952-2967

13. Krebs JD, Evans S, Cooney L, et al. Changes in risk factors for cardiovascular disease with body fat loss in obese women. *Diabetes, Obesity and Metabolism*. 2002;4(6):379-387
14. Goldstein DJ. Beneficial health effects of modest weight loss. *International journal of obesity and related metabolic disorders*. 1992;16(6):397-415
15. Colditz GA, Willett WC, Rotnitzky A, Manson JE. Weight gain as a risk factor for clinical diabetes mellitus in women. *Annals of Internal Medicine*. 1995;122(7):481-486
16. National Heart, Lung, and Blood Institute. "Clinical guidelines on the identification, evaluation, and treatment of overweight and obesity in adults. Bethesda (MD): National Heart, Lung, and Blood Institute; 1998
17. Cole TJ. The LMS method for constructing normalized growth standards. *European Journal of Clinical Nutrition*. 1990; 44:45–60
18. Ho M, Garnett SP, Baur L, et al. Effectiveness of Lifestyle Interventions in Child Obesity: Systematic Review with a Meta-analysis. *Pediatrics*. 2012;130(6): e1647-1671
19. Colquitt JL, Loveman E, O'Malley C, et al. Diet, physical activity, and behavioural interventions for the treatment of overweight or obesity in preschool children up to the age of 6 years. *Cochrane Database Syst Rev*, 2016. **3**: p. Cd012105
20. Oude Luttikhuis H, Baur L, Jansen H, et al., Cochrane review: Interventions for treating obesity in children. *Evidence-based child health: A Cochrane Review Journal*. 2009;4(4):1571-1729
21. National Institute for Health and Care Excellence. Quality Standard [QS94]. Obesity in children and young people: prevention and lifestyle weight management programmes. *NICE*. 2015; <https://www.nice.org.uk/guidance/qs94>
22. Friedemann C, Mahtani K, Thompson M, Perera R. Cardiovascular disease risk in healthy children and its association with body mass index: systematic review and meta-analysis. *British Medical Journal*. 2012; 345: e4759
23. Prentice AM, Jebb SA. Beyond body mass index. *Obesity Review*. 2001; 2(3):141-7
24. Cole TJ, Freeman JV, Preece MA. Body mass index reference curves for the UK, 1990. *Archives of Disease in Childhood*. 1995;73(1):25-29
25. Kuczmarski RJ, Ogden CL, Grummer-Strawn LM, et al. CDC growth charts: United States. *Advance Data*, 2000;(314):1-27
26. Cole TJ, Bellizzi MC, Flegal KM, Dietz WH. Establishing a standard definition for child overweight and obesity worldwide: international survey. *British Medical Journal*. 2000; 320(7244):1240

- 1
  - 2
  - 3
  - 4
  - 5
  - 6
  - 7
  - 8
  - 9
  - 10
  - 11
  - 12
  - 13
  - 14
  - 15
  - 16
  - 17
  - 18
  - 19
  - 20
  - 21
  - 22
  - 23
  - 24
  - 25
  - 26
  - 27
  - 28
  - 29
  - 30
  - 31
  - 32
  - 33
  - 34
  - 35
  - 36
  - 37
  - 38
  - 39
  - 40
  - 41
  - 42
  - 43
  - 44
  - 45
  - 46
  - 47
  - 48
  - 49
  - 50
  - 51
  - 52
  - 53
  - 54
  - 55
  - 56
  - 57
  - 58
  - 59
  - 60
27. De Onis M, Garza C, Onyango AW, Borghi E. Comparison of the WHO child growth standards and the CDC 2000 growth charts. *The Journal of Nutrition*. 2007;137(1):144-148
28. De Onis MD, Onyango AW, Borghi E, Siyam A, Nishida C, Siekmann J. Development of a WHO growth reference for school-aged children and adolescents. *Bulletin of the World Health Organization*. 2007b; 85(9):660-667
29. Higgins J, Green S. *Cochrane handbook for systematic reviews of interventions*. Chichester: Wiley; 2011
30. Avenell A, Broom J, Brown TJ. Systematic review of the long-term effects and economic consequences of treatments for obesity and implications for health improvement. *Health Technol. Assess*. 2004; 8(21):iii-iv:1-182.
31. Harbord RM, Higgins JPT. 'Meta-regression in Stata.' *The Stata Journal*. 2008;8(4):493-519
32. Bell L, Watts K, Siafarikas A, et al. Exercise alone reduces insulin resistance in obese children independently of changes in body composition. *Journal of Clinical Endocrinol. Metab*. 2007; 92(11):4230-4235
33. Bock DE, Watts K, Siafarikas A, et al. The Health Initiative Program for Kids (HIP Kids): effects of a 1-year multidisciplinary lifestyle intervention on adiposity and quality of life in obese children and adolescents - a longitudinal pilot intervention study. *BMC Pediatrics*. 2014; 14:296. doi: 10.1186/s12887-014-0296-1
34. Bruyndonckx L, Hoymans VY, De Guchteneere A, et al. Diet, exercise, and endothelial function in obese adolescents. *Pediatrics*. 2015;135(3): e653-e661
35. Bustos P, Orias J, Sáez K, Maldonado M, Cuadra L, Asenjo S. Effects of the Bright Bodies Program in Chilean obese children. *Revista Medica De Chile*. 2015;143(9):1136-1143
36. Calcaterra V, Larizza D, Codrons E, et al. Improved metabolic and cardiorespiratory fitness during a recreational training program in obese children. *Journal of Pediatric Endocrinology*. 2013; 26(3-4):271-276
37. Dobe M, Geisler A, Hoffmann D, et al. [The Obeldicks concept. An example for a successful outpatient lifestyle intervention for overweight or obese children and adolescents]. *Bundesgesundheitsblatt, Gesundheitsforschung, Gesundheitsschutz*. 2011; 54(5):628-635
38. Farpour-Lambert NJ, Aggoun Y, Marchand LM, Martin XE, Herrmann FR, Beghetti M. Physical activity reduces systemic blood pressure and improves early markers of atherosclerosis in pre-pubertal obese children. *Journal of the American College of Cardiology*. 2009; 54: 2396-406 DOI: 10.1016/j.jacc.2009.08.030



- 1
  - 2
  - 3
  - 4
  - 5
  - 6
  - 7
  - 8
  - 9
  - 10
  - 11
  - 12
  - 13
  - 14
  - 15
  - 16
  - 17
  - 18
  - 19
  - 20
  - 21
  - 22
  - 23
  - 24
  - 25
  - 26
  - 27
  - 28
  - 29
  - 30
  - 31
  - 32
  - 33
  - 34
  - 35
  - 36
  - 37
  - 38
  - 39
  - 40
  - 41
  - 42
  - 43
  - 44
  - 45
  - 46
  - 47
  - 48
  - 49
  - 50
  - 51
  - 52
  - 53
  - 54
  - 55
  - 56
  - 57
  - 58
  - 59
  - 60
39. Ford AL, Hunt LP, Cooper A, Shield JP. What reduction in BMI SDS is required in obese adolescents to improve body composition and cardiometabolic health? *Archives of Disease in Childhood*. 2010; 95:256-261. DOI: 10.1136/adc.2009.165340
40. Ford AL, Bergh C, Sabin MA, Hollinghurst S, Hunt LP, Shield JP. Treatment of childhood obesity by retraining eating behaviour: randomised controlled trial. *British Medical Journal*, 2010; 340: p. b5388
41. Gajewska J, Kuryłowicz A, Mierzejewska E, et al. Complementary Effects of Genetic Variations in LEPR on Body Composition and Soluble Leptin Receptor Concentration after 3-Month Lifestyle Intervention in Prepubertal Obese Children. *Nutrients*. 2016;8(6). pii: E328. doi: 10.3390/nu8060328
42. Garanty-Bogacka B, Syrenicz M, Goral J, et al. Changes in inflammatory biomarkers after successful lifestyle intervention in obese children. *Endokrynologia Polska*. 2011;62(6):499-505
43. Grønbaek H, Lange A, Birkebæk NH, et al. Effect of a 10-week weight loss camp on fatty liver disease and insulin sensitivity in obese Danish children. *Journal of Pediatric Gastroenterol.Nutr*. 2012; 54(2):223-228
44. Kazankov K, Møller HJ, Lange A, et al. The macrophage activation marker sCD163 is associated with changes in NAFLD and metabolic profile during lifestyle intervention in obese children. *Pediatric Obesity*. 2015;10(3):226-233
45. Hvidt KN, Olsen MH, Ibsen H, Holm JC. Effect of changes in BMI and waist circumference on ambulatory blood pressure in obese children and adolescents. *Journal of Hypertension*. 2014; 32(7):1470-1477
46. Kirk S, Zeller M, Claytor R, Santangelo M, Khoury PR, Daniels SR. The relationship of health outcomes to improvement in BMI in children and adolescents. *Obesity Research*. 2005; 13(5): 876-882
47. Klijin P, van der Baan-Slootweg O, van Stel HF. Aerobic exercise in adolescents with obesity: preliminary evaluation of a modular training program and the modified shuttle. *BMC Pediatrics*. 2007; 7(19): doi:10.1186/1471-2431-7-19
48. Lazzer S, Molin M, Stramare D, Facchini S, Francescato MP. Effects of an eight-month weight-control program on body composition and lipid oxidation rate during exercise in obese children. *Journal of Endocrinological Investigation*. 2008; 31(6): 509-514
49. Meyer AA, Kundt G, Lenschow U, Schuff-Werner P, Kienast W. Improvement of early vascular changes and cardiovascular risk factors in obese children after a six-month exercise program. *Journal of the American College of Cardiology*. 2006; 48(9):1865-1870
50. Miraglia F, de Moraes Silveira CR, Gomes Beghetto M, dos Santos Oliveira F, de Mello ED. Behavior of adipokines after a year follow-up in the Obesity Outpatient Clinic for Children and Adolescents. *Nutricion Hospitalaria*. 2015; 32(4):1554-1559



- 1  
2  
3 51. Morell-Azanza L, García-Calzón S, Rendo-Urteaga T, et al. Serum oxidized low-density  
4 lipoprotein levels are related to cardiometabolic risk and decreased after a weight loss  
5 treatment in obese children and adolescents. *Pediatric Diabetes*. 2017; 18: 392-398  
6  
7
- 8 52. Rendo-Urteaga T, García-Calzón S, González-Muniesa P, et al. Peripheral blood  
9 mononuclear cell gene expression profile in obese boys who followed a moderate energy-  
10 restricted diet: Differences between high and low responders at baseline and after the  
11 intervention. *British Journal of Nutrition*. 2015; 113(2): 331-342  
12  
13
- 14 53. Murer SB, Knöpfli BH, Aeberli I, et al. Baseline leptin and leptin reduction predict  
15 improvements in metabolic variables and long-term fat loss in obese children and  
16 adolescents: A prospective study of an inpatient weight-loss program. *American Journal of*  
17 *Clinical Nutrition*. 2011; 93(4): 695-702  
18  
19
- 20 54. Aeberli I, Jung A, Murer SB, et al. During rapid weight loss in obese children, reductions  
21 in TSH predict improvements in insulin sensitivity independent of changes in body weight  
22 or fat. *The Journal of clinical endocrinology and metabolism*. 2010; 95(12):5412-8  
23  
24
- 25 55. Murdolo G, Tortoioli C, Celi F, et al. Fetuin-A, adiposity-linked insulin resistance and  
26 responsiveness to an educational-based weight excess reduction program: a population-  
27 based survey in prepubertal schoolchildren. *Endocrine*. 2017; 56(2): 357-365  
28  
29
- 30 56. Ning Y, Yang S, Evans RK, et al. Changes in body anthropometry and composition in  
31 obese adolescents in a lifestyle intervention program. *European Journal of Nutrition*. 2014;  
32 53(4):1093-1102  
33  
34
- 35 57. Bean M, Mazzeo SE, Stern M, et al. Six-month dietary changes in ethnically diverse, obese  
36 adolescents participating in a multidisciplinary weight management program. *Clin Pediatr*.  
37 2011;50(5):408-416  
38  
39
- 40 58. Pacifico L, Arca M, Anania C, Cantisani V, Di Martino M, Chiesa C. Arterial function and  
41 structure after a 1-year lifestyle intervention in children with nonalcoholic fatty liver  
42 disease. *Nutrition, metabolism, and cardiovascular diseases*. 2013; 23(10):1010-6  
43  
44
- 45 59. Racil G, Ben Ounis O, Hammouda O, et al. Effects of high vs. moderate exercise intensity  
46 during interval training on lipids and adiponectin levels in obese young females. *European*  
47 *Journal of Applied Physiology*. 2013; 113(10):2531-40  
48  
49
- 50 60. Racil G, Coquart JB, Elmontassar W, et al. Greater effects of high- compared with  
51 moderate-intensity interval training on cardio-metabolic variables, blood leptin  
52 concentration and ratings of perceived exertion in obese adolescent females. *Biology of*  
53 *Sport*. 2016; 33(2): 145-152  
54  
55
- 56 61. Reinehr T, Roth C, Menke T, Andler W. Adiponectin before and after weight loss in obese  
57 children. *The Journal of Clinical Endocrinology and Metabolism*. 2004; 89(8): 3790-4  
58  
59
- 60 62. Reinehr T, Stoffel-Wagner B, Roth CL. Retinol-binding protein 4 and its relation to insulin  
resistance in obese children before and after weight loss. *The Journal of Clinical*  
*Endocrinology and Metabolism*. 2008; 93(6):2287-93

- 1  
2  
3 63. Reinehr T, Roth CL. Fetuin-A and its relation to metabolic syndrome and fatty liver disease  
4 in obese children before and after weight loss. *The Journal of Clinical Endocrinology and*  
5 *Metabolism*. 2008; 93(11):4479-85  
6  
7  
8 64. Rohrer TR, Rizzo F, Cäsar JJ, Muelbredt O, et al. Changes in Hepatic Risk Factors,  
9 Metabolic Variables, Body Composition, and Physical Fitness in Obese Children After a  
10 One-Year Weight Loss Program. *Journal of Pediatric Endocrinology & Metabolism*, 2008;  
11 21(9): 837-845  
12  
13 65. Rolland-Cachera MF, Thibault H, Souberbielle JC, et al. Massive obesity in adolescents:  
14 dietary interventions and behaviours associated with weight regain at 2 y follow-up.  
15 *International journal of obesity and related metabolic disorders*. 2004; 28(4):514-519  
16  
17  
18 66. Roth, CL, Elfers C, Lass N, Reinehr T. Betatrophin: No relation to glucose metabolism or  
19 weight status in obese children before and after lifestyle intervention. *Pediatric Diabetes*.  
20 2017; 18: 485-491  
21  
22  
23 67. Savoye M, Berry D, Dziura J, et al. Anthropometric and psychosocial changes in obese  
24 adolescents enrolled in a Weight Management Program. *Journal of the American Dietetic*  
25 *Association*. 2005; 105(3):364-370  
26  
27  
28 68. Savoye M, Nowicka P, Shaw M, et al. Long-term Results of an Obesity Program in an  
29 Ethnically Diverse Pediatric Population. *Pediatrics*. 2011; 127(3):402-410  
30  
31  
32 69. Savoye M, Shaw M, Dziura J, et al. Effects of a Weight Management Program on Body  
33 Composition and Metabolic Parameters in Overweight Children. *JAMA*. 2007;  
34 297(24):2697-2704  
35  
36  
37 70. Savoye M, Caprio S, Dziura J, et al. Reversal of early abnormalities in glucose metabolism  
38 in obese youth: Results of an intensive lifestyle randomized controlled trial. *Diabetes Care*.  
39 2014;37(2):317 – 324.  
40  
41  
42 71. Schiel R, Kaps A, Günter Stein G, Steveling A. Identification of Predictors for Weight  
43 Reduction in Children and Adolescents with Overweight and Obesity (IDA-Insel Survey).  
44 *Healthcare*. 2016; 4(1): 07. doi:10.3390/healthcare4010005  
45  
46  
47 72. Seabra A, Katzmarzyk P, Carvalho MJ, et al. Effects of 6-month soccer and traditional  
48 physical activity programmes on body composition, cardiometabolic risk factors,  
49 inflammatory, oxidative stress markers and cardiorespiratory fitness in obese boys. *Journal*  
50 *of Sports Sciences*. 2016; 34(19):1822-1829  
51  
52  
53 73. Truby H, Baxter K, Ware RS, et al. A Randomized Controlled Trial of Two Different  
54 Macronutrient Profiles on Weight, Body Composition and Metabolic Parameters in Obese  
55 Adolescents Seeking Weight Loss. *PLoS ONE [Electronic Resource]*. 2016; 11(3):  
56 e0151787  
57  
58  
59 74. van der Baan–Slootweg O, Benninga MA, Beelen A, van der Palen J, et al. Inpatient  
60 treatment of children and adolescents with severe obesity in the Netherlands. A  
Randomized Clinical Trial. *JAMA Pediatr*, 2014; 168(9):807-814.

- 1
  - 2
  - 3
  - 4
  - 5
  - 6
  - 7
  - 8
  - 9
  - 10
  - 11
  - 12
  - 13
  - 14
  - 15
  - 16
  - 17
  - 18
  - 19
  - 20
  - 21
  - 22
  - 23
  - 24
  - 25
  - 26
  - 27
  - 28
  - 29
  - 30
  - 31
  - 32
  - 33
  - 34
  - 35
  - 36
  - 37
  - 38
  - 39
  - 40
  - 41
  - 42
  - 43
  - 44
  - 45
  - 46
  - 47
  - 48
  - 49
  - 50
  - 51
  - 52
  - 53
  - 54
  - 55
  - 56
  - 57
  - 58
  - 59
  - 60
75. Visuthranukul C, Sirimongkol P, Prachansuwan A, Pruksananonda C, Chomtho S. Low-glycemic index diet may improve insulin sensitivity in obese children. *Pediatric Research*. 2015;78(5):567-573
76. Vitola BE, Deivanayagam S, Stein RI, et al. Weight loss reduces liver fat and improves hepatic and skeletal muscle insulin sensitivity in obese adolescents. *Obesity*. 2009; 17:1744-1748
77. Wickham EP, Stern M, Evans RK, et al. Prevalence of the Metabolic Syndrome Among Obese Adolescents Enrolled in a Multidisciplinary Weight Management Program: Clinical Correlates and Response to Treatment. *Metabolic Syndrome and Related Disorders*. 2009; 7(3):179-186
78. Evans RK, Franco RL, Stern M, et al. Evaluation of a 6-month multi-disciplinary healthy weight management program targeting urban, overweight adolescents: Effects on physical fitness, physical activity, and blood lipid profiles. *International Journal of Pediatric Obesity*. 2009; 4(3):130-133
79. Tanner JM. Growth at adolescence: with a general consideration of the effects of hereditary and environmental factors upon growth and maturation from birth to maturity. 2nd ed. Oxford, England: Blackwell Scientific, 1962
80. Wan X, Wang W, Liu J, Tong T. Estimating the sample size and standard deviation from the sample size, median, range and/or interquartile range. *BMC Medical Research Methodology*. 2014; 14:135 doi: 10.1186/1471-2288-14-135
81. Flegal, KM, et al. Characterizing extreme values of body mass index-for-age by using the 2000 Centers for Disease Control and Prevention growth charts. *Am J Clin Nutr*. 2009; 90(5): 1314-1320
82. Freedman DS, Butte NF, Tavares EM, Lundeen EA, Blanck, HM, Goodman AB, Ogden CL. BMI z-scores are a poor indicator of adiposity among 2- to 19-year -olds with very high BMIs, NHANES 1999-2000 to 2013-2014. *Obesity*, 2017; 25(4):739-746. doi:10.1002/oby.21782
83. Cole, TJ, et al. "What is the best measure of adiposity change in growing children: BMI, BMI %, BMI z-score or BMI centile?" *Eur J Clin Nutr*. 2005; 59(3): 419-425
84. Juliusson, PB, et al. Severe obesity is a limitation for the use of body mass index standard deviation scores in children and adolescents. *Acta Paediatr*. 2018; 107(2): 307-314
85. Vanderwall, C, et al. BMI is a poor predictor of adiposity in young overweight and obese children. *BMC Pediatr*. 2017; 17(1): 135
86. Woo JG, Cole TJ. Assessing adiposity using BMI-Z scores in children with severe obesity. *Obesity*, 2017; 25(4); 662
87. Reinehr T. Lifestyle intervention in childhood obesity: changes and challenges. *Nat Rev Endocrinol*. 2013; 9(10):607-614

- 1  
2  
3  
4  
5  
6  
7  
8  
9  
10  
11  
12  
13  
14  
15  
16  
17  
18  
19  
20  
21  
22  
23  
24  
25  
26  
27  
28  
29  
30  
31  
32  
33  
34  
35  
36  
37  
38  
39  
40  
41  
42  
43  
44  
45  
46  
47  
48  
49  
50  
51  
52  
53  
54  
55  
56  
57  
58  
59  
60
88. Al-Khudairy L, Loveman E, Colquitt JL, et al. Diet, physical activity and behavioural interventions for the treatment of overweight or obese adolescents aged 12 to 17 years. *Cochrane Database Syst Rev.* 2017 Jun 22;6:CD012691. doi: 10.1002/14651858.CD012691
89. Mead E, Brown T, Rees K, et al. Diet, physical activity and behavioural interventions for the treatment of overweight or obese children from the age of 6 to 11 years. *Cochrane Database Syst Rev.* 2017 Jun 22;6:CD012651. doi: 10.1002/14651858.CD012651

For peer review only

**Figure 1: Flow diagram from the systematic review that identified the included studies**

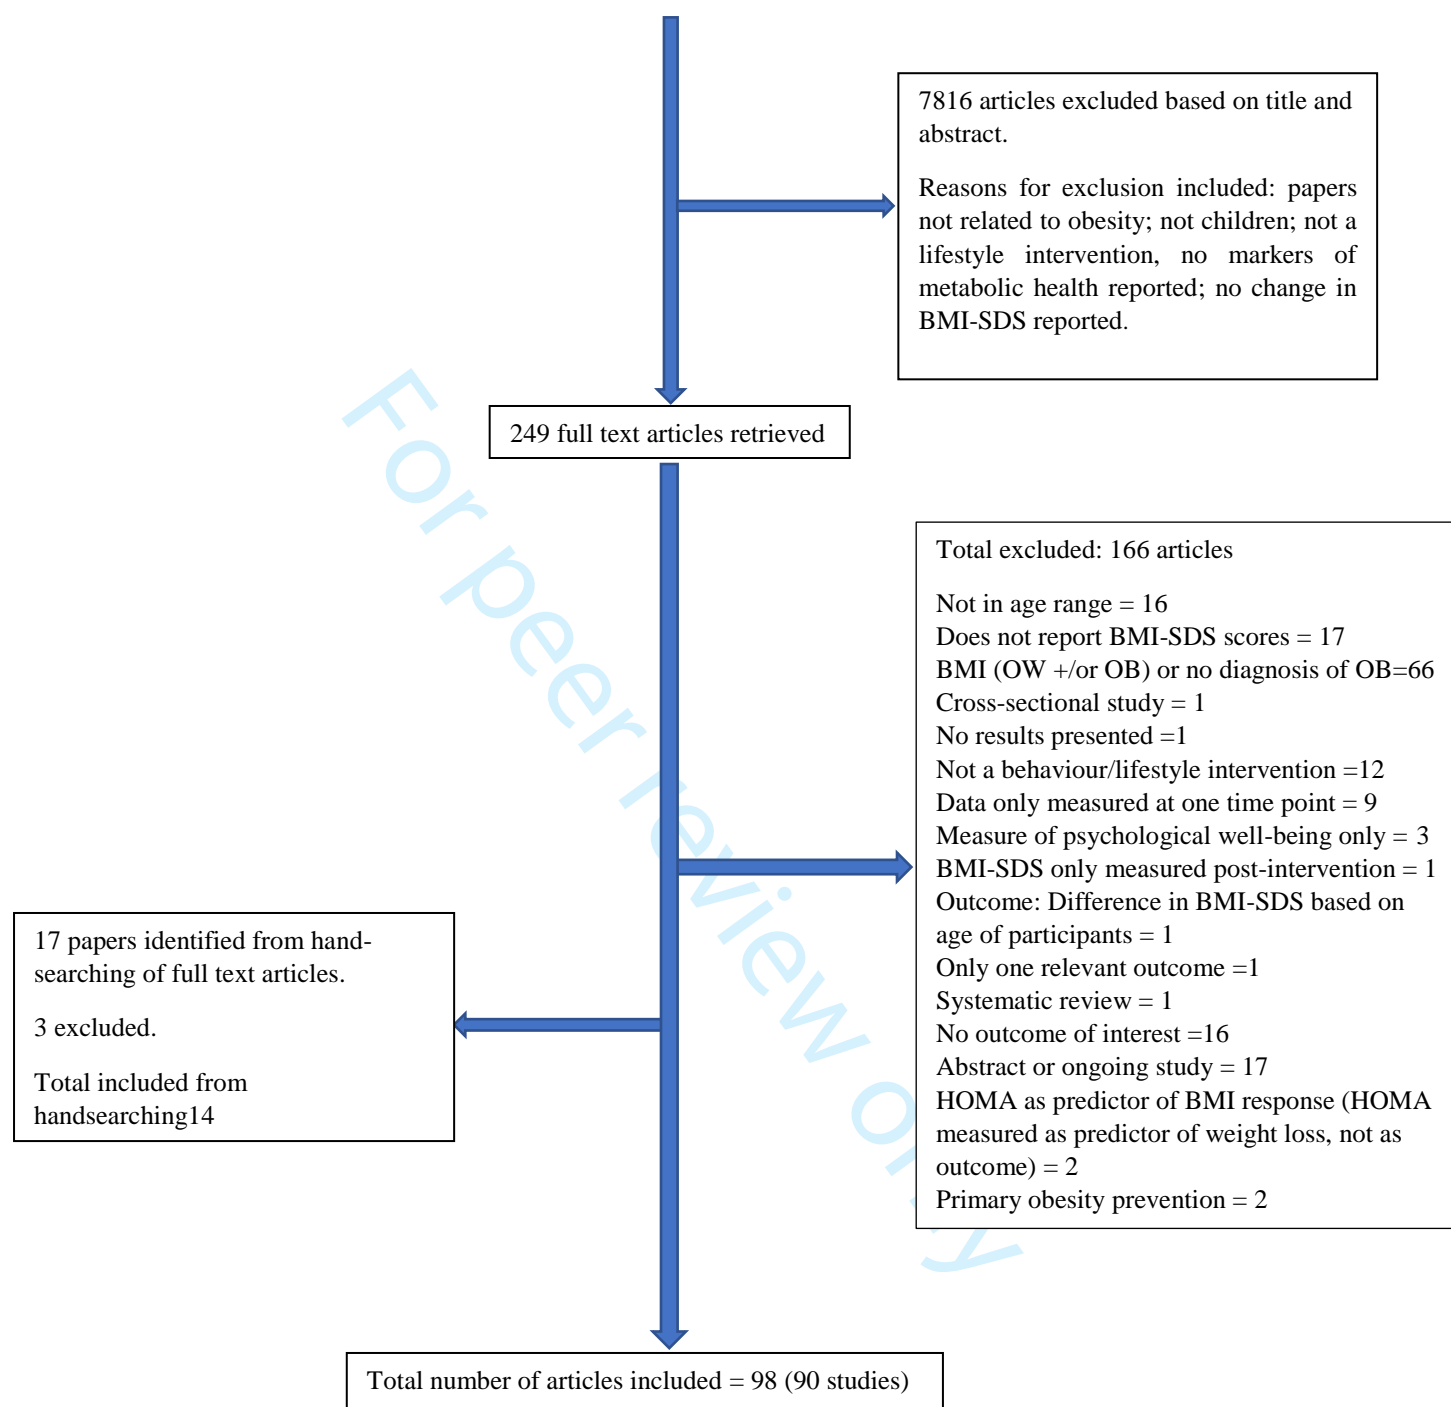

1  
2  
3 **Figure 2: Venn diagram illustrating the markers of metabolic health measured**  
4  
5

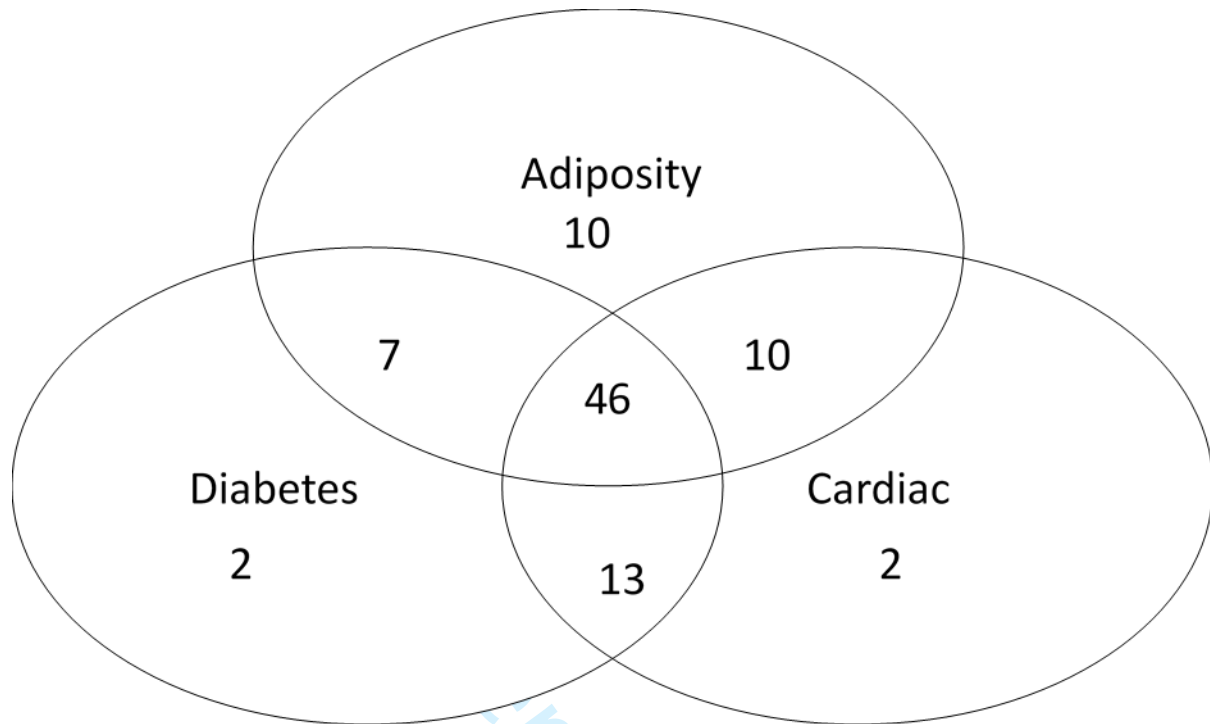

30 **TOTAL NUMBER OF STUDIES = 90**  
31  
32  
33  
34  
35  
36  
37  
38  
39  
40  
41  
42  
43  
44  
45  
46  
47  
48  
49  
50  
51  
52  
53  
54  
55  
56  
57  
58  
59  
60

1  
2  
3 **Figure 3: Meta-regression line showing the relationship between mean change in percentage body**  
4 **fat and BMI-SDS across the 39 studies (66 subsets) analysed**  
5

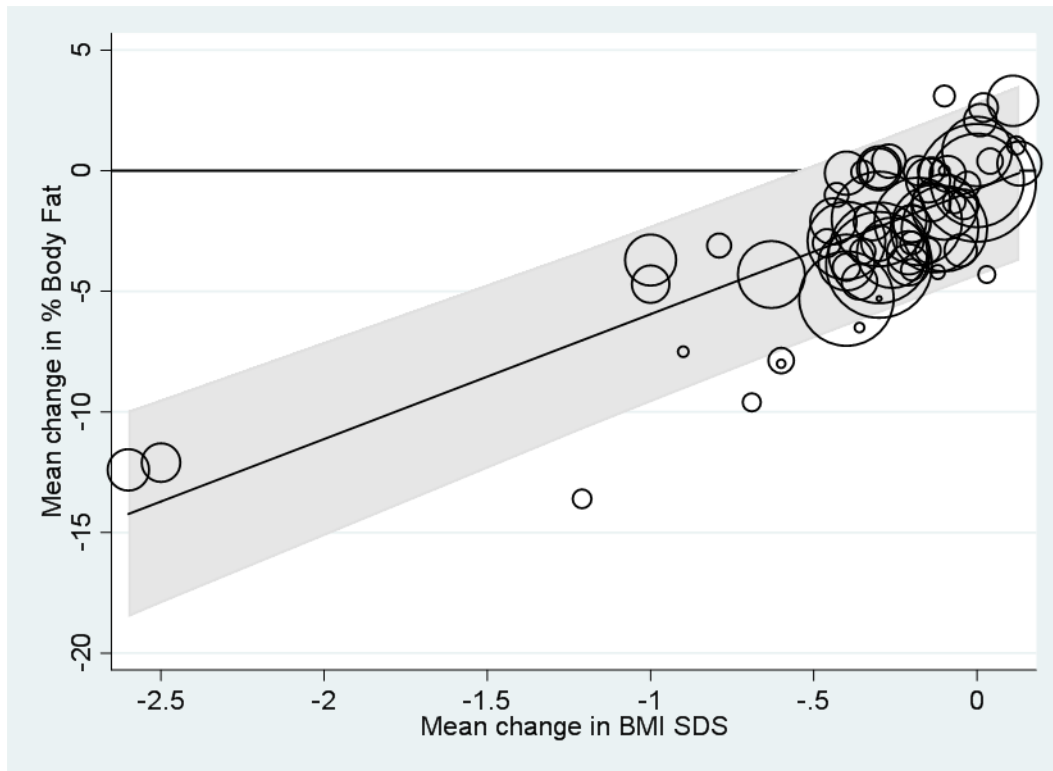

review only

Figure 4: Normal plot for the standardised predicted random effects from the meta-regression

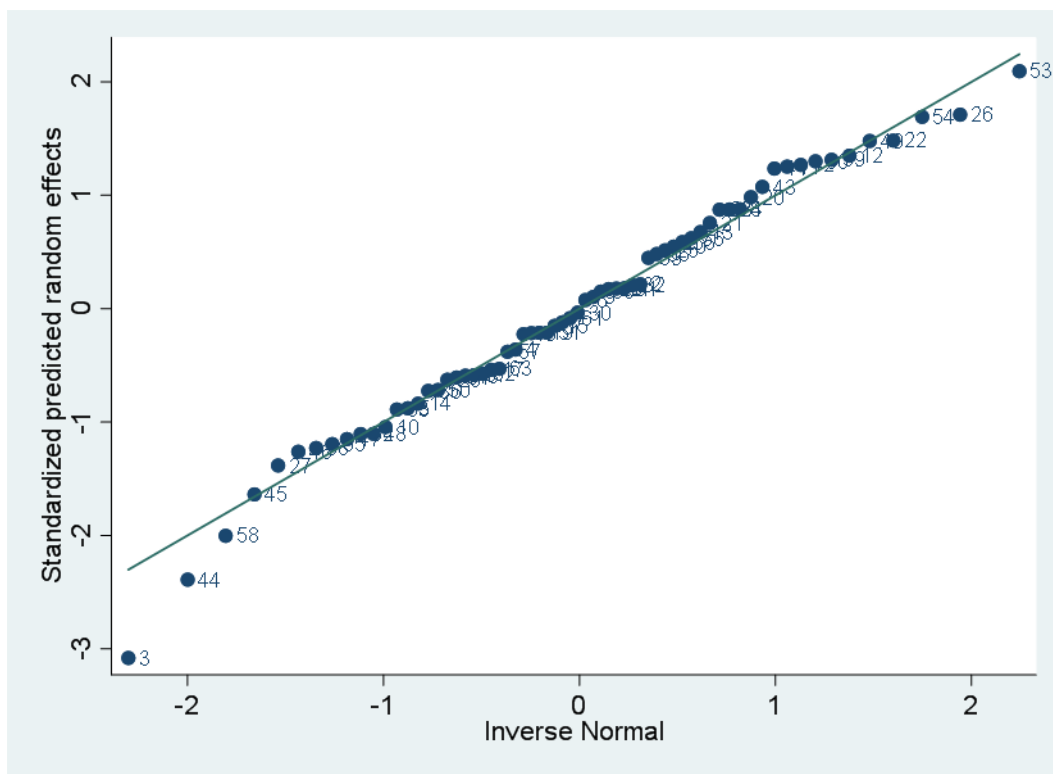

review only



1 *Figure 5: Sensitivity Analysis*

2  
3 *Sensitivity Analysis i: Based on the 22 subsets where the SEs of the mean changes in percentage body*  
4 *fat were known (Fitted meta-regression line: Mean change in % body fat = 4.502 x Mean change in*  
5 *BMI SDS – 0.810).*

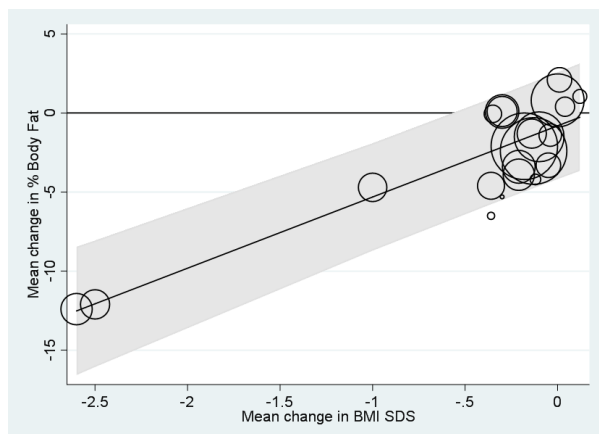

21  
22  
23 *Sensitivity Analysis ii: Using all data subsets but excluding two extreme values (reduction of mean BMI-*  
24 *SDS of more than 1.5), leaving 64 subsets (Fitted meta-regression line: Mean change in % body fat =*  
25 *7.078 x Mean change in BMI SDS – 0.318).*

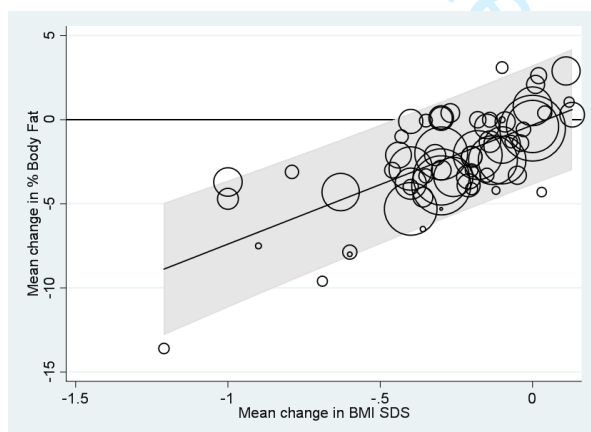

41  
42  
43 *Sensitivity Analysis iii: Using all 66 data subsets but using a correlation coefficient of 0.50, rather than*  
44 *0.81, to estimate the SE of the mean change in % body fat for the 66-22=44 subsets where this was not*  
45 *available (Fitted regression line: Mean change in % body fat = 5.039 x Mean change in BMI-SDS -*  
46 *0.783).*

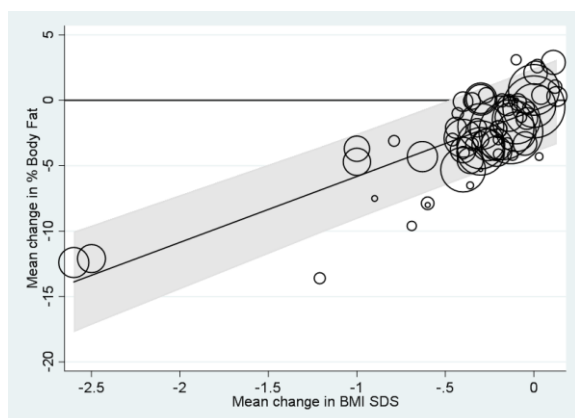

**APPENDIX 1: Childhood obesity BMI systematic review\_MEDLINE**

- 1  
2  
3  
4  
5  
6  
7  
8  
9  
10  
11  
12  
13  
14  
15  
16  
17  
18  
19  
20  
21  
22  
23  
24  
25  
26  
27  
28  
29  
30  
31  
32  
33  
34  
35  
36  
37  
38  
39  
40  
41  
42  
43  
44  
45  
46  
47  
48  
49  
50  
51  
52  
53  
54  
55  
56  
57  
58  
59  
60
1. exp Child/  
2. exp Adolescent/  
3. juvenile.tw.  
4. exp Infant/  
5. exp Pediatrics/  
6. child\$.tw.  
7. infant\$.tw.  
8. teen\$.tw.  
9. p?ediatric\$.tw.  
10. young person.tw.  
11. schoolchild\$.tw.  
12. youth.tw.  
13. (boy\$ or girl\$).tw.  
14. 1 or 2 or 3 or 4 or 5 or 6 or 7 or 8 or 9 or 10 or 11 or 12 or 13  
15. exp body weight/  
16. exp energy metabolism/  
17. exp obesity/  
18. exp childhood obesity/  
19. exp metabolic syndrome X/  
20. exp metabolic disorder/  
21. (metabol\$ adj1 disorder\$).ti,ab.  
22. (metabol\$ adj1 syndrome\$).ti,ab.  
23. (cardiometabolic or cardio-metabolic or cardio metabolic).ti,ab.  
24. (weight adj3 (cyc\$ or reduc\$ or los\$ or maint\$ or decreas\$ or watch\$ or control\$ or gain\$ or chang\$)).tw.  
25. (body fat or body fat percent\$ or percent\$ body fat or fat mass or adipos\$).ti,ab.  
26. waist-hip ratio\$.tw.  
27. waist circumferenc\$.ti,ab.  
28. (lean adj1 body adj1 mass).ti,ab.  
29. (percentage adj1 body adj1 fat).ti,ab.  
30. fat.ti,ab.  
31. obes\$.ti,ab.  
32. (overweight or over weight or over-weight).ti,ab.  
33. exp abdominal fat/  
34. adipose tissue/  
35. ((food or energy or calor\$) adj1 intake).ti,ab.  
36. (BMI or body mass ind\$ or body-mass-ind\$ or weight for height or weight-for-height).ti,ab.  
37. (overfeed\$ or over feed\$).tw.  
38. (overeate\$ or over eat\$).tw.  
39. exp weight gain/  
40. exp weight reduction/  
41. (weight adj1 los\$).ti,ab.  
42. (fat adj1 los\$).ti,ab.  
43. 15 or 16 or 17 or 18 or 19 or 20 or 21 or 22 or 23 or 24 or 25 or 26 or 27 or 28 or 29 or 30 or 31 or 32 or 33 or 34 or 35 or 36 or 37 or 38 or 39 or 40 or 41 or 42  
44. (BMI adj5 z score).af.  
45. (BMI adj5 SDS).af.  
46. (BMI adj5 standard adj1 deviation).af.  
47. (Body adj1 mass adj1 index adj5 sd adj1 score).af.  
48. (Body adj1 mass adj1 index adj5 SD).af.  
49. 44 or 45 or 46 or 47 or 48  
50. 14 and 43 and 49

1  
2  
3  
4  
5  
6  
7  
8  
9  
10  
11  
12  
13  
14  
15  
16  
17  
18  
19  
20  
21  
22  
23  
24  
25  
26  
27  
28  
29  
30  
31  
32  
33  
34  
35  
36  
37  
38  
39  
40  
41  
42  
43  
44  
45  
46

**Appendix 2: Characteristic of studies excluded from meta-regression**

|     | <b>Author, Year, Country (Intervention name)</b>   | <b>Study design: Sample size (n) Analysed (An)</b>                                                                 | <b>Obesity definition</b>                                                           | <b>Diet D)/ Exercise (E)/D+E: Setting</b> | <b>Format &amp; content</b>                                                                                                                                                                                                                                                                                                                             | <b>Adiposity outcome measurement or reasons for exclusion for meta-regression</b> |
|-----|----------------------------------------------------|--------------------------------------------------------------------------------------------------------------------|-------------------------------------------------------------------------------------|-------------------------------------------|---------------------------------------------------------------------------------------------------------------------------------------------------------------------------------------------------------------------------------------------------------------------------------------------------------------------------------------------------------|-----------------------------------------------------------------------------------|
| 1.  | Carraway 2014 <sup>1</sup><br>USA                  | Cohort<br>Total = 52 (subgroup n =33 & families offered FU for 10 months)                                          | BMI > 95th %ile                                                                     | Community                                 | 6 x 1 hr nutrition sessions + ad-lib access to a nutritious diet + 7hr/day PA + GT + CBT.                                                                                                                                                                                                                                                               | WC only                                                                           |
| 2.  | Croker 2012 <sup>2</sup><br>UK                     | RCT:<br>Total = 72 (63)<br>FBBT= 37 (33)<br>OC =35 (30)                                                            | OW or Ob as per IOTF<br>Mean BMI SDS>3                                              | D+E<br>Clinic (Hospital)                  | Reduce snacking ≤ 2 occasions/day + Balanced diet following 'Eatwell plate and 'Traffic Light system' + Reduce sedentary behaviour + 60 min/day exercise.                                                                                                                                                                                               | body mass, fat mass, WC &WC-SDS                                                   |
| 3.  | Doughty 2015 <sup>3</sup><br>USA                   | Cohort<br>Total = 12                                                                                               | BMI ≥ 89th %ile.<br>Requested data from study authors regarding OB/OW– no response. | D+E<br>Academic Institution               | Behavioural counselling + Daily caloric targets + 2 x 1hr/5 days and one 1hr/day physical training) + behavioural counselling.                                                                                                                                                                                                                          | WC. body mass                                                                     |
| 4.  | Elloumi 2009 <sup>4</sup><br>Tunisia               | RCT<br>Total =21<br>Energy restriction =7<br>Exercise training =7<br>Both =7                                       | BMI > 97th %ile<br>(French standards)                                               | D+E<br>Academic Institution               | 2-month intervention. 3 groups, R = energy restricted group. E=individualised exercise group. RE= energy restriction + exercise. Individualized dietary advice by dietitian. 500kcal/day deficit (15% protein, 55% CHO, 30% fat). Exercise: 90 mins per day; 4 days per week. Intensity of exercise at heart rate corresponding to lipox <sub>max</sub> | Body mass, fat mass                                                               |
| 5.  | Grulich-Henn, 2011 <sup>5</sup><br>Germany         | Cohort Total = 58                                                                                                  | BMI > 97th %ile<br>(German paed. standards)                                         | D + E<br>Academic Institution             | 6 x monthly nutritional consultation & CBT + 24 weekly PA programs.                                                                                                                                                                                                                                                                                     | Body mass only                                                                    |
| 6.  | Gunnarsdottir, 2014 <sup>6</sup><br>Iceland        | Cohort Total = 84                                                                                                  | BMI z-score > 2.0 SDS<br>(Swedish growth curve)                                     | D+E<br>Clinic (Hospital)                  | Family-based Epstein behavioural intervention.                                                                                                                                                                                                                                                                                                          | Body mass only                                                                    |
| 7.  | Holm 2007 <sup>7</sup><br>Denmark                  | Cohort<br>Total enrolled =120; BL =110,<br>post-intervention = 87                                                  | BMI-SDS LMS method<br>(Danish ref pop.)                                             | D+E<br>Academic Institution               | Restricted low-fat diet (6500-7000 kJ/day) + Mandatory and optional PA.                                                                                                                                                                                                                                                                                 | number of pps not consistent for BMI-SDS and % body fat                           |
| 8.  | Kalavainen, 2012 <sup>8</sup><br>Finland           | RCT<br>Total = 70<br>routine treatment = 35,<br>group treatment = 35                                               | Wt-for-ht 115-182%                                                                  | D+E<br>Community                          | 2 interventions (Group and routine) - Routine (2 school health care sessions) + Group (10 x 90 min/wk parents and children separate focusing on healthy lifestyle/physical activity session, then next 5 sessions/2 wks + 1 session together)                                                                                                           | Fat mass only                                                                     |
| 9.  | Kolsgaard, 2011 <sup>9</sup><br>Norway             | Cohort<br>Total = 230 analysed (n= 307 started)                                                                    | BMI > 97.5 %ile for ht according to Norwegian percentiles.                          | D+E<br>Clinic (Hospital)                  | ~1hr biannual diet & PA (60 min/day exercise encouraged) counselling session with children & parent/s.                                                                                                                                                                                                                                                  | Body mass, WC                                                                     |
| 10. | Kolotourou 2013 <sup>10</sup><br>UK<br><b>MEND</b> | Cohort: Recruited from MEND<br>RCT.<br>Total = 230 analysed<br>Subsample 1 = 71 (6 mth RCT completers – both arms) | BMI ≥ 98 <sup>th</sup> %ile                                                         | D+E:<br>Community                         | Family-based 9-week MEND program (2 x wk group sessions including nutrition education, behaviour modification + fun-based PA) + 12 wk free family swim pass.                                                                                                                                                                                            | WC only                                                                           |

|     |                                                                                                                     |                                                               |                                                                                        |                              |                                                                                                                                                                                                                                                                                                                                                                                                                                                                           |                                                             |
|-----|---------------------------------------------------------------------------------------------------------------------|---------------------------------------------------------------|----------------------------------------------------------------------------------------|------------------------------|---------------------------------------------------------------------------------------------------------------------------------------------------------------------------------------------------------------------------------------------------------------------------------------------------------------------------------------------------------------------------------------------------------------------------------------------------------------------------|-------------------------------------------------------------|
|     |                                                                                                                     | Subsample 2 = 42 (12 mth RCT completers – IG only)            |                                                                                        |                              |                                                                                                                                                                                                                                                                                                                                                                                                                                                                           |                                                             |
| 11. | Marcano, 2011 <sup>11</sup><br>Venezuela                                                                            | Cohort<br>Total = 111                                         | OW: BMI >90th %ile/BMI z-score > 1.5.<br>OB: BMI >97th %ile/BMI z-score >2             | D+E:<br>Clinic (Hospital)    | Nutrition+PA recommendations + A form to register wkly hours of PA, number of steps taken/day, and hrs/wk spent in sedentary activities + Restrict calorie intake and focus on a balanced diet encouraged.                                                                                                                                                                                                                                                                | Body fat only                                               |
| 12. | Mager 2015 <sup>12</sup>                                                                                            | Cohort<br>Total=12 (completed =9)                             | CDC criteria                                                                           | D Clinic (but unclear)       | 1 session of education for parents and children and then follow up at 3 months and 6 months afterwards.                                                                                                                                                                                                                                                                                                                                                                   | WC only                                                     |
| 13. | Makkes 2016 <sup>13</sup><br>Netherlands                                                                            | RCT:<br>Total = 80<br>Short-stay (SS)=40<br>Long-stay (LS)=40 | BMI-SDS ≥3.0 or BMI-SDS ≥2.3 + OB-related comorbidity                                  | D+E:<br>Clinic (Hospital)    | Intensive 12-month lifestyle treatment. In-patient period of either 2 months (short-stay group) or 6 months (long-stay group). Short-stay group: biweekly 2-day return visits for 4 months, then monthly 2-day return visits for 6 months following in-pt period. Long-stay group: monthly 2-day return visits for 6 months following in-pt period.<br>Treatment: Nutrition, physical activity and behaviour change. Required active participation of parents/caregivers. | WC,WC-SDS                                                   |
| 14. | Martos, 2009 <sup>14</sup><br>Spain<br>(Same intervention as Valle Jimenez 2013 <sup>23</sup> but different sample) | Cohort<br>Total = 47                                          | BMI > 95th %ile on growth curves                                                       | D+E<br>Community             | Moderately OB subjects (Low-calorie diet); Severe/refractory OB subjects (Restriction diet of 25-30%) + Moderate/intense exercise 60 min/day x 5 days/wk encouraged.                                                                                                                                                                                                                                                                                                      | Body mass only                                              |
| 15. | Obert 2013 <sup>15</sup><br>France                                                                                  | Cohort<br>Total = 28 (plus 20 healthy lean controls)          | BMI > 97th French %ile                                                                 | D+E:<br>Clinic (Hospital)    | Cycle ergometer (9 x 5 mins x 3 times/week: 4 min moderate + 1 min intense) + 2 times/wk moderate exercise for 1st 2 mths                                                                                                                                                                                                                                                                                                                                                 | Body mass, fat mass                                         |
| 16. | Panagiotopoulos2011 <sup>16</sup><br>Canada                                                                         | Cohort<br>Total =119                                          | OB: BMI ≥ 95th %ile;<br>OW: BMI ≥ 85th %ile and <95th %ile with at least 1 comorbidity | D+E:<br>Clinic (Hospital)    | 10 x consecutive wkly group sessions (6-10 families): 30 min PA + nutrition session + behavioural session.                                                                                                                                                                                                                                                                                                                                                                | Body mass only                                              |
| 17. | Pozzato <sup>17</sup><br>Verduci 2011 <sup>18</sup><br>Italy                                                        | Cohort:<br>Total = 26                                         | >30kg/m <sup>2</sup> age and sex adjusted Cole <i>et al</i> curve                      | D+E.<br>Community and Clinic | Normocaloric balanced diet and active lifestyle based on italian guidelines for treatment of childhood obesity                                                                                                                                                                                                                                                                                                                                                            | WC only                                                     |
| 18. | Reinehr, 2004b <sup>19</sup><br>Germany<br>OBELDICKS                                                                | Cohort:<br>Total = 57                                         | BMI ≥ 97th %ile                                                                        | D+E:<br>Clinic (Hospital)    | Obeldicks - Intensive phase 3 mnths (Parents' course 2x/mnth + Behaviour therapy 2x/mnth + Nutritional course 2x/mnth + Exercise therapy 1x/wk) + Establishing phase 3 mnths (Talk rounds for parents 1x/mnth + Psychological therapy + Exercise therapy 1x/wk) + Establishing phase 2 for 3 mnths (Psychological therapy + Exercise therapy 1x/wk) + Establishing phase 3 for 3 mnths (Exercise therapy 1x/wk).                                                          | Body fat only                                               |
| 19. | Reinehr, 2009 <sup>20</sup><br>Germany<br>OBELDICKS                                                                 | Cohort<br>Total = 109 (plus 43 obese controls)                | IOTF criteria: OB                                                                      | D+E:<br>Clinic (Hospital)    | Obeldicks (as above)                                                                                                                                                                                                                                                                                                                                                                                                                                                      | WC only                                                     |
| 20. | Rijks 2015 <sup>21</sup><br>Netherlands                                                                             | Non-randomised prospective study<br>Total = 172               | IOTF criteria: OW, OB, MO                                                              | D+E:<br>Clinic (Hospital)    | Guidance with focus on nutrition, food habits, PA, sleep, psychological and social aspects.                                                                                                                                                                                                                                                                                                                                                                               | WC-SDS only                                                 |
| 21. | Rovira 2013 <sup>22</sup><br>Spain                                                                                  | Cohort<br>Total = 110                                         | BMI ≥ 97th %ile                                                                        | D+E<br>Clinic (Hospital)     | 12 x monthly visits in 2 phases: motivational and intervention. Focus on promoting healthy eating, encouraging PA & decreasing sedentary behaviour.                                                                                                                                                                                                                                                                                                                       | Only reported as 'good responders' and 'poor responders' to |

1  
2  
3  
4  
5  
6  
7  
8  
9  
10  
11  
12  
13  
14  
15  
16  
17  
18  
19  
20  
21  
22  
23  
24  
25  
26  
27  
28  
29  
30  
31  
32  
33  
34  
35  
36  
37  
38  
39  
40  
41  
42  
43  
44  
45  
46

|     |                                                         |                                                                                      |                                                                 |                                                |                                                                                                                                                                                                                                                                                                                                                                                                  |                                                                    |
|-----|---------------------------------------------------------|--------------------------------------------------------------------------------------|-----------------------------------------------------------------|------------------------------------------------|--------------------------------------------------------------------------------------------------------------------------------------------------------------------------------------------------------------------------------------------------------------------------------------------------------------------------------------------------------------------------------------------------|--------------------------------------------------------------------|
|     |                                                         |                                                                                      |                                                                 |                                                |                                                                                                                                                                                                                                                                                                                                                                                                  | intervention so removed from analysis                              |
| 22. | Santomauro 2011 <sup>23</sup><br>Venezuela              | Cohort<br>Total = 36                                                                 | BMI > 97 <sup>th</sup> %ile                                     | D+E:<br>Clinic (Hospital)                      | Dietary recommendations + 30 mins daily moderate exercise or 3 x wk moderate exercise + decrease time watching TV/video games.                                                                                                                                                                                                                                                                   | Body mass, fat mass                                                |
| 23. | Schum 2012 <sup>24</sup><br>Germany                     | Cohort:<br>Total = 75<br>HZ=52<br>HO= 21                                             | BMI-SDS > 2                                                     | E:<br>Community                                | Increase to 2 hrs/day PA + nutritional recommendations based on 'Optimised Mixed Diet for German Children and Adolescents' + close surveillance by physician.                                                                                                                                                                                                                                    | Fat mass, WC                                                       |
| 24. | Shalitin, 2009 <sup>25</sup>                            | Cohort:<br>Total = 174 randomised<br>E =58 (52)<br>D =58 (55)<br>D+E = 58 (55)       | BMI > 95 <sup>th</sup> %ile for age & gender                    | D+E:<br>Clinic (Hospital)                      | 3-month interventions: Exercise intervention (90 min moderate exercise 3 days/wk); Diet intervention 3 mths (12 x/wk nutritional group meetings with parents + Hypocaloric diet 1200 kcal/day); Diet and exercise intervention 3 mths (90 min training session days/wk + 12 x/wk nutritional group meetings with parents + Hypocaloric diet 1200 kcal/day).                                      | SEs were calculated from a mixed model and not directly comparable |
| 25. | Springer 2015 <sup>26</sup><br>Germany                  | Cohort:<br>Total=39                                                                  | BMI > 90 <sup>th</sup> %ile                                     | D+E:<br>Clinic (Hospital)                      | Encouraged to increase exercise by 1-2 hrs/day + Decrease sedentary behaviour to a total of 2 hrs/day or less + Nutrition recommendations + 6 telephone calls from/visits to the physician.                                                                                                                                                                                                      | fat mass, WC & WC-SDS                                              |
| 26. | Tan-Ting 2011 <sup>27</sup><br>Philippines              | Cohort:<br>Total = 44                                                                | BMI ≥ 95 <sup>th</sup> %ile (CDC)                               | D+E:<br>Clinic (Hospital)                      | Multidisciplinary, individualised, behavioural modification and exercise programme (St Luke's Medical Center Obesity & Weight Management Program)<br>Dietary session (6 sessions over 3 mths) + Restricted diet (1200-1500 Kcal/day) + Physical activity (24 x 1hr sessions over 3 mths + encouraged to do ≥ 30 min of individual exercise) + Behavioural management (4 x sessions over 3 mths). | body mass, fat mass, WC & WC-SDS                                   |
| 27. | Valle Jimenez 2013 <sup>28</sup><br>Spain               | Cohort<br>Total = 50 (plus n=50 non-obese control)                                   | BMI >95 <sup>th</sup> percentile growth curves for Spanish pop. | D+E:<br>Academic Institution/Clinic (Hospital) | Behavioural components, physical exercise and nutritional education. Energy distribution of diet: 25% between breakfast & lunch; 30-35% at lunch; 15% afternoon snack; remainder dinner. Moderate-to-intense PA for 30 mins at least 3 days per wk. Aim that 1 month after the start of tx subjects should be engaging in 60 mins/day moderate-to-intense physical exercise.                     | Body mass only                                                     |
| 28. | Vanhelst 2013 <sup>29</sup><br>France                   | Cohort<br>Total=37                                                                   | ND                                                              | D+E:<br>Community                              | 2hr/wk exercise sessions + 2hr/3 months health education session.                                                                                                                                                                                                                                                                                                                                | Fat mass, fat free mass                                            |
| 29. | Vasquez 2013 <sup>30</sup><br>Chile                     | Cohort<br>X-over trial (Group 1 only)<br>Total = 60                                  | BMI ≥ 95 <sup>th</sup> %ile CDC                                 | D+E:<br>Academic Institution                   | Group nutrition education sessions x 6 (5 for children; 1 for parents)<br>Psychologist support sessions x 6 (5 for children; 1 for parents)<br>PE 45 mins x3/wk (30 sessions in total)                                                                                                                                                                                                           | Body mass, WC                                                      |
| 30. | Verduci 2015 <sup>31</sup><br>Italy                     | Cohort:<br>Total = 85                                                                | BMI Cole's curve cut-off 30 kg/m <sup>2</sup> at 18 yrs         | D+E:<br>Clinic (Hospital)                      | Normocaloric balanced diet + 60 min/day moderate/vigorous exercise + 1 hr educational session with dietician at recruitment.                                                                                                                                                                                                                                                                     | WC only                                                            |
| 31. | Vos, 2011 <sup>32</sup><br>Netherlands                  | RCT<br>Total = 81 (BL: 79 An. 69)<br>I = 41 (BL 40: An. 36)<br>OC=40 (BL 39: An. 33) | Cole <i>et al</i> criteria                                      | D+E:<br>Clinic (Hospital)                      | 12 mths: During first 3 mths (7 x 2.5 hr/2 wks children group meetings + 5 x 2.5 hr/2 wks parent meetings + 1 x 2.5 hr/2 wks child/parent meeting + 2-3 refresher follow-up sessions for total of 2 yrs).<br>Also included exercise however not described except in flow diagram                                                                                                                 | WC-SDS only                                                        |
| 32. | Weiss 2009 <sup>33</sup><br>USA<br>Yale<br><b>TEAMS</b> | Cohort:<br>Total = 186                                                               | BMI > 95 <sup>th</sup> %ile (CDC)                               | D+E:<br>Clinic (Hospital)                      | Subjects followed biannually as outpatients + Received nutritional/PA guidance. Levels of adherence to these recommendations was not evaluated or documented                                                                                                                                                                                                                                     | Body mass only                                                     |

|     |                                      |                                          |                                                                                                                |                   |                                                                                   |                |
|-----|--------------------------------------|------------------------------------------|----------------------------------------------------------------------------------------------------------------|-------------------|-----------------------------------------------------------------------------------|----------------|
| 33. | Weigel 2008 <sup>34</sup><br>Germany | RCT:<br>Total = 73<br>IG = 37<br>OC = 36 | OW BMI > 90 <sup>th</sup> %ile<br>OB BMI > 97 <sup>th</sup> %ile<br>Extremely OB BMI > 99.5 <sup>th</sup> %ile | D+E:<br>Community | Twice wkly 45-60 min sessions on exercise/dietary education/coping strategies.    | Fat mass only  |
| 34. | Wong 2009 <sup>35</sup><br>USA       | Cohort:<br>Total = 21                    | BMI ≥ 95 <sup>th</sup> %ile                                                                                    | D+E:<br>Community | 6 x 1hr behavioural lessons + 4 x 1hr PA/ nutrition lessons + 1800 kcal/day diet. | body mass only |

**KEY:** %ile = percentile; AmO = Outpatient Ambulatory; An. = analysed; apt. = appointment; BB =Bright Bodies; BFC = Better food choices; BL = baseline; BM = behaviour modification; BMI= body mass index; C = control; CG: control group; CBT = cognitive behavioural therapy; CDC = Centre for Disease Control; CG = control group; CHO = carbohydrate; D = diet; E = exercise; FBBT = family-based behavioural treatment; F = female; FU = follow up; GI = glycaemic index; GT = group therapy; HGI = high glycaemic index; hr = hour; HZ = heterozygous; HO = homozygous; ht = height; I = intervention; IG= intervention group; IOTF = International Obesity Task Force; Inpt. = inpatient; LGI = low glycaemic index; LMS= least-mean-squares; LS = long stay; min= minute; mth = month; MO = morbidly obese; norm. normal; n = number; NAFLD = Non-alcoholic fatty liver disease; ND = not described; NR = not reported; OB = obese; OC = obese control; OW = overweight; paed. = paediatric; PA = physical activity; PE = physical activity; PROT= protein; ppts= participants; RCT = randomised controlled trial; SD = standard deviation; SDS = standard deviation score; SE: standard error; SMP= Structured meal plan; SS= short stay; SMC= structured modified carbohydrate diet; trad. = traditional; Trad. act = traditional activity; tx = treatment; TEAMS = Tracking Endpoints in Adolescent MS; wk = week; WList OC– wait list obese control; WL = weight loss; wt = weight; X-over = crossover; yr = year

- 1  
2  
3 1. Carraway ME, Lutes LD, Crawford Y, et al. Camp-based immersion treatment for obese, low  
4 socioeconomic status, multi-ethnic adolescents. *Childhood obesity* (Print). 2014;10(2): 122-  
5 131  
6
- 7  
8 2. Croker H, Viner RM, Nicholls D. Family-based behavioural treatment of childhood obesity in  
9 a UK National Health Service setting: randomized controlled trial. *International Journal of*  
10 *Obesity*. 2012; 36(1):16-26  
11
- 12  
13 3. Doughty KN, Njike VY, Katz DL. Effects of a Cognitive-Behavioral Therapy-Based  
14 Immersion Obesity Treatment Program for Adolescents on Weight, Fitness, and Cardiovascular  
15 Risk Factors: A Pilot Study. *Childhood Obesity*. 2015;11(2):215-218  
16
- 17  
18 4. Elloumi M, Ben Ounis O, Makni E, Van Praagh E, Tabka Z, Lac G. Effect of individualized  
19 weight-loss programmes on adiponectin, leptin and resistin levels in obese adolescent boys.  
20 *Acta Paediatr*. 2009; 98(9):1487-93  
21
- 22  
23 5. Grulich-Henn J, Lichtenstein S, Hörster F, Hoffmann GF, Nawroth PP, Hamann A. Moderate  
24 weight reduction in an outpatient obesity intervention program significantly reduces insulin  
25 resistance and risk factors for cardiovascular disease in severely obese adolescents. *Int J*  
26 *Endocrinol*. 2011:541021  
27
- 28  
29 6. Gunnarsdottir T, Einarsson SM, Njardvik U, et al. Family-based behavioral treatment for obese  
30 children - results and two year follow up. *Laknabladid*. 2014;100(3):139-45  
31
- 32  
33 7. Holm JC, Buckert M, Hans-Christoph Friederich H-C, et al. Time course and determinants of  
34 leptin decline during weight loss in obese boys and girls. *International Journal of Pediatric*  
35 *Obesity*. 2007; 2(1): 2-10  
36
- 37  
38 8. Kalavainen M, Utriainen P, Vanninen E, Korppi M, Nuutinen O. Impact of childhood obesity  
39 treatment on body composition and metabolic profile. *World Journal of Pediatrics*. 2012;  
40 8(1):31-7  
41
- 42  
43 9. Kolsgaard ML, Joner G, Brunborg C, et al. Reduction in BMI z-score and improvement in  
44 cardiometabolic risk factors in obese children and adolescents. The Oslo Adiposity Intervention  
45 Study - a hospital/public health nurse combined treatment.[Erratum appears in *BMC Pediatr*.  
46 2012;12:77; PMID: 22709339]. *BMC Pediatrics*. 2011; 11: 47  
47
- 48  
49 10. Kolotourou M, Radley D, Gammon C, Smith L, Chadwick P, Sacher PM. Long-Term  
50 Outcomes following the MEND 7-13 Child Weight Management Program. *Childhood Obesity*.  
51 2015;11(3): 325-330  
52  
53  
54  
55  
56  
57  
58  
59  
60



- 1  
2  
3 11. Marcano, H, Fernández M, Paoli M, et al. Limited Weight Loss or Simply No Weight Gain  
4 following Lifestyle-Only Intervention Tends to Redistribute Body Fat, to Decrease Lipid  
5 Concentrations, and to Improve Parameters of Insulin Sensitivity in Obese Children.  
6 *International Journal of Pediatric Endocrinology*. 2011(1): 241703  
7  
8  
9
- 10 12. Mager DR, Iñiguez IR, Gilmour S, Yap J. The effect of a low fructose and low glycemic  
11 index/load (FRAGILE) dietary intervention on indices of liver function, cardiometabolic risk  
12 factors, and body composition in children and adolescents with non-alcoholic fatty liver disease  
13 (NAFLD). *J Parenter Enteral Nutr*. 2015;39(1):73-84  
14  
15  
16
- 17 13. Makkes S, Renders CM, Bosmans JE, van der Baan-Slootweg OH, Hoekstra T, Seidell JC.  
18 One-year effects of two intensive inpatient treatments for severely obese children and  
19 adolescents. *BMC Pediatrics*. 2016; 16:120 doi: 10.1186/s12887-016-0659-x  
20  
21  
22
- 23 14. Martos R, Valle M, Morales RM, Cañete R, Gascón F, Urbano MM. Changes in body mass  
24 index are associated with changes in inflammatory and endothelial dysfunction biomarkers in  
25 obese prepubertal children after 9 months of body mass index SD score loss. *Metabolism-*  
26 *Clinical and Experimental*. 2009; 58(8):1153-1160  
27  
28  
29
- 30 15. Obert P, Gueugnon C, Nottin S, et al. Impact of diet and exercise training-induced weight loss  
31 on myocardial mechanics in severely obese adolescents. *Obesity*, 2013; 21(10): 2091-8  
32  
33  
34
- 35 16. Panagiotopoulos C, Ronsley R, Al-Dubayee M, et al. The Centre for Healthy Weights-  
36 Shapedown BC: A Family-Centered, Multidisciplinary Program that Reduces Weight Gain in  
37 Obese Children over the Short-Term. *International Journal of Environmental Research and*  
38 *Public Health*. 2011; 8(12):4662-4678  
39  
40  
41
- 42 17. Pozzato C, Verduci E, Scaglioni S, Liver Fat Change in Obese Children After a 1-year  
43 Nutrition-behavior Intervention. *Journal of Pediatric Gastroenterology and Nutrition*.  
44 2010;51(3), 331–335  
45  
46  
47
- 48 18. Verduci E, Radaelli G, Salvioni M, Riva E, Giovannini M. Plasma long-chain fatty acids profile  
49 and metabolic outcomes in normolipidaemic obese children after one-year nutritional  
50 intervention. *Acta paediatrica*. 2011;100(4): 585-9  
51  
52  
53
- 54 19. Reinehr T. and Andler W. Changes in the atherogenic risk factor profile according to degree of  
55 weight loss. *Archives of Disease in Childhood*. 2004;89(5):419-422  
56  
57  
58
- 59 20. Reinehr T, C Schmidt C, Toschke AM, Andler W. Lifestyle intervention in obese children with  
60 non-alcoholic fatty liver disease: 2-year follow-up study. *Archives of Disease in Childhood*.  
2009; 94(6):437-442



- 1
  - 2
  - 3
  - 4
  - 5
  - 6
  - 7
  - 8
  - 9
  - 10
  - 11
  - 12
  - 13
  - 14
  - 15
  - 16
  - 17
  - 18
  - 19
  - 20
  - 21
  - 22
  - 23
  - 24
  - 25
  - 26
  - 27
  - 28
  - 29
  - 30
  - 31
  - 32
  - 33
  - 34
  - 35
  - 36
  - 37
  - 38
  - 39
  - 40
  - 41
  - 42
  - 43
  - 44
  - 45
  - 46
  - 47
  - 48
  - 49
  - 50
  - 51
  - 52
  - 53
  - 54
  - 55
  - 56
  - 57
  - 58
  - 59
  - 60
21. Rijks JM, Plat J, Mensink RP, Dorenbos E, Buurman WA, Vreugdenhil AC. Children with morbid obesity benefit equally as children with overweight and obesity from an ongoing care program. *Journal of Endocrinol Metab.* 2015; 100(9): 3572-3580
22. Rovira AF, París Miró N, Zaragoza-Jordana M, et al. Clinical and metabolic effectiveness of a new motivational therapy for the treatment of obesity in adolescents (OBEMAT). *Anales De Pediatría.* 2013; 78(3): 157-166
23. Santomauro M, Paoli-Valeri M, Fernández M, et al. Non-alcoholic fatty liver disease and its association with clinical and biochemical variables in obese children and adolescents: Effect of a one-year intervention on lifestyle. *Endocrinología y Nutrición (English Edition)*, 2012;59(6): p. 346-353
24. Schum J, Blumenstock G, Weber K, et al. Variants of the FTO Gene in Obese Children and their Impact on Body Composition and Metabolism before and after Lifestyle Intervention. *Experimental and Clinical Endocrinology & Diabetes.* 2012;120(3):128-131
25. Shalitin S, Ashkenazi-Hoffnung L, Yackobovitch-Gavan M, et al. Effects of a Twelve-week randomized intervention of exercise and/or diet on weight loss and weight maintenance, and other metabolic parameters in obese preadolescent children. *Hormone Research.* 2009;72(5):287-301
26. Springer F, Ballweg V, Schweizer R, et al. Changes in whole-body fat distribution, intrahepatic lipids, and insulin resistance of obese adolescents during a low-level lifestyle intervention. *European Journal of Pediatrics,* 2015;174(12):1603-12
27. Tan-Ting AM, Llido L. Outcome of a hospital based multidisciplinary weight loss program in obese Filipino children. *Nutrition.* 2011; 27:50-54
28. Valle Jimenez M, Martos R, Morales RM, et al. Relationship between changes in plasma leptin concentrations and plasminogen activator inhibitor-1 in obese prepubertal children after nine months of treatment. *Annals of nutrition & metabolism.* 2013; 63(3): 216-22
29. Vanhelst J, Fardy PS, Béghin L, Bui-Xuan G, Mikulovic J. Strategies in intervention programmes for obese youth: implication of the age and the type of physical activities. *Clinical Physiology and Functional Imaging.* 2015; 35(1): 17-20
30. Vasquez F, Diaz E, Lera L, Vasquez L, Anziani A, Burrows R. Impact of a strength training exercise program on body composition and cardiovascular risk factors in a group of obese schoolchildren by pubertal stage. *American Journal of Sports Science and Medicine.* 2014; 2(1): 40-47
31. Verduci E, Lassandro C, Giacchero R, Miniello VL, Banderali G, Radaelli G. Change in metabolic profile after 1-year nutritional-behavioral intervention in obese children. *Nutrients.* 2015; 7(12): 10089-10099
32. Vos RC, Wit JM, Pijl H, Houdijk EC. Long-term effect of lifestyle intervention on adiposity, metabolic parameters, inflammation and physical fitness in obese children: a randomized controlled trial. *Nutrition & Diabetes.* 2011; 1:e9. doi: 10.1038/nutd.2011.5

- 1  
2  
3 33. Weiss R, Shaw M, Savoye M, Caprio S. Obesity dynamics and cardiovascular risk factor  
4 stability in obese adolescents. *Pediatric Diabetes*. 2009; 10(6): 360-7  
5  
6 34. Wiegand C, Kokocinski K, Lederer P, Dötsch J, Rascher W, Knerr I. Childhood obesity:  
7 Concept, feasibility, and interim results of a local group-based, long-term treatment program. *J*  
8 *Nutr Educ Behav*. 2008; 40:369-373  
9  
10 35. Wong WW, Abrams SH, Mikhail C, et al. An innovative summer camp program improves  
11 weight and self-esteem in obese children. *Journal of Pediatric Gastroenterology and*  
12 *Nutrition*. 2009; 49(4):493-497  
13  
14  
15  
16  
17  
18  
19  
20  
21  
22  
23  
24  
25  
26  
27  
28  
29  
30  
31  
32  
33  
34  
35  
36  
37  
38  
39  
40  
41  
42  
43  
44  
45  
46  
47  
48  
49  
50  
51  
52  
53  
54  
55  
56  
57  
58  
59  
60

For peer review only

1  
2  
3  
4  
5  
6  
7  
8  
9  
10  
11  
12  
13  
14  
15  
16  
17  
18  
19  
20  
21  
22  
23  
24  
25  
26  
27  
28  
29  
30  
31  
32  
33  
34  
35  
36  
37  
38  
39  
40  
41  
42  
43  
44  
45  
46

For peer review only

1  
2  
3 **Appendix 3: Meta-regression line and 95% prediction interval for the relationship between the mean**  
4 **change in percentage body fat and BMI-SDS across the 39 studies (66 subsets), as in Figure 3, but**  
5 **highlighting four subgroups of younger participants:**  
6

- 7 ● Dobe 2011<sup>37</sup>, aged 4-8y;
- 8
- 9 ● Gajewska 2016<sup>41</sup>, two groups aged 5-10y;
- 10
- 11 ● Kirk 2005<sup>46</sup>, group 1, aged 5-10
- 12

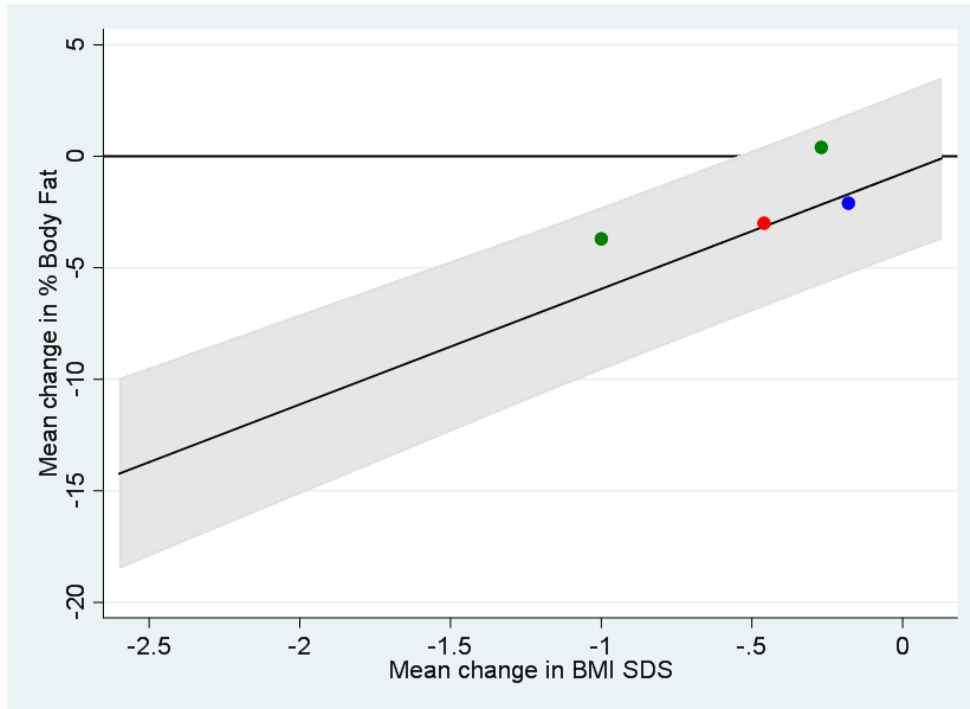

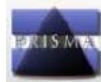

# PRISMA 2009 Checklist

| Section/topic                      | #  | Checklist item                                                                                                                                                                                                                                                                                              | Reported on page # |
|------------------------------------|----|-------------------------------------------------------------------------------------------------------------------------------------------------------------------------------------------------------------------------------------------------------------------------------------------------------------|--------------------|
| <b>TITLE</b>                       |    |                                                                                                                                                                                                                                                                                                             |                    |
| Title                              | 1  | Identify the report as a systematic review, meta-analysis, or both.                                                                                                                                                                                                                                         | 1                  |
| <b>ABSTRACT</b>                    |    |                                                                                                                                                                                                                                                                                                             |                    |
| Structured summary                 | 2  | Provide a structured summary including, as applicable: background; objectives; data sources; study eligibility criteria, participants, and interventions; study appraisal and synthesis methods; results; limitations; conclusions and implications of key findings; systematic review registration number. | 3                  |
| <b>INTRODUCTION</b>                |    |                                                                                                                                                                                                                                                                                                             |                    |
| Rationale                          | 3  | Describe the rationale for the review in the context of what is already known.                                                                                                                                                                                                                              | 4-6                |
| Objectives                         | 4  | Provide an explicit statement of questions being addressed with reference to participants, interventions, comparisons, outcomes, and study design (PICOS).                                                                                                                                                  | 6-9                |
| <b>METHODS</b>                     |    |                                                                                                                                                                                                                                                                                                             |                    |
| Protocol and registration          | 5  | Indicate if a review protocol exists, if and where it can be accessed (e.g., Web address), and, if available, provide registration information including registration number.                                                                                                                               | 7                  |
| Eligibility criteria               | 6  | Specify study characteristics (e.g., PICOS, length of follow-up) and report characteristics (e.g., years considered, language, publication status) used as criteria for eligibility, giving rationale.                                                                                                      | 7-8                |
| Information sources                | 7  | Describe all information sources (e.g., databases with dates of coverage, contact with study authors to identify additional studies) in the search and date last searched.                                                                                                                                  | 8                  |
| Search                             | 8  | Present full electronic search strategy for at least one database, including any limits used, such that it could be repeated.                                                                                                                                                                               | Appendix 1         |
| Study selection                    | 9  | State the process for selecting studies (i.e., screening, eligibility, included in systematic review, and, if applicable, included in the meta-analysis).                                                                                                                                                   | 9                  |
| Data collection process            | 10 | Describe method of data extraction from reports (e.g., piloted forms, independently, in duplicate) and any processes for obtaining and confirming data from investigators.                                                                                                                                  | 9                  |
| Data items                         | 11 | List and define all variables for which data were sought (e.g., PICOS, funding sources) and any assumptions and simplifications made.                                                                                                                                                                       | 8                  |
| Risk of bias in individual studies | 12 | Describe methods used for assessing risk of bias of individual studies (including specification of whether this was done at the study or outcome level), and how this information is to be used in any data synthesis.                                                                                      | 9                  |
| Summary measures                   | 13 | State the principal summary measures (e.g., risk ratio, difference in means).                                                                                                                                                                                                                               | 9-10               |
| Synthesis of results               | 14 | Describe the methods of handling data and combining results of studies, if done, including measures of consistency (e.g., I <sup>2</sup> ) for each meta-analysis.                                                                                                                                          | 9-10               |

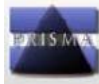

# PRISMA 2009 Checklist

Page 1 of 2

| Section/topic                 | #  | Checklist item                                                                                                                                                                                           | Reported on page # |
|-------------------------------|----|----------------------------------------------------------------------------------------------------------------------------------------------------------------------------------------------------------|--------------------|
| Risk of bias across studies   | 15 | Specify any assessment of risk of bias that may affect the cumulative evidence (e.g., publication bias, selective reporting within studies).                                                             | 9-10               |
| Additional analyses           | 16 | Describe methods of additional analyses (e.g., sensitivity or subgroup analyses, meta-regression), if done, indicating which were pre-specified.                                                         | 24                 |
| <b>RESULTS</b>                |    |                                                                                                                                                                                                          |                    |
| Study selection               | 17 | Give numbers of studies screened, assessed for eligibility, and included in the review, with reasons for exclusions at each stage, ideally with a flow diagram.                                          | 10                 |
| Study characteristics         | 18 | For each study, present characteristics for which data were extracted (e.g., study size, PICOS, follow-up period) and provide the citations.                                                             | 12-17              |
| Risk of bias within studies   | 19 | Present data on risk of bias of each study and, if available, any outcome level assessment (see item 12).                                                                                                | 20-21              |
| Results of individual studies | 20 | For all outcomes considered (benefits or harms), present, for each study: (a) simple summary data for each intervention group (b) effect estimates and confidence intervals, ideally with a forest plot. | 23-25              |
| Synthesis of results          | 21 | Present results of each meta-analysis done, including confidence intervals and measures of consistency.                                                                                                  | 23-25              |
| Risk of bias across studies   | 22 | Present results of any assessment of risk of bias across studies (see Item 15).                                                                                                                          | 20-21              |
| Additional analysis           | 23 | Give results of additional analyses, if done (e.g., sensitivity or subgroup analyses, meta-regression [see Item 16]).                                                                                    | 24-25              |
| <b>DISCUSSION</b>             |    |                                                                                                                                                                                                          |                    |
| Summary of evidence           | 24 | Summarize the main findings including the strength of evidence for each main outcome; consider their relevance to key groups (e.g., healthcare providers, users, and policy makers).                     | 26-28              |
| Limitations                   | 25 | Discuss limitations at study and outcome level (e.g., risk of bias), and at review-level (e.g., incomplete retrieval of identified research, reporting bias).                                            | 26-27              |
| Conclusions                   | 26 | Provide a general interpretation of the results in the context of other evidence, and implications for future research.                                                                                  | 29                 |
| <b>FUNDING</b>                |    |                                                                                                                                                                                                          |                    |
| Funding                       | 27 | Describe sources of funding for the systematic review and other support (e.g., supply of data); role of funders for the systematic review.                                                               | 1                  |

From: Moher D, Liberati A, Tetzlaff J, Altman DG, The PRISMA Group (2009). Preferred Reporting Items for Systematic Reviews and Meta-Analyses: The PRISMA Statement. PLoS Med 6(7): e1000097. doi:10.1371/journal.pmed1000097

For more information, visit: [www.prisma-statement.org](http://www.prisma-statement.org).

Page 2 of 2

For peer review only - <http://bmjopen.bmj.com/site/about/guidelines.xhtml>
