# Supplementary material for: What change in body mass index is associated with improvement in percentage body fat in childhood obesity? A meta-regression
Source: PubMed Central journal article supplement (PMC6720247; doi:10.1136/bmjopen-2018-028231), 2019-08-30
Supplement: bmjopen-2018-028231supp002.pdf [file bmjopen-2018-028231supp002.pdf]

## Appendix 2: Characteristic of studies excluded from meta-regression

|     | Author, Year, Country (Intervention name)          | Study design: Sample size (n) Analysed (An)                                                                        | Obesity definition                                                                  | Diet D)/ Exercise (E)/D+E: Setting | Format & content                                                                                                                                                                                                                                                                                                                                        | Adiposity outcome measurement or reasons for exclusion for meta-regression |
|-----|----------------------------------------------------|--------------------------------------------------------------------------------------------------------------------|-------------------------------------------------------------------------------------|------------------------------------|---------------------------------------------------------------------------------------------------------------------------------------------------------------------------------------------------------------------------------------------------------------------------------------------------------------------------------------------------------|----------------------------------------------------------------------------|
| 1.  | Carraway 2014 <sup>1</sup><br>USA                  | Cohort<br>Total = 52 (subgroup n =33 & families offered FU for 10 months)                                          | BMI > 95th %ile                                                                     | Community                          | 6 x 1 hr nutrition sessions + ad-lib access to a nutritious diet + 7hr/day PA + GT + CBT.                                                                                                                                                                                                                                                               | WC only                                                                    |
| 2.  | Croker 2012 <sup>2</sup><br>UK                     | RCT:<br>Total = 72 (63)<br>FBBT= 37 (33)<br>OC =35 (30)                                                            | OW or Ob as per IOTF<br>Mean BMI SDS>3                                              | D+E<br>Clinic (Hospital)           | Reduce snacking ≤ 2 occasions/day + Balanced diet following 'Eatwell plate and 'Traffic Light system' + Reduce sedentary behaviour + 60 min/day exercise.                                                                                                                                                                                               | body mass, fat mass, WC &WC-SDS                                            |
| 3.  | Doughty 2015 <sup>3</sup><br>USA                   | Cohort<br>Total = 12                                                                                               | BMI ≥ 89th %ile.<br>Requested data from study authors regarding OB/OW– no response. | D+E<br>Academic<br>Institution     | Behavioural counselling + Daily caloric targets + 2 x 1hr/5 days and one 1hr/day physical training) + behavioural counselling.                                                                                                                                                                                                                          | WC. body mass                                                              |
| 4.  | Elloumi 2009 <sup>4</sup><br>Tunisia               | RCT<br>Total =21<br>Energy restriction =7<br>Exercise training =7<br>Both =7                                       | BMI > 97th %ile<br>(French standards)                                               | D+E<br>Academic<br>Institution     | 2-month intervention. 3 groups, R = energy restricted group. E=individualised exercise group. RE= energy restriction + exercise. Individualized dietary advice by dietitian. 500kcal/day deficit (15% protein, 55% CHO, 30% fat). Exercise: 90 mins per day; 4 days per week. Intensity of exercise at heart rate corresponding to lipox <sub>max</sub> | Body mass, fat mass                                                        |
| 5.  | Grulich-Henn, 2011 <sup>5</sup><br>Germany         | Cohort Total = 58                                                                                                  | BMI > 97th %ile<br>(German paed. standards)                                         | D + E<br>Academic<br>Institution   | 6 x monthly nutritional consultation & CBT + 24 weekly PA programs.                                                                                                                                                                                                                                                                                     | Body mass only                                                             |
| 6.  | Gunnarsdottir, 2014 <sup>6</sup><br>Iceland        | Cohort Total = 84                                                                                                  | BMI z-score > 2.0 SDS<br>(Swedish growth curve)                                     | D+E<br>Clinic (Hospital)           | Family-based Epstein behavioural intervention.                                                                                                                                                                                                                                                                                                          | Body mass only                                                             |
| 7.  | Holm 2007 <sup>7</sup><br>Denmark                  | Cohort<br>Total enrolled =120; BL =110,<br>post-intervention = 87                                                  | BMI-SDS LMS method<br>(Danish ref pop.)                                             | D+E<br>Academic<br>Institution     | Restricted low-fat diet (6500-7000 kJ/day) + Mandatory and optional PA.                                                                                                                                                                                                                                                                                 | number of pps not consistent for BMI-SDS and % body fat                    |
| 8.  | Kalavainen, 2012 <sup>8</sup><br>Finland           | RCT<br>Total = 70<br>routine treatment = 35,<br>group treatment = 35                                               | Wt-for-ht 115-182%                                                                  | D+E<br>Community                   | 2 interventions (Group and routine) - Routine (2 school health care sessions) + Group (10 x 90 min/wk parents and children separate focusing on healthy lifestyle/physical activity session, then next 5 sessions/2 wks + 1 session together)                                                                                                           | Fat mass only                                                              |
| 9.  | Kolsgaard, 2011 <sup>9</sup><br>Norway             | Cohort<br>Total = 230 analysed (n= 307 started)                                                                    | BMI > 97.5 %ile for ht according to Norwegian percentiles.                          | D+E<br>Clinic (Hospital)           | ~1hr biannual diet & PA (60 min/day exercise encouraged) counselling session with children & parent/s.                                                                                                                                                                                                                                                  | Body mass, WC                                                              |
| 10. | Kolotourou 2013 <sup>10</sup><br>UK<br><b>MEND</b> | Cohort: Recruited from MEND<br>RCT.<br>Total = 230 analysed<br>Subsample 1 = 71 (6 mth RCT completers – both arms) | BMI ≥ 98 <sup>th</sup> %ile                                                         | D+E:<br>Community                  | Family-based 9-week MEND program (2 x wk group sessions including nutrition education, behaviour modification + fun-based PA) + 12 wk free family swim pass.                                                                                                                                                                                            | WC only                                                                    |

|     |                                                                                                                     |                                                               |                                                                                        |                              |                                                                                                                                                                                                                                                                                                                                                                                                                                                                           |                                                             |
|-----|---------------------------------------------------------------------------------------------------------------------|---------------------------------------------------------------|----------------------------------------------------------------------------------------|------------------------------|---------------------------------------------------------------------------------------------------------------------------------------------------------------------------------------------------------------------------------------------------------------------------------------------------------------------------------------------------------------------------------------------------------------------------------------------------------------------------|-------------------------------------------------------------|
|     |                                                                                                                     | Subsample 2 = 42 (12 mth RCT completers – IG only)            |                                                                                        |                              |                                                                                                                                                                                                                                                                                                                                                                                                                                                                           |                                                             |
| 11. | Marcano, 2011 <sup>11</sup><br>Venezuela                                                                            | Cohort<br>Total = 111                                         | OW: BMI >90th %ile/BMI z-score > 1.5.<br>OB: BMI >97th %ile/BMI z-score >2             | D+E:<br>Clinic (Hospital)    | Nutrition+PA recommendations + A form to register wkly hours of PA, number of steps taken/day, and hrs/wk spent in sedentary activities + Restrict calorie intake and focus on a balanced diet encouraged.                                                                                                                                                                                                                                                                | Body fat only                                               |
| 12. | Mager 2015 <sup>12</sup>                                                                                            | Cohort<br>Total=12 (completed =9)                             | CDC criteria                                                                           | D Clinic (but unclear)       | 1 session of education for parents and children and then follow up at 3 months and 6 months afterwards.                                                                                                                                                                                                                                                                                                                                                                   | WC only                                                     |
| 13. | Makkes 2016 <sup>13</sup><br>Netherlands                                                                            | RCT:<br>Total = 80<br>Short-stay (SS)=40<br>Long-stay (LS)=40 | BMI-SDS ≥3.0 or BMI-SDS ≥2.3 + OB-related comorbidity                                  | D+E:<br>Clinic (Hospital)    | Intensive 12-month lifestyle treatment. In-patient period of either 2 months (short-stay group) or 6 months (long-stay group). Short-stay group: biweekly 2-day return visits for 4 months, then monthly 2-day return visits for 6 months following in-pt period. Long-stay group: monthly 2-day return visits for 6 months following in-pt period.<br>Treatment: Nutrition, physical activity and behaviour change. Required active participation of parents/caregivers. | WC,WC-SDS                                                   |
| 14. | Martos, 2009 <sup>14</sup><br>Spain<br>(Same intervention as Valle Jimenez 2013 <sup>23</sup> but different sample) | Cohort<br>Total = 47                                          | BMI > 95th %ile on growth curves                                                       | D+E<br>Community             | Moderately OB subjects (Low-calorie diet); Severe/refractory OB subjects (Restriction diet of 25-30%) + Moderate/intense exercise 60 min/day x 5 days/wk encouraged.                                                                                                                                                                                                                                                                                                      | Body mass only                                              |
| 15. | Obert 2013 <sup>15</sup><br>France                                                                                  | Cohort<br>Total = 28 (plus 20 healthy lean controls)          | BMI > 97th French %ile                                                                 | D+E:<br>Clinic (Hospital)    | Cycle ergometer (9 x 5 mins x 3 times/week: 4 min moderate + 1 min intense) + 2 times/wk moderate exercise for 1st 2 mths                                                                                                                                                                                                                                                                                                                                                 | Body mass, fat mass                                         |
| 16. | Panagiotopoulos2011 <sup>16</sup><br>Canada                                                                         | Cohort<br>Total =119                                          | OB: BMI ≥ 95th %ile;<br>OW: BMI ≥ 85th %ile and <95th %ile with at least 1 comorbidity | D+E:<br>Clinic (Hospital)    | 10 x consecutive wkly group sessions (6-10 families): 30 min PA + nutrition session + behavioural session.                                                                                                                                                                                                                                                                                                                                                                | Body mass only                                              |
| 17. | Pozzato <sup>17</sup><br>Verduci 2011 <sup>18</sup><br>Italy                                                        | Cohort:<br>Total = 26                                         | >30kg/m2 age and sex adjusted Cole <i>et al</i> curve                                  | D+E.<br>Community and Clinic | Normocaloric balanced diet and active lifestyle based on italian guidelines for treatment of childhood obesity                                                                                                                                                                                                                                                                                                                                                            | WC only                                                     |
| 18. | Reinehr, 2004b <sup>19</sup><br>Germany<br>OBELDICKS                                                                | Cohort:<br>Total = 57                                         | BMI ≥ 97th %ile                                                                        | D+E:<br>Clinic (Hospital)    | Obeldicks - Intensive phase 3 mnths (Parents' course 2x/mnth + Behaviour therapy 2x/mnth + Nutritional course 2x/mnth + Exercise therapy 1x/wk) + Establishing phase 3 mnths (Talk rounds for parents 1x/mnth + Psychological therapy + Exercise therapy 1x/wk) + Establishing phase 2 for 3 mnths (Psychological therapy + Exercise therapy 1x/wk) + Establishing phase 3 for 3 mnths (Exercise therapy 1x/wk).                                                          | Body fat only                                               |
| 19. | Reinehr, 2009 <sup>20</sup><br>Germany<br>OBELDICKS                                                                 | Cohort<br>Total = 109 (plus 43 obese controls)                | IOTF criteria: OB                                                                      | D+E:<br>Clinic (Hospital)    | Obeldicks (as above)                                                                                                                                                                                                                                                                                                                                                                                                                                                      | WC only                                                     |
| 20. | Rijks 2015 <sup>21</sup><br>Netherlands                                                                             | Non-randomised prospective study<br>Total = 172               | IOTF criteria: OW, OB, MO                                                              | D+E:<br>Clinic (Hospital)    | Guidance with focus on nutrition, food habits, PA, sleep, psychological and social aspects.                                                                                                                                                                                                                                                                                                                                                                               | WC-SDS only                                                 |
| 21. | Rovira 2013 <sup>22</sup><br>Spain                                                                                  | Cohort<br>Total = 110                                         | BMI ≥ 97th %ile                                                                        | D+E<br>Clinic (Hospital)     | 12 x monthly visits in 2 phases: motivational and intervention. Focus on promoting healthy eating, encouraging PA & decreasing sedentary behaviour.                                                                                                                                                                                                                                                                                                                       | Only reported as 'good responders' and 'poor responders' to |

|     |                                                         |                                                                                      |                                                                 |                                                |                                                                                                                                                                                                                                                                                                                                                                                                  |                                                                    |
|-----|---------------------------------------------------------|--------------------------------------------------------------------------------------|-----------------------------------------------------------------|------------------------------------------------|--------------------------------------------------------------------------------------------------------------------------------------------------------------------------------------------------------------------------------------------------------------------------------------------------------------------------------------------------------------------------------------------------|--------------------------------------------------------------------|
|     |                                                         |                                                                                      |                                                                 |                                                |                                                                                                                                                                                                                                                                                                                                                                                                  | intervention so removed from analysis                              |
| 22. | Santomauro 2011 <sup>23</sup><br>Venezuela              | Cohort<br>Total = 36                                                                 | BMI > 97 <sup>th</sup> %ile                                     | D+E:<br>Clinic (Hospital)                      | Dietary recommendations + 30 mins daily moderate exercise or 3 x wk moderate exercise + decrease time watching TV/video games.                                                                                                                                                                                                                                                                   | Body mass, fat mass                                                |
| 23. | Schum 2012 <sup>24</sup><br>Germany                     | Cohort:<br>Total = 75<br>HZ=52<br>HO= 21                                             | BMI-SDS > 2                                                     | E:<br>Community                                | Increase to 2 hrs/day PA + nutritional recommendations based on 'Optimised Mixed Diet for German Children and Adolescents' + close surveillance by physician.                                                                                                                                                                                                                                    | Fat mass, WC                                                       |
| 24. | Shalitin, 2009 <sup>25</sup>                            | Cohort:<br>Total = 174 randomised<br>E =58 (52)<br>D =58 (55)<br>D+E = 58 (55)       | BMI > 95 <sup>th</sup> %ile for age & gender                    | D+E:<br>Clinic (Hospital)                      | 3-month interventions: Exercise intervention (90 min moderate exercise 3 days/wk); Diet intervention 3 mths (12 x/wk nutritional group meetings with parents + Hypocaloric diet 1200 kcal/day); Diet and exercise intervention 3 mths (90 min training session days/wk + 12 x/wk nutritional group meetings with parents + Hypocaloric diet 1200 kcal/day).                                      | SEs were calculated from a mixed model and not directly comparable |
| 25. | Springer 2015 <sup>26</sup><br>Germany                  | Cohort:<br>Total=39                                                                  | BMI > 90 <sup>th</sup> %ile                                     | D+E:<br>Clinic (Hospital)                      | Encouraged to increase exercise by 1-2 hrs/day + Decrease sedentary behaviour to a total of 2 hrs/day or less + Nutrition recommendations + 6 telephone calls from/visits to the physician.                                                                                                                                                                                                      | fat mass, WC & WC-SDS                                              |
| 26. | Tan-Ting 2011 <sup>27</sup><br>Philippines              | Cohort:<br>Total = 44                                                                | BMI ≥ 95 <sup>th</sup> %ile (CDC)                               | D+E:<br>Clinic (Hospital)                      | Multidisciplinary, individualised, behavioural modification and exercise programme (St Luke's Medical Center Obesity & Weight Management Program)<br>Dietary session (6 sessions over 3 mths) + Restricted diet (1200-1500 Kcal/day) + Physical activity (24 x 1hr sessions over 3 mths + encouraged to do ≥ 30 min of individual exercise) + Behavioural management (4 x sessions over 3 mths). | body mass, fat mass, WC & WC-SDS                                   |
| 27. | Valle Jimenez 2013 <sup>28</sup><br>Spain               | Cohort<br>Total = 50 (plus n=50 non-obese control)                                   | BMI >95 <sup>th</sup> percentile growth curves for Spanish pop. | D+E:<br>Academic Institution/Clinic (Hospital) | Behavioural components, physical exercise and nutritional education. Energy distribution of diet: 25% between breakfast & lunch; 30-35% at lunch; 15% afternoon snack; remainder dinner. Moderate-to-intense PA for 30 mins at least 3 days per wk. Aim that 1 month after the start of tx subjects should be engaging in 60 mins/day moderate-to-intense physical exercise.                     | Body mass only                                                     |
| 28. | Vanhelst 2013 <sup>29</sup><br>France                   | Cohort<br>Total=37                                                                   | ND                                                              | D+E:<br>Community                              | 2hr/wk exercise sessions + 2hr/3 months health education session.                                                                                                                                                                                                                                                                                                                                | Fat mass, fat free mass                                            |
| 29. | Vasquez 2013 <sup>30</sup><br>Chile                     | Cohort<br>X-over trial<br>(Group 1 only)<br>Total = 60                               | BMI ≥ 95 <sup>th</sup> %ile CDC                                 | D+E:<br>Academic Institution                   | Group nutrition education sessions x 6 (5 for children; 1 for parents)<br>Psychologist support sessions x 6 (5 for children; 1 for parents)<br>PE 45 mins x3/wk (30 sessions in total)                                                                                                                                                                                                           | Body mass, WC                                                      |
| 30. | Verduci 2015 <sup>31</sup><br>Italy                     | Cohort:<br>Total = 85                                                                | BMI Cole's curve cut-off 30 kg/m <sup>2</sup> at 18 yrs         | D+E:<br>Clinic (Hospital)                      | Normocaloric balanced diet + 60 min/day moderate/vigorous exercise + 1 hr educational session with dietician at recruitment.                                                                                                                                                                                                                                                                     | WC only                                                            |
| 31. | Vos, 2011 <sup>32</sup><br>Netherlands                  | RCT<br>Total = 81 (BL: 79 An. 69)<br>I = 41 (BL 40: An. 36)<br>OC=40 (BL 39: An. 33) | Cole <i>et al</i> criteria                                      | D+E:<br>Clinic (Hospital)                      | 12 mths: During first 3 mths (7 x 2.5 hr/2 wks children group meetings + 5 x 2.5 hr/2 wks parent meetings + 1 x 2.5 hr/2 wks child/parent meeting + 2-3 refresher follow-up sessions for total of 2 yrs).<br>Also included exercise however not described except in flow diagram                                                                                                                 | WC-SDS only                                                        |
| 32. | Weiss 2009 <sup>33</sup><br>USA<br>Yale<br><b>TEAMS</b> | Cohort:<br>Total = 186                                                               | BMI > 95 <sup>th</sup> %ile (CDC)                               | D+E:<br>Clinic (Hospital)                      | Subjects followed biannually as outpatients + Received nutritional/PA guidance. Levels of adherence to these recommendations was not evaluated or documented                                                                                                                                                                                                                                     | Body mass only                                                     |

|     |                                      |                                          |                                                                                                                |                   |                                                                                   |                |
|-----|--------------------------------------|------------------------------------------|----------------------------------------------------------------------------------------------------------------|-------------------|-----------------------------------------------------------------------------------|----------------|
| 33. | Weigel 2008 <sup>34</sup><br>Germany | RCT:<br>Total = 73<br>IG = 37<br>OC = 36 | OW BMI > 90 <sup>th</sup> %ile<br>OB BMI > 97 <sup>th</sup> %ile<br>Extremely OB BMI > 99.5 <sup>th</sup> %ile | D+E:<br>Community | Twice wkly 45-60 min sessions on exercise/dietary education/coping strategies.    | Fat mass only  |
| 34. | Wong 2009 <sup>35</sup><br>USA       | Cohort:<br>Total = 21                    | BMI ≥ 95 <sup>th</sup> %ile                                                                                    | D+E:<br>Community | 6 x 1hr behavioural lessons + 4 x 1hr PA/ nutrition lessons + 1800 kcal/day diet. | body mass only |

**KEY:** %ile = percentile; AmO = Outpatient Ambulatory; An. = analysed; apt. = appointment; BB =Bright Bodies; BFC = Better food choices; BL = baseline; BM = behaviour modification; BMI= body mass index; C = control; CG: control group; CBT = cognitive behavioural therapy; CDC = Centre for Disease Control; CG = control group; CHO = carbohydrate; D = diet; E = exercise; FBBT = family-based behavioural treatment; F = female; FU = follow up; GI = glycaemic index; GT = group therapy; HGI = high glycaemic index; hr = hour; HZ = heterozygous; HO = homozygous; ht = height; I = intervention; IG= intervention group; IOTF = International Obesity Task Force; Inpt. = inpatient; LGI = low glycaemic index; LMS= least-mean-squares; LS = long stay; min= minute; mth = month; MO = morbidly obese; norm. normal; n = number; NAFLD = Non-alcoholic fatty liver disease; ND = not described; NR = not reported; OB = obese; OC = obese control; OW = overweight; paed. = paediatric; PA = physical activity; PE = physical activity; PROT= protein; ppts= participants; RCT = randomised controlled trial; SD = standard deviation; SDS = standard deviation score; SE: standard error; SMP= Structured meal plan; SS= short stay; SMC= structured modified carbohydrate diet; trad. = traditional; Trad. act = traditional activity; tx = treatment; TEAMS = Tracking Endpoints in Adolescent MS; wk = week; WList OC– wait list obese control; WL = weight loss; wt = weight; X-over = crossover; yr = year

1. Carraway ME, Lutes LD, Crawford Y, et al. Camp-based immersion treatment for obese, low socioeconomic status, multi-ethnic adolescents. *Childhood obesity* (Print). 2014;10(2): 122-131
2. Croker H, Viner RM, Nicholls D. Family-based behavioural treatment of childhood obesity in a UK National Health Service setting: randomized controlled trial. *International Journal of Obesity*. 2012; 36(1):16-26
3. Doughty KN, Njike VY, Katz DL. Effects of a Cognitive-Behavioral Therapy-Based Immersion Obesity Treatment Program for Adolescents on Weight, Fitness, and Cardiovascular Risk Factors: A Pilot Study. *Childhood Obesity*. 2015;11(2):215-218
4. Elloumi M, Ben Ounis O, Makni E, Van Praagh E, Tabka Z, Lac G. Effect of individualized weight-loss programmes on adiponectin, leptin and resistin levels in obese adolescent boys. *Acta Paediatr*. 2009; 98(9):1487-93
5. Grulich-Henn J, Lichtenstein S, Hörster F, Hoffmann GF, Nawroth PP, Hamann A. Moderate weight reduction in an outpatient obesity intervention program significantly reduces insulin resistance and risk factors for cardiovascular disease in severely obese adolescents. *Int J Endocrinol*. 2011:541021
6. Gunnarsdottir T, Einarsson SM, Njardvik U, et al. Family-based behavioral treatment for obese children - results and two year follow up. *Laknabladid*. 2014;100(3):139-45
7. Holm JC, Buckert M, Hans-Christoph Friederich H-C, et al. Time course and determinants of leptin decline during weight loss in obese boys and girls. *International Journal of Pediatric Obesity*. 2007; 2(1): 2-10
8. Kalavainen M, Utriainen P, Vanninen E, Korppi M, Nuutinen O. Impact of childhood obesity treatment on body composition and metabolic profile. *World Journal of Pediatrics*. 2012; 8(1):31-7
9. Kolsgaard ML, Joner G, Brunborg C, et al. Reduction in BMI z-score and improvement in cardiometabolic risk factors in obese children and adolescents. The Oslo Adiposity Intervention Study - a hospital/public health nurse combined treatment.[Erratum appears in BMC Pediatr. 2012;12:77; PMID: 22709339]. *BMC Pediatrics*. 2011; 11: 47
10. Kolotourou M, Radley D, Gammon C, Smith L, Chadwick P, Sacher PM. Long-Term Outcomes following the MEND 7-13 Child Weight Management Program. *Childhood Obesity*. 2015;11(3): 325-330

11. Marcano, H, Fernández M, Paoli M, et al. Limited Weight Loss or Simply No Weight Gain following Lifestyle-Only Intervention Tends to Redistribute Body Fat, to Decrease Lipid Concentrations, and to Improve Parameters of Insulin Sensitivity in Obese Children. *International Journal of Pediatric Endocrinology*. 2011(1): 241703
12. Mager DR, Iñiguez IR, Gilmour S, Yap J. The effect of a low fructose and low glycemic index/load (FRAGILE) dietary intervention on indices of liver function, cardiometabolic risk factors, and body composition in children and adolescents with non-alcoholic fatty liver disease (NAFLD). *J Parenter Enteral Nutr*. 2015;39(1):73-84
13. Makkes S, Renders CM, Bosmans JE, van der Baan-Slootweg OH, Hoekstra T, Seidell JC. One-year effects of two intensive inpatient treatments for severely obese children and adolescents. *BMC Pediatrics*. 2016; 16:120 doi: 10.1186/s12887-016-0659-x
14. Martos R, Valle M, Morales RM, Cañete R, Gascón F, Urbano MM. Changes in body mass index are associated with changes in inflammatory and endothelial dysfunction biomarkers in obese prepubertal children after 9 months of body mass index SD score loss. *Metabolism-Clinical and Experimental*. 2009; 58(8):1153-1160
15. Obert P, Gueugnon C, Nottin S, et al. Impact of diet and exercise training-induced weight loss on myocardial mechanics in severely obese adolescents. *Obesity*, 2013; 21(10): 2091-8
16. Panagiotopoulos C, Ronsley R, Al-Dubayee M, et al. The Centre for Healthy Weights-Shapedown BC: A Family-Centered, Multidisciplinary Program that Reduces Weight Gain in Obese Children over the Short-Term. *International Journal of Environmental Research and Public Health*. 2011; 8(12):4662-4678
17. Pozzato C, Verduci E, Scaglioni S, Liver Fat Change in Obese Children After a 1-year Nutrition-behavior Intervention. *Journal of Pediatric Gastroenterology and Nutrition*. 2010;51(3), 331–335
18. Verduci E, Radaelli G, Salvioni M, Riva E, Giovannini M. Plasma long-chain fatty acids profile and metabolic outcomes in normolipidaemic obese children after one-year nutritional intervention. *Acta paediatrica*. 2011;100(4): 585-9
19. Reinehr T. and Andler W. Changes in the atherogenic risk factor profile according to degree of weight loss. *Archives of Disease in Childhood*. 2004;89(5):419-422
20. Reinehr T, C Schmidt C, Toschke AM, Andler W. Lifestyle intervention in obese children with non-alcoholic fatty liver disease: 2-year follow-up study. *Archives of Disease in Childhood*. 2009; 94(6):437-442

21. Rijks JM, Plat J, Mensink RP, Dorenbos E, Buurman WA, Vreugdenhil AC. Children with morbid obesity benefit equally as children with overweight and obesity from an ongoing care program. *Journal of Endocrinol Metab.* 2015; 100(9): 3572-3580
22. Rovira AF, París Miró N, Zaragoza-Jordana M, et al. Clinical and metabolic effectiveness of a new motivational therapy for the treatment of obesity in adolescents (OBEMAT). *Anales De Pediatría.* 2013; 78(3): 157-166
23. Santomauro M, Paoli-Valeri M, Fernández M, et al. Non-alcoholic fatty liver disease and its association with clinical and biochemical variables in obese children and adolescents: Effect of a one-year intervention on lifestyle. *Endocrinología y Nutrición (English Edition)*, 2012;59(6): p. 346-353
24. Schum J, Blumenstock G, Weber K, et al. Variants of the FTO Gene in Obese Children and their Impact on Boy Composition and Metabolism before and after Lifestyle Intervention. *Experimental and Clinical Endocrinology & Diabetes.* 2012;120(3):128-131
25. Shalitin S, Ashkenazi-Hoffnung L, Yackobovitch-Gavan M, et al. Effects of a Twelve-week randomized intervention of exercise and/or diet on weight loss and weight maintenance, and other metabolic parameters in obese preadolescent children. *Hormone Research.* 2009;72(5):287-301
26. Springer F, Ballweg V, Schweizer R, et al. Changes in whole-body fat distribution, intrahepatic lipids, and insulin resistance of obese adolescents during a low-level lifestyle intervention. *European Journal of Pediatrics,* 2015;174(12):1603-12
27. Tan-Ting AM, Llido L. Outcome of a hospital based multidisciplinary weight loss program in obese Filipino children. *Nutrition.* 2011; 27:50-54
28. Valle Jimenez M, Martos R, Morales RM, et al. Relationship between changes in plasma leptin concentrations and plasminogen activator inhibitor-1 in obese prepubertal children after nine months of treatment. *Annals of nutrition & metabolism.* 2013; 63(3): 216-22
29. Vanhelst J, Fardy PS, Béghin L, Bui-Xuan G, Mikulovic J. Strategies in intervention programmes for obese youth: implication of the age and the type of physical activities. *Clinical Physiology and Functional Imaging.* 2015; 35(1): 17-20
30. Vasquez F, Diaz E, Lera L, Vasquez L, Anziani A, Burrows R. Impact of a strength training exercise program on body composition and cardiovascular risk factors in a group of obese schoolchildren by pubertal stage. *American Journal of Sports Science and Medicine.* 2014; 2(1): 40-47
31. Verduci E, Lassandro C, Giacchero R, Miniello VL, Banderali G, Radaelli G. Change in metabolic profile after 1-year nutritional-behavioral intervention in obese children. *Nutrients.* 2015; 7(12): 10089-10099
32. Vos RC, Wit JM, Pijl H, Houdijk EC. Long-term effect of lifestyle intervention on adiposity, metabolic parameters, inflammation and physical fitness in obese children: a randomized controlled trial. *Nutrition & Diabetes.* 2011; 1:e9. doi: 10.1038/nutd.2011.5

33. Weiss R, Shaw M, Savoye M, Caprio S. Obesity dynamics and cardiovascular risk factor stability in obese adolescents. *Pediatric Diabetes*. 2009; 10(6): 360-7
34. Wiegand C, Kokocinski K, Lederer P, Dötsch J, Rascher W, Knerr I. Childhood obesity: Concept, feasibility, and interim results of a local group-based, long-term treatment program. *J Nutr Educ Behav*. 2008; 40:369-373
35. Wong WW, Abrams SH, Mikhail C, et al. An innovative summer camp program improves weight and self-esteem in obese children. *Journal of Pediatric Gastroenterology and Nutrition*. 2009; 49(4):493-497
